# Supplementary material for: Molecular response to aromatase inhibitor treatment in primary breast cancer
Source: Breast Cancer Res. 2007 Jun 7;9(3):R37. doi: 10.1186/bcr1732 (PMC1929101; doi:10.1186/bcr1732)
Supplement: Additional file 1 — Primer sequences used in RT-PCR [file bcr1732-S1.xls]

## Sheet: Sheet1
Gene	Forward	Reverse
CCND1	TGTCCTACTACCGCCTCACA	CCAGGTCCACCTCCTCCT
PDZK1	GTGAAAACACGGGTGGACTT	GCCAGAACTCCAGCTCTCAT
FAS	TTTTGCCTTGGTGCTCATCTT	TGGTGGACTATTAAGTATTTTTTGGTGAT
TFF1	GAGGTAATGGCCACCATGGA	CGAGGGCCAGCATGGA
MAN1A1	GGACTTTGACCATGTCAATTTTCA	AATTTCATATGTTTCAGCCTAATCCA
TBP	GGGGAGCTGTGATGTGAAGT	CCAGGAAATAACTCTGGCTCA
KIAA0674	GGGCAACTCTGAAAGCTCTG	CTTCATCCCAGCCAGTCAAT
