# Supplementary material for: Molecular response to aromatase inhibitor treatment in primary breast cancer
Source: Breast Cancer Res. 2007 Jun 7;9(3):R37. doi: 10.1186/bcr1732 (PMC1929101; doi:10.1186/bcr1732)
Supplement: Additional file 2 — A summary of relevant patient information [file bcr1732-S2.xls]

## Sheet: Sheet1
Patient	Age	Drug	ER-Pre P	ER-Pre I	ER-Post P	ER Post I	PgR-Pre P	PgR Pre I	PgR-Post P	PgR Post I	Ki67 pre			Pre KI67%	Ki67 post			Post Ki67%	erbB2	erbB2	? HRT	size	nodal inv	no of nodes	npi	grade
12	57	A	5	3	5	3	4	2	3	1	169	2030	2199	7.68531	26	1960	1986	1.30916	0	0	never	25	yes	1;17	4.5	2
17	69	A	5	3	5	3	1	1	0	0	346	3630	3976	8.70221	38	1610	1648	2.30583	0	0	previous	32	yes	2;22		1
21	57	F	5	3	5	3	3	2	2	1	216	1440	1656	13.0435	13	1400	1413	0.920028	0	0	never	17	no		3.34	2
25	77	A	5	3	5	3	0	0	0	0	330	2630	2960	11.1486	21	1710	1731	1.21317	0	0	never	22	yes	2;18	4.44	2
30	84	A	5	3	5	3	1	2	0	0	347	2100	2447	14.1806	96	2170	2266	4.23654	0	0	never	36	yes	2;11	4.72	2
35	53	F	5	3	5	3	0	0	0	0	41	2010	2051	1.99902	26	1910	1936	1.34298	0	0	previous	13	no		3.26	2
39	73	A	2	1	1	1	0	0	2	1	240	2160	2400	10	156	1640	1796	8.68597	0	0	never	17	no		4.34	3
42	65	F	2	1	2	2	0	0	0	0	509	4970	5479	9.29002	779	3110	3889	20.0309	3	1	never	26	yes	3;21	5.52	3
43	49	F	4	2	4	2	3	2	3	1	26	5060	5086	0.511207	130	2700	2830	4.59364	0	0	previous	55	yes	1;14	5.1	2
61	68	A	5	3	5	3	5	2	1	1	319	1640	1959	16.2838	64	1980	2044	3.13112	0	0	never	20	no		3.4	2
64	76	F	1	1	2	1	0	0	0	0	438	1470	1908	22.956	2	2210	2212	0.0904159	3	1	never	20	no		4.4	3
67	81	A	5	3	5	3	5	3	0	0	81	2160	2241	3.61446	0	1000	1000	0	0	0	never	23	no		3.46	2
70	56	A	5	3	5	3	3	2	3	2	91	1160	1251	7.27418	5	1650	1655	0.302115	0	0	never	32	no		3.64	2
71	72	F	5	3	5	3	5	3	0	0	42	1030	1072	3.91791	23	2120	2143	1.07326	0	0	never	23	yes	1;18	3.46	1
90	62	A	5	3	5	3	2	1	0	0	89	1490	1579	5.63648	13	1520	1533	0.84801		0	current	17	yes	1;16	4.42	2
107	81	A	5	3	5	2	0	0	0	0	112	1150	1262	8.8748	4	1000	1004	0.398406	0	0	never	14	no		3.28	2
117	81	F	5	3	5	3	5	3	0	0	312	2410	2722	11.4622	0	1000	1000	0	0	0	never	19	yes	1;12	4.38	2
123	71	F	5	3	5	3	5	3	4	2	45	2010	2055	2.18978	8	1400	1408	0.568182	0	0	never	15	yes	1;19	3.3	1
125	60	F	5	3	5	2	4	1	0	0	225	1680	1905	11.811	5	1210	1215	0.411523	0	0	current	30	yes	13;25	5.6	2
138	85	F	1	1	0	0	0	0	0	0	135	1270	1405	9.60854	23	1500	1523	1.51018	0	0	never	15	no		4.3	3
141	82	F	5	3	5	2	0	0	0	0	221	2220	2441	9.05367	19	2150	2169	0.87598	0	0	never	20	yes	1;4	4.39	2
145	76	A	5	3	5	3	0	0	0	0	138	1280	1418	9.73202	1	1330	1331	0.0751315	0	0	never	12	no		3.24	2
146	81	F	5	3	5	2	5	3	4	2	282	2400	2682	10.5145	10	1830	1840	0.543478	2	1	never	11	no		3.22	2
148	73	A	5	3	5	3	0	0	0	0	93	1900	1993	4.66633	2	1970	1972	0.10142	0	0	never	18	no		3.36	2
149	53	F	5	2	5	2	0	0	0	0	154	1090	1244	12.3794	6	1000	1006	0.596421	0	0	current	8	no		3.16	2
151	63	A	5	3	5	2	2	1	0	0	65	970	1035	6.28019	14	1780	1794	0.780379	0	0	never	14	yes	1;4	3.28	1
152	61	F	4	2	5	2	0	0	0	0	307	1560	1867	16.4435	40	110	150	26.6667	0	0	never	60	no		4.2	2
155	80	A	5	3	5	2	5	3	5	1	51	1180	1231	4.14297	20	940	960	2.08333	0	0	never	60	yes	2;22	5.2	2
162	52	A	3	2	3	1	0	0	0	0	241	1780	2021	11.9248	136	2200	2336	5.82192	0	0	never	23	yes	7;26	6.46	3
164	57	F	5	2	5	2	0	0	0	0	218	1570	1788	12.1924	38	1970	2008	1.89243	0	0	current	17	yes	4;28		3
175	68	A	5	2	5	2	0	0	0	0	178	1600	1778	10.0112	0	1000	1000	0	0	0	previous	23	yes	1;12	4.46	2
201F	74	A	5	2	5	1	5	2	5	1	296	1630	1926	15.3686	12	1210	1222	0.981997	0	0	never	20	no		4.2	3
202F	55	A	5	2	5	1	2	2	0	0	303	2110	2413	12.557	71	1230	1301	5.45734	1	0	never	19	yes	3;21	4.38	2
203F	80	F	5	2	5	1	2	1	0	0	311	1740	2051	15.1633	103	1700	1803	5.7127	3	1	never	22	no		3.44	2
204F	65	F	5	2	4	1	5	2	0	0	275	1310	1585	17.3502	9	1540	1549	0.58102	0	0	current	45	yes	14;14	3.9	2
205F	76	F	5	2	5	2	4	2	3	1	60	1020	1080	5.55556	13	1240	1253	1.03751	0	0	never	25	yes	1;20	5.5	3
207F	60	F	5	1	5	1	5	3	4	1	118	1710	1828	6.45514	3	1510	1513	0.198282	0	0	current	30	yes	1;9	4.6	2
209F	63	A	5	3	5	2	5	3	4	2	18	850	868	2.07373	2	1330	1332	0.15015	1	0	never	35	no		3.7	2
212F	86	F	5	2	5	1	5	2	0	0	162	1440	1602	10.1124	5	1680	1685	0.296736	0	0	never	30	no		3.6	2
213F	72	F	5	2	5	2	3	1	0	0	439	1760	2199	19.9636	223	2630	2853	7.81633	0	0	never	28	no		4.56	3
214F	63	A	5	3	5	2	4	3	2	2	33	840	873	3.78007	22	1310	1332	1.65165	0	0	never	20	yes	4;15	4.4	1
216F	53	F	5	3	5	2	3	2	0	0	57	1420	1477	3.85917	24	1270	1294	1.85471	3	1	never	15	no		4.3	3
217F	60	A	5	3	5	3	5	3	4	1	53	1390	1443	3.6729	4	1740	1744	0.229358	0	0	never	19	yes	10;21	5.38	2
218F	71	F	5	2	5	2	5	2	2	1	177	1710	1887	9.37997	7	1690	1697	0.412493	0	0	current	24	yes	15;15	3.5	2
223F	75	A	5	3	5	2	5	3	4	1	291	1000	1291	22.5407	41	1120	1161	3.53144	0	0	never	18	no		3.36	2
227F	49	F	5	3	5	2	5	3	0	0	310	1770	2080	14.9038	34	1500	1534	2.21643	0	0	current	14	no		3.28	2
228F	47	F	5	2	5	2	0	0	0	0	237	1250	1487	15.9381	163	2780	2943	5.53857	3	1	never	35	yes	8;32	6.7	2
229F	57	F	5	3	5	2	5	3	4	1	443	2240	2683	16.5114	25	1670	1695	1.47493	2	1	never	70	yes	3;42	5.4	2
230F	61	F	5	3	5	2	3	2	0	0	351	1070	1421	24.7009	78	1560	1638	4.7619	2	1	never	70	yes	6;19	7.4	3
231F	73	A	5	2	5	2	5	2	5	2	264	1390	1654	15.9613	0	1140	1140	0	0	0	never	25	yes	2;4	4.5	2
261	68	A	5	2	5	2	3	1	0	0	136	1380	1516	8.97098	14	1640	1654	0.846433	0	0	never	21	no		2.42	1
262	60	A	5	3	5	3	5	3	0	0	43	1000	1043	4.12272	1	1060	1061	0.0942507	0	0	never	29	yes	7;18	5.58	2
263	78	F	5	3	5	2	5	2	5	1	25	1090	1115	2.24215	0	1560	1560	0	0	0	never	25	yes	6;18	5.5	2
P3	59	?	5	2	5	1	NA	NA	NA	NA	222	1240	1462	15.8	38	1447	1485	2.56	1	0	never	28	yes	2;18		2
