# Supplementary material for: Molecular response to aromatase inhibitor treatment in primary breast cancer
Source: Breast Cancer Res. 2007 Jun 7;9(3):R37. doi: 10.1186/bcr1732 (PMC1929101; doi:10.1186/bcr1732)
Supplement: Additional file 6 — Annotation of the Breakthrough 17K microarray [file bcr1732-S6.xls]

## Sheet: Breakthrough human cDNA 17K 2.1
ID	SYMBOL	DESCRIPTION	UNIGENE (189)	IMAGE ID	GENBANK
HSI001A01	HIST1H1C	Histone 1, H1c	Hs.7644	66317	BX092939
HSI001A02	TAF11	TAF11 RNA polymerase II, TATA box binding protein (TBP)-associated factor, 28kDa	Hs.112444	66321	BX093017
HSI001A03	NDUFC1	NADH dehydrogenase (ubiquinone) 1, subcomplex unknown, 1, 6kDa	Hs.84549	66353	BX101794
HSI001A04	SMCHD1	Structural maintenance of chromosomes flexible hinge domain containing 1	Hs.8118	66330	BX094022
HSI001A05	CR1L	Complement component (3b/4b) receptor 1-like	Hs.149414	66327	BX094042
HSI001A06	RGS2	Regulator of G-protein signalling 2, 24kDa	Hs.78944	21531	BX114059
HSI001A07	MARF1	Membrane-associated ring finger (C3HC4) 1	Hs.136900	22187	BX089111
HSI001A08	RIF1	RAP1 interacting factor homolog (yeast)	Hs.536537	23760	BX098724
HSI001A09	PRKAR1A	Protein kinase, cAMP-dependent, regulatory, type I, alpha (tissue specific extinguisher 1)	Hs.280342	22599	BX102666
HSI001A10	RNF11	Ring finger protein 11	Hs.309641	22054	BX110632
HSI001A11	TNRC15	Trinucleotide repeat containing 15	Hs.435841	21739	BX102651
HSI001A12	RP11-301I17.1	Proliferation-inducing protein 38	Hs.128258	22378	BX103982
HSI001B01	HDHD1A	Haloacid dehalogenase-like hydrolase domain containing 1A	Hs.185910	22170	BX112318
HSI001B02	CD59	CD59 antigen, complement regulatory protein	Hs.278573	22379	BX116252
HSI001B03	KCNJ10	Potassium inwardly-rectifying channel, subfamily J, member 10	Hs.408960	1703854	BX095323
HSI001B04	PIAS4	Protein inhibitor of activated STAT, 4	Hs.105779	23661	BX093933
HSI001B05	OLFM1	Olfactomedin 1	Hs.522484	22172	BX097950
HSI001B06	CACNA1I	Calcium channel, voltage-dependent, alpha 1I subunit	Hs.125116	21741	BX101763
HSI001B07	GGA2	Golgi associated, gamma adaptin ear containing, ARF binding protein 2	Hs.460336	21744	CR736332
HSI001B08	SLITRK1	SLIT and NTRK-like family, member 1	Hs.415478	22385	T82468
HSI001B09	R3HDM1	R3H domain containing 1	Hs.412462	21627	BX114773
HSI001B10	CLSPN	Claspin homolog (Xenopus laevis)	Hs.175613	53147	R15753
HSI001B11	CALM3	Calmodulin 3 (phosphorylase kinase, delta)	Hs.515487	53107	CR736564
HSI001B12	TRRAP	Transformation/transcription domain-associated protein	Hs.203952	21537	BX094631
HSI001C01	INSL4	Insulin-like 4 (placenta)	Hs.418506	66428	BX102762
HSI001C02	SFRS3	Splicing factor, arginine/serine-rich 3	Hs.405144	53225	R15850
HSI001C03	BAT2	HLA-B associated transcript 2	Hs.436093	22479	T73997
HSI001C04	TRAF3IP2	TRAF3 interacting protein 2	Hs.486228	22279	BX107338
HSI001C05	LAPTM5	Lysosomal associated multispanning membrane protein 5	Hs.371021	22589	BX111038
HSI001C06	KIAA0146	KIAA0146 protein	Hs.381058	21752	CR748029
HSI001C07	BLMH	Bleomycin hydrolase	Hs.371914	22483	BX096617
HSI001C08	FLJ21963	FLJ21963 protein	Hs.259559	22389	BX100648
HSI001C09	RUVBL2	RuvB-like 2 (E. coli)	Hs.515846	22267	BX112647
HSI001C10	FOXK2	Forkhead box K2	Hs.132161	21980	BX098497
HSI001C11	SATB2	SATB family member 2	Hs.516617	21969	BX118639
HSI001C12	LBP	Lipopolysaccharide binding protein	Hs.154078	66437	BX108847
HSI001D01	ABCA2	ATP-binding cassette, sub-family A (ABC1), member 2	Hs.421202	21642	T65432
HSI001D02	WDR5B	WD repeat domain 5B	Hs.567513	53017	BX110645
HSI001D03	C3orf1	Chromosome 3 open reading frame 1	Hs.477287	21445	BX097522
HSI001D04	CENTB2	Centaurin, beta 2	Hs.478746	53247	BX104347
HSI001D05	MCL1	Myeloid cell leukemia sequence 1 (BCL2-related)	Hs.532826	21555	BX103451
HSI001D06	SCAP	SREBP cleavage-activating protein	Hs.531789	22109	BX089335
HSI001D07	C3orf39	Chromosome 3 open reading frame 39	Hs.12313	22739	BX114453
HSI001D08	LIPT1	Lipoyltransferase 1	Hs.516235	22085	BX100979
HSI001D09	SMARCD1	SWI/SNF related, matrix associated, actin dependent regulator of chromatin, subfamily d, member 1	Hs.79335	22082	BX105023
HSI001D10	PSMC6	Proteasome (prosome, macropain) 26S subunit, ATPase, 6	Hs.156171	22594	BX102767
HSI001D11	FNBP1L	Formin binding protein 1-like	Hs.134060	22086	BX107196
HSI001D12	B4GALT4	UDP-Gal:betaGlcNAc beta 1,4- galactosyltransferase, polypeptide 4	Hs.13225	22396	BX114555
HSI001E01	PPP3CC	Protein phosphatase 3 (formerly 2B), catalytic subunit, gamma isoform (calcineurin A gamma)	Hs.149413	22954	BX096936
HSI001E02	DENR	Density-regulated protein	Hs.22393	21770	BX100819
HSI001E03	OBSL1	Obscurin-like 1	Hs.526594	23584	BX104887
HSI001E04	SYNJ1	Synaptojanin 1	Hs.473632	21984	BX108757
HSI001E05	ROCK2	Rho-associated, coiled-coil containing protein kinase 2	Hs.58617	21560	BX091170
HSI001E06	NT5E	5'-nucleotidase, ecto (CD73)	Hs.153952	21655	BX117470
HSI001E07	CDC27	Cell division cycle 27	Hs.463295	66465	BX116848
HSI001E08	PSMD12	Proteasome (prosome, macropain) 26S subunit, non-ATPase, 12	Hs.4295	53016	BX092034
HSI001E09	ANXA5	Annexin A5	Hs.480653	66470	BX117629
HSI001E10	LAP3	Leucine aminopeptidase 3	Hs.479264	66476	BX095649
HSI001E11	FLJ45537	FLJ45537 protein	Hs.99436	1695440	BX097894
HSI001E12	EST	Transcribed locus	Hs.585664	21908	CR739716
HSI001F01	CDC42SE2	CDC42 small effector 2	Hs.508829	22209	BX107990
HSI001F02	EST	Transcribed locus		22099
HSI001F03	ASCC1	Activating signal cointegrator 1 complex subunit 1	Hs.500007	23061	BX109348
HSI001F04	IARS	Isoleucine-tRNA synthetase	Hs.445403	21892	BX117258
HSI001F05	KIAA1155	KIAA1155 protein	Hs.416735	53148	BX106965
HSI001F06	EIF1B	Eukaryotic translation initiation factor 1B	Hs.315230	53029	BX103996
HSI001F07	HNRPA0	Heterogeneous nuclear ribonucleoprotein A0	Hs.96996	53153	BX105700
HSI001F08	NOPE	Likely ortholog of mouse neighbor of Punc E11	Hs.458607	53370	BX113444
HSI001F09	PGAM1	Phosphoglycerate mutase 1 (brain)	Hs.447492	53046	BX116273
HSI001F10	PIGO	Phosphatidylinositol glycan, class O	Hs.522099	21678	BX099375
HSI001F11	KIAA0280	KIAA0280	Hs.475334	22107	BX113950
HSI001F12	WAC	WW domain containing adaptor with coiled-coil	Hs.435610	21790	CR741243
HSI001G01	BTBD15	BTB (POZ) domain containing 15	Hs.178499	22252	BX089702
HSI001G02	TREX2	Three prime repair exonuclease 2	Hs.170835	22025	BX090145
HSI001G03	CHST1	Carbohydrate (keratan sulfate Gal-6) sulfotransferase 1	Hs.104576	53039	R15740
HSI001G04	EMR1	Egf-like module containing, mucin-like, hormone receptor-like 1	Hs.2375	66507	BX102513
HSI001G05	ACOT12	Acyl-CoA thioesterase 12	Hs.439127	66467	BX102586
HSI001G06	CBFA2T3	Core-binding factor, runt domain, alpha subunit 2; translocated to, 3	Hs.513811	21684	BX099084
HSI001G07	STXBP1	Syntaxin binding protein 1	Hs.288229	53262	BX104369
HSI001G08	P2RY13	Purinergic receptor P2Y, G-protein coupled, 13	Hs.546396	66596	BX111421
HSI001G09	SLC22A15	Solute carrier family 22 (organic cation transporter), member 15	Hs.125482	53061	BX091921
HSI001G10	EST	Transcribed locus		1705117
HSI001G11	GRIA4	Glutamate receptor, ionotrophic, AMPA 4	Hs.503743	53049	BX115272
HSI001G12	ANAPC5	Anaphase promoting complex subunit 5	Hs.7101	21906	BX107140
HSI001H01	PDZD2	PDZ domain containing 2	Hs.481819	22121	T65304
HSI001H02	NDST2	N-deacetylase/N-sulfotransferase (heparan glucosaminyl) 2	Hs.225129	21468	BX096078
HSI001H03	PPP1R14C	Protein phosphatase 1, regulatory (inhibitor) subunit 14C	Hs.486798	22259	BX112442
HSI001H04	GBP4	Guanylate binding protein 4	Hs.409925	22443	T74222
HSI001H05	NTRK2	Neurotrophic tyrosine kinase, receptor, type 2	Hs.584783	22032	CR748576
HSI001H06	NARG1L	NMDA receptor regulated 1-like	Hs.512914	22328	BX101847
HSI001H07	EST	Transcribed locus	Hs.404306	22559	BX113654
HSI001H08	KTI12	KTI12 homolog, chromatin associated (S. cerevisiae)	Hs.147779	23408	R39294
HSI001H09	EGFL6	EGF-like-domain, multiple 6	Hs.12844	21599	BX116443
HSI001H10	TCF12	Transcription factor 12 (HTF4, helix-loop-helix transcription factors 4)	Hs.511504	53051	BX093940
HSI001H11	ASNS	Asparagine synthetase	Hs.489207	53243	BX104871
HSI001H12	PDIA5	Protein disulfide isomerase family A, member 5	Hs.477352	66655	BX110549
HSI002A01	NETO2	Neuropilin (NRP) and tolloid (TLL)-like 2	Hs.444046	53175	BX090832
HSI002A02	SLCO2B1	Solute carrier organic anion transporter family, member 2B1	Hs.7884	53187	BX112510
HSI002A03	AGTRAP	Angiotensin II receptor-associated protein	Hs.464438	21816	BX098744
HSI002A04	CLPB	ClpB caseinolytic peptidase B homolog (E. coli)	Hs.523877	53289	BX114454
HSI002A05	TCERG1	Transcription elongation regulator 1	Hs.443465	66619	BX111611
HSI002A06	C8orf77	Chromosome 8 open reading frame 77	Hs.359978	1692762	BX104600
HSI002A07	INSM1	Insulinoma-associated 1	Hs.89584	22895	BX115059
HSI002A08	KCNK1	Potassium channel, subfamily K, member 1	Hs.208544	22468	BX100776
HSI002A09	SUPT6H	Suppressor of Ty 6 homolog (S. cerevisiae)	Hs.250429	22991	BX094633
HSI002A10	SLC4A4	Solute carrier family 4, sodium bicarbonate cotransporter, member 4	Hs.5462	22045	BX102681
HSI002A11	ENTPD6	Ectonucleoside triphosphate diphosphohydrolase 6 (putative function)	Hs.500375	22795	BX095972
HSI002A12	KIAA1530	KIAA1530 protein	Hs.380475	1690843	BX109670
HSI002B01	PPP3CB	Protein phosphatase 3 (formerly 2B), catalytic subunit, beta isoform (calcineurin A beta)	Hs.500067	53079	BX102911
HSI002B02	SPOCK1	Sparc/osteonectin, cwcv and kazal-like domains proteoglycan (testican) 1	Hs.567340	21615	BX089983
HSI002B03	PNMA6A	Paraneoplastic antigen like 6A	Hs.533301	66684	BX118395
HSI002B04	ADD3	Adducin 3 (gamma)	Hs.501012	21619	CR744872
HSI002B05	SLC4A3	Solute carrier family 4, anion exchanger, member 3	Hs.1176	21515	BX100477
HSI002B06	EST	Transcribed locus		21717
HSI002B07	HEAB	ATP/GTP-binding protein	Hs.523687	53195	BX116274
HSI002B08	KPNA2	Karyopherin alpha 2 (RAG cohort 1, importin alpha 1)	Hs.159557	66617	BX090180
HSI002B09	ARL3	ADP-ribosylation factor-like 3	Hs.182215	22985	BX093135
HSI002B10	MMP9	Matrix metallopeptidase 9 (gelatinase B, 92kDa gelatinase, 92kDa type IV collagenase)	Hs.297413	22040	BX101214
HSI002B11	PLAUR	Plasminogen activator, urokinase receptor	Hs.466871	22790	BX105250
HSI002B12	TSPAN31	Tetraspanin 31	Hs.50984	21934	BX109259
HSI002C01	HECA	Headcase homolog (Drosophila)	Hs.197644	22579	BX090965
HSI002C02	RIT1	Ras-like without CAAX 1	Hs.491234	21834	CR744952
HSI002C03	LRPPRC	Leucine-rich PPR-motif containing	Hs.368084	23756	BX108843
HSI002C04	APC	Adenomatosis polyposis coli	Hs.158932	22243	BX112661
HSI002C05	SPIRE2	Spire homolog 2 (Drosophila)	Hs.461786	23116	R39179
HSI002C06	AGGF1	Angiogenic factor with G patch and FHA domains 1	Hs.213393	24506	BX117865
HSI002C07	CDK4	Cyclin-dependent kinase 4	Hs.95577	23866	BX104215
HSI002C08	BLZF1	Basic leucine zipper nuclear factor 1 (JEM-1)	Hs.130746	23012	BX111563
HSI002C09	CXorf1	Chromosome X open reading frame 1	Hs.106688	23766	BX115389
HSI002C10	TACC2	Transforming, acidic coiled-coil containing protein 2	Hs.501252	23444	BX093311
HSI002C11	GNAS	GNAS complex locus	Hs.125898	23019	BX101450
HSI002C12	EFEMP2	EGF-containing fibulin-like extracellular matrix protein 2	Hs.381870	23448	BX109435
HSI002D01	EML1	Echinoderm microtubule associated protein like 1	Hs.12451	25163	BX113347
HSI002D02	ITSN2	Intersectin 2	Hs.432562	23554	BX091072
HSI002D03	EBNA1BP2	EBNA1 binding protein 2	Hs.346868	22918	BX103133
HSI002D04	ZMYND11	Zinc finger, MYND domain containing 11	Hs.292265	23344	BX111273
HSI002D05	BCS1L	BCS1-like (yeast)	Hs.471401	23769	BX115043
HSI002D06	FIGN	Fidgetin	Hs.170999	108653	BX101827
HSI002D07	DHX57	DEAH (Asp-Glu-Ala-Asp/His) box polypeptide 57	Hs.468226	24623	BX119613
HSI002D08	NMNAT2	Nicotinamide nucleotide adenylyltransferase 2	Hs.497123	24938	BX117353
HSI002D09	CREBL2	CAMP responsive element binding protein-like 2	Hs.13313	24197	BX094915
HSI002D10	ZBTB5	Zinc finger and BTB domain containing 5	Hs.161276	23133	BX099997
HSI002D11	HNRPU	Heterogeneous nuclear ribonucleoprotein U (scaffold attachment factor A)	Hs.166463	22694	BX119755
HSI002D12	TP53	Tumor protein p53 (Li-Fraumeni syndrome)	Hs.408312	24415	BX111932
HSI002E01	NOTCH2	Notch homolog 2 (Drosophila)	Hs.584781	23249	R39199
HSI002E02	MRS2L	MRS2-like, magnesium homeostasis factor (S. cerevisiae)	Hs.533291	24750	BX114390
HSI002E03	RPL22	Ribosomal protein L22	Hs.515329	24526	BX108545
HSI002E04	FLJ10159	Hypothetical protein FLJ10159	Hs.445244	24309	BX101795
HSI002E05	ZNF407	Zinc finger protein 407	Hs.536490	66931	BX102745
HSI002E06	DCHS2	Dachsous 2 (Drosophila)	Hs.148847	23123	BX116428
HSI002E07	ALAS1	Aminolevulinate, delta-, synthase 1	Hs.476308	22940	BX118463
HSI002E08	FOXJ2	Forkhead box J2	Hs.120844	23899	BX090060
HSI002E09	DDHD2	DDHD domain containing 2	Hs.434966	24943	BX093880
HSI002E10	KBTBD11	Kelch repeat and BTB (POZ) domain containing 11	Hs.5333	24550	BX100726
HSI002E11	TRIM11	Tripartite motif-containing 11	Hs.13543	24843	BX110618
HSI002E12	CCDC52	Coiled-coil domain containing 52	Hs.477144	24004	BX110550
HSI002F01	FLNB	Filamin B, beta (actin binding protein 278)	Hs.476448	24965	R38961
HSI002F02	CHPT1	Choline phosphotransferase 1	Hs.293077	24193	BX095836
HSI002F03	C15orf44	Chromosome 15 open reading frame 44	Hs.6686	24437	BX096009
HSI002F04	SELP	Selectin P (granule membrane protein 140kDa, antigen CD62)	Hs.73800	108284	BX110929
HSI002F05	QDPR	Quinoid dihydropteridine reductase	Hs.75438	23776	BX116990
HSI002F06	CREB3L1	CAMP responsive element binding protein 3-like 1	Hs.405961	24747	BX114434
HSI002F07	CRK	V-crk sarcoma virus CT10 oncogene homolog (avian)	Hs.461896	23137	BX094745
HSI002F08	LYPLA2	Lysophospholipase II	Hs.533479	23138	BX113791
HSI002F09	TGDS	TDP-glucose 4,6-dehydratase	Hs.12393	23160	BX107099
HSI002F10	PAQR8	Progestin and adipoQ receptor family member VIII	Hs.239388	23058	BX092516
HSI002F11	EST	Transcribed locus	Hs.507978	23141	BX096484
HSI002F12	ARMC8	Armadillo repeat containing 8	Hs.266826	24864	BX094178
HSI002G01	LEPROTL1	O-acyltransferase (membrane bound) domain containing 4	Hs.146585	23490	BX098386
HSI002G02	C14orf100	Chromosome 14 open reading frame 100	Hs.446850	24119	BX091685
HSI002G03	EST	Transcribed locus	Hs.571201	108868	BX108789
HSI002G04	ZNF423	Zinc finger protein 423	Hs.530930	109107	BX116677
HSI002G05	C1orf66	Chromosome 1 open reading frame 66	Hs.512597	108318	BX094595
HSI002G06	BRUNOL4	Bruno-like 4, RNA binding protein (Drosophila)	Hs.435976	24553	T80269
HSI002G07	LW-1	Family with sequence similarity 11, member A	Hs.534455	24343	BX110775
HSI002G08	RABIF	RAB interacting factor	Hs.90875	24954	BX111434
HSI002G09	MCM6	MCM6 minichromosome maintenance deficient 6 (MIS5 homolog, S. pombe) (S. cerevisiae)	Hs.444118	109169	BX118733
HSI002G10	PLIN	Perilipin	Hs.103253	108330	BX118818
HSI002G11	FTO	Fatso	Hs.528833	23745	BX117486
HSI002G12	C13orf1	Chromosome 13 open reading frame 1	Hs.44235	24667	BX091198
HSI002H01	FKBP9	FK506 binding protein 9, 63 kDa	Hs.103934	22948	BX095037
HSI002H02	NHP2L1	NHP2 non-histone chromosome protein 2-like 1 (S. cerevisiae)	Hs.182255	24869	BX099158
HSI002H03	BACE1	Beta-site APP-cleaving enzyme 1	Hs.504003	23706	BX107455
HSI002H04	MAPK10	Mitogen-activated protein kinase 10	Hs.125503	23173	BX111166
HSI002H05	FAM77C	Family with sequence similarity 77, member C	Hs.470259	24338	BX100917
HSI002H06	TXNDC11	Thioredoxin domain containing 11	Hs.313847	25100	BX094465
HSI002H07	ARL6IP	ADP-ribosylation factor-like 6 interacting protein	Hs.75249	23504	BX107157
HSI002H08	HAT1	Histone acetyltransferase 1	Hs.470611	24027	BX103016
HSI002H09	ANAPC7	Anaphase promoting complex subunit 7	Hs.529280	66919	BX102381
HSI002H10	RARS	Arginyl-tRNA synthetase	Hs.506215	24134	BX101613
HSI002H11	PTPRE	Protein tyrosine phosphatase, receptor type, E	Hs.127022	66972	BX117528
HSI002H12	CRADD	CASP2 and RIPK1 domain containing adaptor with death domain	Hs.38533	24032	BX090696
HSI003A01	ZNF541	Zinc finger protein 541	Hs.14161	108839	BX095292
HSI003A02	FYTTD1	Forty-two-three domain containing 1	Hs.277533	23506	R39253
HSI003A03	SLC7A11	Solute carrier family 7, (cationic amino acid transporter, y+ system) member 11	Hs.390594	23412	BX104317
HSI003A04	PSMD13	Proteasome (prosome, macropain) 26S subunit, non-ATPase, 13	Hs.134688	1690464	BX103348
HSI003A05	SKIV2L2	Superkiller viralicidic activity 2-like 2 (S. cerevisiae)	Hs.274531	23509	BX089356
HSI003A06	C5orf15	Chromosome 5 open reading frame 15	Hs.355177	23825	BX097160
HSI003A07	DGCR8	DiGeorge syndrome critical region gene 8	Hs.533019	66975	BX103512
HSI003A08	AIG1	Androgen-induced 1	Hs.567501	66977	BX104132
HSI003A09	PSMD5	Hypothetical protein LOC253039	Hs.193725	23621	BX092885
HSI003A10	ANGPTL2	Angiopoietin-like 2	Hs.521731	23782	BX096994
HSI003A11	KIF3C	Kinesin family member 3C	Hs.21611	23091	BX118519
HSI003A12	ECE2	Endothelin converting enzyme 2	Hs.146161	24972	BX116474
HSI003B01	FURIN	Furin (paired basic amino acid cleaving enzyme)	Hs.513153	24284	BX104830
HSI003B02	HGF	Hepatocyte growth factor (hepapoietin A; scatter factor)	Hs.396530	25227	BX112476
HSI003B03	RELB	V-rel reticuloendotheliosis viral oncogene homolog B, nuclear factor of kappa light polypeptide gene enhancer in B-cells 3 (avian)	Hs.307905	66969	BX110471
HSI003B04	XKR4	XK, Kell blood group complex subunit-related family, member 4	Hs.130197	25018	BX105819
HSI003B05	PLXDC1	Plexin domain containing 1	Hs.125036	24787	BX102819
HSI003B06	DOCK3	Dedicator of cytokinesis 3	Hs.476284	25143	BX099021
HSI003B07	SNX19	Sorting nexin 19	Hs.444024	66951	BX104015
HSI003B08	C17orf81	Chromosome 17 open reading frame 81	Hs.417029	66953	BX094965
HSI003B09	UNQ5831	KTSR5831	Hs.91910	23323	BX103702
HSI003B10	NELL2	NEL-like 2 (chicken)	Hs.505326	23626	BX116024
HSI003B11	UBXD8	UBX domain containing 8	Hs.484242	22975	BX100778
HSI003B12	ARNTL	Aryl hydrocarbon receptor nuclear translocator-like	Hs.65734	23820	BX105921
HSI003C01	TUBGCP2	Tubulin, gamma complex associated protein 2	Hs.523370	24910	BX110036
HSI003C02	CAMK2G	Calcium/calmodulin-dependent protein kinase (CaM kinase) II gamma	Hs.523045	23426	BX113808
HSI003C03	C6orf106	Chromosome 6 open reading frame 106	Hs.485162	23781	BX117896
HSI003C04	P2RX5	Purinergic receptor P2X, ligand-gated ion channel, 5	Hs.408615	24793	BX095606
HSI003C05	TERF1	Telomeric repeat binding factor (NIMA-interacting) 1	Hs.584810	23530	BX093340
HSI003C06	KIAA0368	KIAA0368	Hs.368255	23958	BX101467
HSI003C07	TIFA	TRAF-interacting protein with a forkhead-associated domain	Hs.310640	1693928	BX100167
HSI003C08	RSU1	Ras suppressor protein 1	Hs.524161	108891	T78930
HSI003C09	CAMK2A	Calcium/calmodulin-dependent protein kinase (CaM kinase) II alpha	Hs.143535	24907	BX089824
HSI003C10	RABGGTA	Rab geranylgeranyltransferase, alpha subunit	Hs.377992	24060	BX098002
HSI003C11	SMOC1	SPARC related modular calcium binding 1	Hs.497349	108449	BX110623
HSI003C12	DPYSL5	Dihydropyrimidinase-like 5	Hs.299315	24701	BX099710
HSI003D01	CD74	CD74 antigen (invariant polypeptide of major histocompatibility complex, class II antigen-associated)	Hs.436568	66999	BX090113
HSI003D02	UBE2L6	Ubiquitin-conjugating enzyme E2L 6	Hs.425777	24277	BX115401
HSI003D03	CSRP2BP	CSRP2 binding protein	Hs.488051	23110	BX094090
HSI003D04	ARID1B	AT rich interactive domain 1B (SWI1-like)	Hs.291587	1696953	BX104788
HSI003D05	SMG7	Smg-7 homolog, nonsense mediated mRNA decay factor (C. elegans)	Hs.270775	23108	CR744194
HSI003D06	TMCC1	Transmembrane and coiled-coil domain family 1	Hs.477547	23192	BX114086
HSI003D07	CAPN2	Calpain 2, (m/II) large subunit	Hs.350899	23643	BX118575
HSI003D08	PABPC4	Poly(A) binding protein, cytoplasmic 4 (inducible form)	Hs.169900	23838	BX115778
HSI003D09	KIAA0895	KIAA0895 protein	Hs.6224	23197	BX093609
HSI003D10	XRCC1	X-ray repair complementing defective repair in Chinese hamster cells 1	Hs.98493	23330	BX101802
HSI003D11	EST	Transcribed locus	Hs.432529	24812	CR743651
HSI003D12	YTHDC2	YTH domain containing 2	Hs.231942	24283	BX090327
HSI003E01	RGS6	Regulator of G-protein signalling 6	Hs.509872	24176	BX111577
HSI003E02	PPT1	Palmitoyl-protein thioesterase 1 (ceroid-lipofuscinosis, neuronal 1, infantile)	Hs.3873	24177	BX115398
HSI003E03	IL22RA1	Interleukin 22 receptor, alpha 1	Hs.110915	67071	BX089163
HSI003E04	EST	Transcribed locus	Hs.135204	1694694	BX100457
HSI003E05	YPEL5	Yippee-like 5 (Drosophila)	Hs.515890	24500	BX109807
HSI003E06	RAP1A	RAP1A, member of RAS oncogene family	Hs.190334	25134	BX108177
HSI003E07	PKP2	Plakophilin 2	Hs.164384	108173	BX092957
HSI003E08	FAM112B	Family with sequence similarity 112, member B	Hs.524476	109045	BX093987
HSI003E09	COX10	COX10 homolog, cytochrome c oxidase assembly protein, heme A: farnesyltransferase (yeast)	Hs.462278	108682	BX094009
HSI003E10	SLC7A9	Solute carrier family 7 (cationic amino acid transporter, y+ system), member 9	Hs.408567	108955	BX098139
HSI003E11	FECH	Ferrochelatase (protoporphyria)	Hs.465221	109338	BX094952
HSI003E12	VRK2	Vaccinia related kinase 2	Hs.468623	108191	BX094979
HSI003F01	DLD	Dihydrolipoamide dehydrogenase (E3 component of pyruvate dehydrogenase complex, 2-oxo-glutarate complex, branched chain keto acid dehydrogenase complex)	Hs.131711	110223	BX097058
HSI003F02	FLJ38109	Hypothetical protein FLJ38109	Hs.558800	110094	BX097092
HSI003F03	KIAA1704	KIAA1704	Hs.507922	110513	BX097960
HSI003F04	SPP2	Secreted phosphoprotein 2, 24kDa	Hs.444488	111637	BX097970
HSI003F05	SLC12A7	Solute carrier family 12 (potassium/chloride transporters), member 7	Hs.172613	109788	BX097989
HSI003F06	LOC388291	Hypothetical LOC388291	Hs.528849	109082	BX100871
HSI003F07	HMGCS2	3-hydroxy-3-methylglutaryl-Coenzyme A synthase 2 (mitochondrial)	Hs.59889	108692	BX101808
HSI003F08	WDR1	WD repeat domain 1	Hs.128548	108671	CR736990
HSI003F09	TSPAN6	Tetraspanin 6	Hs.43233	110136	BX104918
HSI003F10	PCNA	Proliferating cell nuclear antigen	Hs.147433	110931	BX104925
HSI003F11	ZNF37A	Zinc finger protein 37a (KOX 21)	Hs.292575	110139	BX104951
HSI003F12	LGI4	Leucine-rich repeat LGI family, member 4	Hs.65256	110935	BX104974
HSI003G01	EMP2	Epithelial membrane protein 2	Hs.531561	109863	BX105962
HSI003G02	CD3G	CD3G antigen, gamma polypeptide (TiT3 complex)	Hs.2259	110938	BX105974
HSI003G03	C5orf3	Chromosome 5 open reading frame 3	Hs.166551	111999	BX106002
HSI003G04	NDUFB2	NADH dehydrogenase (ubiquinone) 1 beta subcomplex, 2, 8kDa	Hs.567309	109408	CR738101
HSI003G05	PSMB9	Proteasome (prosome, macropain) subunit, beta type, 9 (large multifunctional peptidase 2)	Hs.381081	110169	BX107188
HSI003G06	CAMSAP1	Calmodulin regulated spectrin-associated protein 1	Hs.522493	108345	BX108816
HSI003G07	PSARL	Presenilin associated, rhomboid-like	Hs.478469	66894	BX106502
HSI003G08	GNG2	Guanine nucleotide binding protein (G protein), gamma 2	Hs.187772	109309	BX109709
HSI003G09	FOXO3A	Forkhead box O3A	Hs.220950	109142	BX106027
HSI003G10	C15orf20	Chromosome 15 open reading frame 20	Hs.112160	109816	BX109827
HSI003G11	BCL7C	B-cell CLL/lymphoma 7C	Hs.303197	108238	T69785
HSI003G12	PPARA	Peroxisome proliferative activated receptor, alpha	Hs.534037	109424	BX113616
HSI003H01	EEF1A1	WD repeats and SOF1 domain containing	Hs.439552	110202	CR739538
HSI003H02	ATF2	Activating transcription factor 2	Hs.425104	110999	BX114656
HSI003H03	NUAK1	NUAK family, SNF1-like kinase, 1	Hs.524692	108272	BX116781
HSI003H04	CDC25A	Cell division cycle 25A	Hs.1634	110647	BX114416
HSI003H05	FAM3C	Family with sequence similarity 3, member C	Hs.434053	109214	BX117673
HSI003H06	EWSR1	Ewing sarcoma breakpoint region 1	Hs.374477	108304	BX117874
HSI003H07	MKI67	Antigen identified by monoclonal antibody Ki-67	Hs.80976	108718	BX118911
HSI003H08	DUSP21	Dual specificity phosphatase 21	Hs.534478	109914	BX090578
HSI003H09	EST	Transcribed locus	Hs.576086	111004	T90374
HSI003H10	IER5	Immediate early response 5	Hs.15725	111801	T91137
HSI003H11	DAZAP2	DAZ associated protein 2	Hs.369761	109385	BX091626
HSI003H12	CCDC21	Coiled-coil domain containing 21	Hs.63795	110307	BX098317
HSI004A01	RAB3IL1	RAB3A interacting protein (rabin3)-like 1	Hs.13759	108316	BX094268
HSI004A02	LOC441464	Chromosome 9 open reading frame 31	Hs.585305	110691	BX105946
HSI004A03	SET	SET translocation (myeloid leukemia-associated)	Hs.436687	66900	BX094596
HSI004A04	NAALADL1	N-acetylated alpha-linked acidic dipeptidase-like 1	Hs.13967	108708	BX099491
HSI004A05	ART4	Translin	Hs.13776	108358	BX096478
HSI004A06	MPZL1	Myelin protein zero-like 1	Hs.493919	110693	BX098557
HSI004A07	SURF4	Surfeit 4	Hs.512465	109423	BX098602
HSI004A08	HARS	Histidyl-tRNA synthetase	Hs.528050	109911	BX098698
HSI004A09	GPHN	Gephyrin	Hs.208765	111060	BX099600
HSI004A10	EIF2B1	Eukaryotic translation initiation factor 2B, subunit 1 alpha, 26kDa	Hs.78592	110534	BX100381
HSI004A11	ZFP28	Zinc finger protein 28 homolog (mouse)	Hs.14794	109277	BX102556
HSI004A12	YIPF1	Yip1 domain family, member 1	Hs.11923	108417	BX103263
HSI004B01	CYTL1	Cytokine-like 1	Hs.13872	110293	BX107819
HSI004B02	C3orf50	Chromosome 3 open reading frame 50	Hs.478160	108845	BX099528
HSI004B03	APOM	Apolipoprotein M	Hs.534468	67042	BX100487
HSI004B04	LEAP-2	Liver-expressed antimicrobial peptide 2	Hs.337588	111122	BX106654
HSI004B05	DNM1L	Dynamin 1-like	Hs.556296	110340	BX106872
HSI004B06	DHRS7	Dehydrogenase/reductase (SDR family) member 7	Hs.59719	110379	BX110473
HSI004B07	IPO11	Importin 11	Hs.482269	66909	BX110583
HSI004B08	C10orf42	Chromosome 10 open reading frame 42	Hs.128021	108806	BX111515
HSI004B09	CCL2	Chemokine (C-C motif) ligand 2	Hs.303649	108837	BX113566
HSI004B10	HCCS	NMDA receptor regulated 2	Hs.211571	110417	BX115285
HSI004B11	dJ222E13.2	Similar to CGI-96	Hs.387850	108854	CR744282
HSI004B12	ABCG8	ATP-binding cassette, sub-family G (WHITE), member 8 (sterolin 2)	Hs.413931	111915	CR744389
HSI004C01	ZNF406	Zinc finger protein 406	Hs.446172	111948	BX115214
HSI004C02	ING3	Inhibitor of growth family, member 3	Hs.489811	111164	BX116284
HSI004C03	HP1BP3	Heterochromatin protein 1, binding protein 3	Hs.142442	111571	BX116368
HSI004C04	DPM3	Dolichyl-phosphate mannosyltransferase polypeptide 3	Hs.110477	109278	BX091877
HSI004C05	KIAA1276	KIAA1276 protein	Hs.18861	110356	BX118427
HSI004C06	NDUFS8	NADH dehydrogenase (ubiquinone) Fe-S protein 8, 23kDa (NADH-coenzyme Q reductase)	Hs.90443	108852	BX089200
HSI004C07	CAV2	Caveolin 2	Hs.212332	110467	BX092940
HSI004C08	LOC440820	Similar to breakpoint cluster region isoform 1	Hs.531306	110063	BX090183
HSI004C09	COX6C	Cytochrome c oxidase subunit VIc	Hs.351875	111192	BX091859
HSI004C10	FLJ20551	Hypothetical protein FLJ20551	Hs.369615	110427	BX091970
HSI004C11	POLL	Polymerase (DNA directed), lambda	Hs.523230	109689	BX092013
HSI004C12	NINJ1	Ninjurin 1	Hs.494457	110423	BX092853
HSI004D01	IRF2BP1	Interferon regulatory factor 2 binding protein 1	Hs.515477	109692	BX092873
HSI004D02	ZDHHC16	Zinc finger, DHHC-type containing 16	Hs.76662	109699	BX092995
HSI004D03	RNPC3	RNA-binding region (RNP1, RRM) containing 3	Hs.512635	112780	BX096969
HSI004D04	CDC6	CDC6 cell division cycle 6 homolog (S. cerevisiae)	Hs.405958	112402	BX097002
HSI004D05	FGL1	Fibrinogen-like 1	Hs.491143	112808	BX093998
HSI004D06	EIF2B3	Eukaryotic translation initiation factor 2B, subunit 3 gamma, 58kDa	Hs.533549	110863	BX110023
HSI004D07	EFEMP1	EGF-containing fibulin-like extracellular matrix protein 1	Hs.76224	111647	BX098995
HSI004D08	CSTB	Cystatin B (stefin B)	Hs.695	113205	BX098141
HSI004D09	LARP4	La ribonucleoprotein domain family, member 4	Hs.26613	112865	CR747925
HSI004D10	EXT1	Exostoses (multiple) 1	Hs.492618	111642	BX094035
HSI004D11	HNMT	Histamine N-methyltransferase	Hs.42151	112413	BX094953
HSI004D12	TSEN2	TRNA splicing endonuclease 2 homolog (S. cerevisiae)	Hs.335550	111776	BX104919
HSI004E01	RANBP17	RAN binding protein 17	Hs.410810	110499	BX116784
HSI004E02	SPTA1	Spectrin, alpha, erythrocytic 1 (elliptocytosis 2)	Hs.119825	112016	T91853
HSI004E03	ACF	Apobec-1 complementation factor	Hs.499643	111656	BX101891
HSI004E04	ProSAPiP1	ProSAPiP1 protein	Hs.90232	111840	BX100857
HSI004E05	POFUT1	Protein O-fucosyltransferase 1	Hs.472409	112131	BX100939
HSI004E06	FDFT1	Farnesyl-diphosphate farnesyltransferase 1	Hs.546253	112853	CR737663
HSI004E07	OSBPL2	Oxysterol binding protein-like 2	Hs.473254	111362	BX112591
HSI004E08	RAB34	RAB34, member RAS oncogene family	Hs.301853	113285	BX104953
HSI004E09	GBA3	Glucosidase, beta, acid 3 (cytosolic)	Hs.371763	110613	BX112893
HSI004E10	KIAA1609	KIAA1609 protein	Hs.288274	111353	BX109780
HSI004E11	STAT5B	Signal transducer and activator of transcription 5B	Hs.132864	110589	BX114538
HSI004E12	MASP1	Mannan-binding lectin serine peptidase 1 (C4/C2 activating component of Ra-reactive factor)	Hs.89983	112069	BX108886
HSI004F01	SPAG9	Sperm associated antigen 9	Hs.463439	111730	BX109710
HSI004F02	IHPK2	Inositol hexaphosphate kinase 2	Hs.476221	111749	BX109742
HSI004F03	MLLT10	Myeloid/lymphoid or mixed-lineage leukemia (trithorax homolog, Drosophila); translocated to, 10	Hs.30385	112114	BX109927
HSI004F04	SV2A	Synaptic vesicle glycoprotein 2A	Hs.516153	113295	BX109872
HSI004F05	PHLDB2	Pleckstrin homology-like domain, family B, member 2	Hs.477114	113284	BX090368
HSI004F06	CANX	Calnexin	Hs.529890	113290	BX117631
HSI004F07	ZCCHC9	Zinc finger, CCHC domain containing 9	Hs.15536	111423	BX104019
HSI004F08	CXorf45	Chromosome X open reading frame 45	Hs.443061	113298	BX118776
HSI004F09	ST3GAL1	ST3 beta-galactoside alpha-2,3-sialyltransferase 1	Hs.584803	111753	BX092332
HSI004F10	ZNF582	Zinc finger protein 582	Hs.244391	112275	CR739697
HSI004F11	NDUFB4	NADH dehydrogenase (ubiquinone) 1 beta subcomplex, 4, 15kDa	Hs.304613	112434	BX117591
HSI004F12	BBS4	Bardet-Biedl syndrome 4	Hs.208681	112367	BX118734
HSI004G01	CCNT1	Cyclin T1	Hs.279906	111460	BX098518
HSI004G02	MYO5B	Myosin VB	Hs.567308	112156	BX090806
HSI004G03	CARD8	Caspase recruitment domain family, member 8	Hs.446146	111469	BX112269
HSI004G04	TBC1D7	TBC1 domain family, member 7	Hs.484678	111044	BX099741
HSI004G05	SF4	Splicing factor 4	Hs.515274	110607	BX112403
HSI004G06	AAAS	Achalasia, adrenocortical insufficiency, alacrimia (Allgrove, triple-A)	Hs.369144	111445	BX100536
HSI004G07	MANBA	Mannosidase, beta A, lysosomal	Hs.480415	112207	BX094269
HSI004G08	CUL4A	Cullin 4A	Hs.339735	112593	BX095135
HSI004G09	C1orf57	Chromosome 1 open reading frame 57	Hs.16034	112521	BX095452
HSI004G10	SYNC1	Syncoilin, intermediate filament 1	Hs.584980	112525	BX096271
HSI004G11	LSM3	LSM3 homolog, U6 small nuclear RNA associated (S. cerevisiae)	Hs.111632	112246	BX096371
HSI004G12	ADHFE1	Alcohol dehydrogenase, iron containing, 1	Hs.268869	112218	BX096479
HSI004H01	HNRPU	Heterogeneous nuclear ribonucleoprotein U (scaffold attachment factor A)	Hs.166463	110731	BX118430
HSI004H02	C1QB	Complement component 1, q subcomponent, B chain	Hs.8986	112128	BX106434
HSI004H03	ANPEP	Alanyl (membrane) aminopeptidase (aminopeptidase N, aminopeptidase M, microsomal aminopeptidase, CD13, p150)	Hs.1239	113398	BX104134
HSI004H04	USP13	Ubiquitin specific peptidase 13 (isopeptidase T-3)	Hs.175322	112586	BX102558
HSI004H05	PPP2R3A	Protein phosphatase 2 (formerly 2A), regulatory subunit B'', alpha	Hs.518155	113052	BX102619
HSI004H06	SNX11	Sorting nexin 11	Hs.15827	112173	BX103891
HSI004H07	ZNF297	Zinc finger protein 297	Hs.206770	113424	BX110356
HSI004H08	C20orf74	Chromosome 20 open reading frame 74	Hs.472285	112344	BX119455
HSI004H09	CAT	Catalase	Hs.502302	111572	BX111485
HSI004H10	EST	Transcribed locus		113493
HSI004H11	CEP27	Centrosomal protein 27kDa	Hs.14347	113451	BX110393
HSI004H12	TRIM58	Tripartite motif-containing 58	Hs.323858	113481	BX110624
HSI005A01	MAN2B2	Mannosidase, alpha, class 2B, member 2	Hs.188464	112501	CR743977
HSI005A02	HOOK1	Hook homolog 1 (Drosophila)	Hs.378836	113403	BX118356
HSI005A03	CIRH1A	Cirrhosis, autosomal recessive 1A (cirhin)	Hs.461113	111985	CR745168
HSI005A04	ARHGEF9	Cdc42 guanine nucleotide exchange factor (GEF) 9	Hs.54697	111465	BX092015
HSI005A05	ARL1	ADP-ribosylation factor-like 1	Hs.372616	113533	BX116331
HSI005A06	UBA2	SUMO-1 activating enzyme subunit 2	Hs.511739	113515	BX089324
HSI005A07	C21orf25	Chromosome 21 open reading frame 25	Hs.473894	112390	BX090151
HSI005A08	TBP	TATA box binding protein	Hs.1100	113517	BX090116
HSI005A09	KEAP1	Kelch-like ECH-associated protein 1	Hs.465870	112673	BX090208
HSI005A10	C11orf1	Chromosome 11 open reading frame 1	Hs.17546	114223	BX097020
HSI005A11	MYO1G	Myosin IG	Hs.37617	1696406	BX106471
HSI005A12	SLC4A1	Solute carrier family 4, anion exchanger, member 1 (erythrocyte membrane protein band 3, Diego blood group)	Hs.443948	115143	BX101830
HSI005B01	STAMBPL1	STAM binding protein-like 1	Hs.584943	115266	BX101974
HSI005B02	KIAA0376	KIAA0376 protein	Hs.474384	115080	BX108927
HSI005B03	DERL2	Der1-like domain family, member 2	Hs.286131	115185	BX109017
HSI005B04	TSPAN3	Tetraspanin 3	Hs.5062	115191	BX109874
HSI005B05	F11R	F11 receptor	Hs.517293	115348	BX116635
HSI005B06	COX17	COX17 homolog, cytochrome c oxidase assembly protein (yeast)	Hs.534383	115279	BX094462
HSI005B07	ZNF490	Zinc finger protein 490	Hs.175475	115180	BX095189
HSI005B08	EHBP1	EH domain binding protein 1	Hs.271667	115192	BX096424
HSI005B09	COG4	Component of oligomeric golgi complex 4	Hs.208680	115325	BX102518
HSI005B10	EST	Transcribed locus	Hs.524293	115351	T86967
HSI005B11	TNFSF13B	Tumor necrosis factor (ligand) superfamily, member 13b	Hs.525157	115371	BX110396
HSI005B12	RASIP1	Ras interacting protein 1	Hs.233955	115454	BX089325
HSI005C01	GPR65	G protein-coupled receptor 65	Hs.513440	115277	BX093977
HSI005C02	CTDSPL	CTD (carboxy-terminal domain, RNA polymerase II, polypeptide A) small phosphatase-like	Hs.475963	120112	BX097990
HSI005C03	TSC1	Tuberous sclerosis 1	Hs.370854	120107	T95059
HSI005C04	C11orf1	Chromosome 11 open reading frame 1	Hs.17546	120460	BX097021
HSI005C05	ST3GAL5	ST3 beta-galactoside alpha-2,3-sialyltransferase 5	Hs.415117	120864	BX097059
HSI005C06	CYP4A11	Cytochrome P450, family 4, subfamily A, polypeptide 11	Hs.1645	120466	BX097936
HSI005C07	ERCC1	Excision repair cross-complementing rodent repair deficiency, complementation group 1 (includes overlapping antisense sequence)	Hs.435981	120468	BX097972
HSI005C08	HCG9	HLA complex group 9	Hs.511741	120850	BX097961
HSI005C09	EST	Transcribed locus	Hs.507027	120113	BX098106
HSI005C10	ORC1L	Origin recognition complex, subunit 1-like (yeast)	Hs.17908	121313	BX110476
HSI005C11	DHX38	DEAH (Asp-Glu-Ala-His) box polypeptide 38	Hs.127092	120090	BX098961
HSI005C12	ALDH4A1	Aldehyde dehydrogenase 4 family, member A1	Hs.77448	121267	BX098144
HSI005D01	BECN1	Beclin 1 (coiled-coil, myosin-like BCL2 interacting protein)	Hs.12272	120156	BX105009
HSI005D02	AMPD3	Adenosine monophosphate deaminase (isoform E)	Hs.501890	120146	BX104911
HSI005D03	ACY1	Aminoacylase 1	Hs.334707	120522	BX106174
HSI005D04	STAT6	Signal transducer and activator of transcription 6, interleukin-4 induced	Hs.524518	120184	BX107210
HSI005D05	POLG	Polymerase (DNA directed), gamma	Hs.549058	115095	BX101895
HSI005D06	CAMSAP1	Calmodulin regulated spectrin-associated protein 1	Hs.522493	120964	BX112592
HSI005D07	PLCD4	Phospholipase C, delta 4	Hs.567627	120197	BX112723
HSI005D08	MGC16169	Hypothetical protein MGC16169	Hs.292986	120191	BX112829
HSI005D09	MGST3	Microsomal glutathione S-transferase 3	Hs.191734	120202	BX113433
HSI005D10	ELF4	E74-like factor 4 (ets domain transcription factor)	Hs.271940	120944	BX112896
HSI005D11	PLA1A	Phospholipase A1 member A	Hs.437451	120969	BX113726
HSI005D12	HNRPA1	Heterogeneous nuclear ribonucleoprotein A1	Hs.546261	121361	BX113863
HSI005E01	SLC40A1	Solute carrier family 40 (iron-regulated transporter), member 1	Hs.529285	121430	BX114539
HSI005E02	FUK	Fucokinase	Hs.7907	120595	BX091628
HSI005E03	COL12A1	Collagen, type XII, alpha 1	Hs.101302	120622	BX118864
HSI005E04	AGA	Aspartylglucosaminidase	Hs.207776	120986	BX090459
HSI005E05	SLC7A6OS	Solute carrier family 7, member 6 opposite strand	Hs.334848	121383	BX090693
HSI005E06	BCAS3	Breast carcinoma amplified sequence 3	Hs.463702	120599	BX091377
HSI005E07	CASP1	Caspase 1, apoptosis-related cysteine peptidase (interleukin 1, beta, convertase)	Hs.2490	120106	BX091488
HSI005E08	SH3BP4	SH3-domain binding protein 4	Hs.516777	120257	BX091683
HSI005E09	CUEDC1	CUE domain containing 1	Hs.46679	120114	BX092396
HSI005E10	RSAD2	Radical S-adenosyl methionine domain containing 2	Hs.17518	120600	T95113
HSI005E11	C9orf3	Chromosome 9 open reading frame 3	Hs.434253	121505	BX099647
HSI005E12	AFF4	AF4/FMR2 family, member 4	Hs.519313	121110	BX106743
HSI005F01	HSD17B2	Hydroxysteroid (17-beta) dehydrogenase 2	Hs.162795	121091	BX107714
HSI005F02	LAD1	Ladinin 1	Hs.519035	121551	BX107960
HSI005F03	ZNF278	Zinc finger protein 278	Hs.517557	121096	BX108066
HSI005F04	RCE1	RCE1 homolog, prenyl protein peptidase (S. cerevisiae)	Hs.553511	120357	BX108413
HSI005F05	HERC6	Hect domain and RLD 6	Hs.529317	120358	BX116335
HSI005F06	C15orf39	Chromosome 15 open reading frame 39	Hs.17936	121159	BX115322
HSI005F07	TIRAP	Toll-interleukin 1 receptor (TIR) domain containing adaptor protein	Hs.537126	120375	BX115395
HSI005F08	GRAMD1A	GRAM domain containing 1A	Hs.515351	121145	BX115368
HSI005F09	EST	Transcribed locus	Hs.381113	120273	BX116188
HSI005F10	USP38	Ubiquitin specific peptidase 38	Hs.480848	120381	BX116289
HSI005F11	WNK4	WNK lysine deficient protein kinase 4	Hs.105448	115326	BX118400
HSI005F12	GPD1L	Glycerol-3-phosphate dehydrogenase 1-like	Hs.82432	120374	BX118534
HSI005G01	POLR3C	Polymerase (RNA) III (DNA directed) polypeptide C (62kD)	Hs.584853	120398	BX093964
HSI005G02	HBXIP	Hepatitis B virus x interacting protein	Hs.439815	121591	BX092018
HSI005G03	EST	Transcribed locus	Hs.541584	121954	BX092919
HSI005G04	DIO3OS	Deiodinase, iodothyronine, type III opposite strand	Hs.525597	120431	BX093976
HSI005G05	KHSRP	KH-type splicing regulatory protein (FUSE binding protein 2)	Hs.91142	121248	BX096988
HSI005G06	UBXD5	UBX domain containing 5	Hs.145061	121239	BX092920
HSI005G07	CLMN	Calmin (calponin-like, transmembrane)	Hs.301478	121231	BX097022
HSI005G08	CSMD1	CUB and Sushi multiple domains 1	Hs.571466	121285	BX093965
HSI005G09	IDI2	Isopentenyl-diphosphate delta isomerase 2	Hs.9270	120910	BX094981
HSI005G10	HDAC8	Histone deacetylase 8	Hs.310536	122425	BX097048
HSI005G11	DYNLT1	Dynein, light chain, Tctex-type 1	Hs.445999	123557	BX096970
HSI005G12	TESC	Tescalcin	Hs.525709	123293	BX097003
HSI005H01	RTF1	Rtf1, Paf1/RNA polymerase II complex component, homolog (S. cerevisiae)	Hs.511096	1705031	BX118350
HSI005H02	ZNF218	Zinc finger protein 218	Hs.473117	122047	BX097962
HSI005H03	C4BPA	Complement component 4 binding protein, alpha	Hs.1012	123664	BX098031
HSI005H04	LUZP5	Leucine zipper protein 5	Hs.18616	122397	BX098984
HSI005H05	PPRC1	Peroxisome proliferative activated receptor, gamma, coactivator-related 1	Hs.533551	123232	BX098075
HSI005H06	CEP164	Centrosomal protein 164kDa	Hs.504009	122443	BX099012
HSI005H07	ERBB3	V-erb-b2 erythroblastic leukemia viral oncogene homolog 3 (avian)	Hs.567263	123164	BX098146
HSI005H08	ZNF297B	Zinc finger protein 297B	Hs.355581	122396	BX098962
HSI005H09	TUG1	Taurine upregulated gene 1	Hs.584922	123236	BX098973
HSI005H10	NOL1	Nucleolar protein 1, 120kDa	Hs.534334	121613	BX101752
HSI005H11	CDA08	T-cell immunomodulatory protein	Hs.42217	121646	BX106089
HSI005H12	EST	Transcribed locus	Hs.18343	122042	BX104901
HSI006A01	EST	Transcribed locus	Hs.439159	122043	BX104920
HSI006A02	JUNB	Jun B proto-oncogene	Hs.25292	122428	BX100858
HSI006A03	SLC2A4RG	SLC2A4 regulator	Hs.435126	122442	BX107263
HSI006A04	ARHGAP21	Rho GTPase activating protein 21	Hs.524195	120577	BX108777
HSI006A05	HTATIP2	HIV-1 Tat interactive protein 2, 30kDa	Hs.90753	120965	BX113569
HSI006A06	CASP9	Caspase 9, apoptosis-related cysteine peptidase	Hs.329502	121693	BX113674
HSI006A07	PCDH1	Protocadherin 1 (cadherin-like 1)	Hs.79769	121045	BX110028
HSI006A08	PARS2	Prolyl-tRNA synthetase (mitochondrial)(putative)	Hs.380169	121478	BX110932
HSI006A09	ENOSF1	Enolase superfamily member 1	Hs.584931	121754	BX112677
HSI006A10	NOPE	Likely ortholog of mouse neighbor of Punc E11	Hs.458607	122507	BX112773
HSI006A11	CCDC55	Coiled-coil domain containing 55	Hs.462663	122034	BX113866
HSI006A12	NUP210	Nucleoporin 210kDa	Hs.475525	122782	BX114540
HSI006B01	TNRC9	Trinucleotide repeat containing 9	Hs.460789	121392	BX098323
HSI006B02	AHSG	Alpha-2-HS-glycoprotein	Hs.324746	120458	BX116587
HSI006B03	C1orf54	Chromosome 1 open reading frame 54	Hs.91283	122169	BX090751
HSI006B04	ORMDL3	ORM1-like 3 (S. cerevisiae)	Hs.514151	121514	BX117594
HSI006B05	FLJ34077	Weakly similar to zinc finger protein 195	Hs.538374	121839	BX117676
HSI006B06	ADRBK2	Adrenergic, beta, receptor kinase 2	Hs.584740	121618	BX091490
HSI006B07	UBADC1	Ubiquitin associated domain containing 1	Hs.9194	122199	BX091577
HSI006B08	PPP2R2A	Protein phosphatase 2 (formerly 2A), regulatory subunit B (PR 52), alpha isoform	Hs.146339	121794	BX117882
HSI006B09	SLC25A11	Solute carrier family 25 (mitochondrial carrier; oxoglutarate carrier), member 11	Hs.184877	121460	BX118821
HSI006B10	ETS1	V-ets erythroblastosis virus E26 oncogene homolog 1 (avian)	Hs.369438	121438	BX118916
HSI006B11	ACYP1	Acylphosphatase 1, erythrocyte (common) type	Hs.18573	122808	BX104912
HSI006B12	NSUN3	NOL1/NOP2/Sun domain family, member 3	Hs.401062	122933	BX090417
HSI006C01	GBE1	Glucan (1,4-alpha-), branching enzyme 1 (glycogen branching enzyme, Andersen disease, glycogen storage disease type IV)	Hs.436062	122217	BX090460
HSI006C02	OTUD5	OTU domain containing 5	Hs.496098	122937	BX090809
HSI006C03	DHX33	DEAH (Asp-Glu-Ala-His) box polypeptide 33	Hs.250456	122083	BX091736
HSI006C04	PACS2	Phosphofurin acidic cluster sorting protein 2	Hs.525626	123689	BX092335
HSI006C05	HSPC111	Hypothetical protein HSPC111	Hs.529475	121755	BX098478
HSI006C06	SUSD1	Sushi domain containing 1	Hs.494827	121781	BX098648
HSI006C07	KIAA0446	KIAA0446 gene product	Hs.532375	121496	BX095136
HSI006C08	RAD18	RAD18 homolog (S. cerevisiae)	Hs.375684	120516	T95314
HSI006C09	BAG1	BCL2-associated athanogene	Hs.377484	121479	T97294
HSI006C10	WDFY2	WD repeat and FYVE domain containing 2	Hs.208550	121458	BX099703
HSI006C11	HAVCR2	Hepatitis A virus cellular receptor 2	Hs.155111	121124	BX096374
HSI006C12	MIS12	MIS12 homolog (yeast)	Hs.267194	121676	BX100576
HSI006D01	TNFAIP8L2	Tumor necrosis factor, alpha-induced protein 8-like 2	Hs.16179	123724	BX098426
HSI006D02	SCAP1	Src family associated phosphoprotein 1	Hs.316931	123730	BX099494
HSI006D03	C20orf177	Chromosome 20 open reading frame 177	Hs.504920	122255	BX099745
HSI006D04	DTNA	Dystrobrevin, alpha	Hs.58919	121156	BX102559
HSI006D05	BAZ2B	Bromodomain adjacent to zinc finger domain, 2B	Hs.470369	121718	T97986
HSI006D06	KIAA0232	KIAA0232 gene product	Hs.79276	121558	BX104654
HSI006D07	WDR19	WD repeat domain 19	Hs.438482	121875	BX107767
HSI006D08	NFATC3	Nuclear factor of activated T-cells, cytoplasmic, calcineurin-dependent 3	Hs.341716	123249	BX106877
HSI006D09	YPEL4	Yippee-like 4 (Drosophila)	Hs.135978	123033	BX106972
HSI006D10	SEC31L2	SEC31-like 2 (S. cerevisiae)	Hs.18889	123037	BX107827
HSI006D11	TFR2	Transferrin receptor 2	Hs.544932	121746	BX119458
HSI006D12	JMJD3	Jumonji domain containing 3	Hs.223678	121772	T98184
HSI006E01	CRTC1	CREB regulated transcription coactivator 1	Hs.371096	120528	BX110358
HSI006E02	ELK3	ELK3, ETS-domain protein (SRF accessory protein 2)	Hs.46523	122282	BX110517
HSI006E03	EIF4EBP2	Eukaryotic translation initiation factor 4E binding protein 2	Hs.522995	121583	BX112345
HSI006E04	SMARCB1	SWI/SNF related, matrix associated, actin dependent regulator of chromatin, subfamily b, member 1	Hs.534350	121605	BX112404
HSI006E05	CNN2	Calponin 2	Hs.169718	121916	BX116370
HSI006E06	LANCL2	LanC lantibiotic synthetase component C-like 2 (bacterial)	Hs.224282	122331	BX114396
HSI006E07	ZNF37A	Zinc finger protein 37a (KOX 21)	Hs.292575	122362	BX115397
HSI006E08	SUPT3H	Suppressor of Ty 3 homolog (S. cerevisiae)	Hs.368325	123089	BX115370
HSI006E09	ARRB2	Arrestin, beta 2	Hs.435811	121560	BX091880
HSI006E10	SPSB1	SplA/ryanodine receptor domain and SOCS box containing 1	Hs.8261	121577	BX118363
HSI006E11	CGRRF1	Cell growth regulator with ring finger domain 1	Hs.59106	122160	BX092843
HSI006E12	PSMF1	Proteasome (prosome, macropain) inhibitor subunit 1 (PI31)	Hs.471917	120803	BX089168
HSI006F01	KIAA0492	KIAA0492 protein	Hs.567549	121191	BX089231
HSI006F02	PLAC8	Placenta-specific 8	Hs.546392	121906	BX090211
HSI006F03	DSG1	Desmoglein 1	Hs.2633	122743	BX091896
HSI006F04	IFRD1	Interferon-related developmental regulator 1	Hs.7879	121948	BX092897
HSI006F05	ABHD5	Abhydrolase domain containing 5	Hs.19385	123347	BX092020
HSI006F06	SLC2A14	Solute carrier family 2 (facilitated glucose transporter), member 14	Hs.210227	121981	BX093895
HSI006F07	MTRR	5-methyltetrahydrofolate-homocysteine methyltransferase reductase	Hs.481551	121985	BX093000
HSI006F08	MAP3K10	Mitogen-activated protein kinase kinase kinase 10	Hs.466743	122178	BX093966
HSI006F09	MRPL15	Mitochondrial ribosomal protein L15	Hs.18349	123529	BX096971
HSI006F10	RBJ	Ras-associated protein Rap1	Hs.434993	123602	BX097061
HSI006F11	MFAP3L	Microfibrillar-associated protein 3-like	Hs.178121	124320	BX092863
HSI006F12	SMARCE1	SWI/SNF related, matrix associated, actin dependent regulator of chromatin, subfamily e, member 1	Hs.463010	124323	BX092922
HSI006G01	ZNF511	Zinc finger protein 511	Hs.422113	124325	R02105
HSI006G02	MED4	Mediator of RNA polymerase II transcription, subunit 4 homolog (yeast)	Hs.181112	124705	BX092980
HSI006G03	IFNAR2	Interferon (alpha, beta and omega) receptor 2	Hs.512211	123950	BX093020
HSI006G04	DLAT	Dihydrolipoamide S-acetyltransferase (E2 component of pyruvate dehydrogenase complex)	Hs.335551	124303	BX093967
HSI006G05	UBE2D4	Hypothetical protein LOC222070	Hs.19196	123929	BX093978
HSI006G06	TMEM88	Transmembrane protein 88	Hs.389669	123543	BX094011
HSI006G07	TMEM43	Transmembrane protein 43	Hs.517817	123934	BX094968
HSI006G08	TCEAL4	Transcription elongation factor A (SII)-like 4	Hs.194329	123580	BX104938
HSI006G09	CSE1L	CSE1 chromosome segregation 1-like (yeast)	Hs.90073	122814	BX105965
HSI006G10	SRGAP1	SLIT-ROBO Rho GTPase activating protein 1	Hs.450763	123581	BX102747
HSI006G11	SLC2A2	Solute carrier family 2 (facilitated glucose transporter), member 2	Hs.167584	123579	BX100873
HSI006G12	HTR3A	5-hydroxytryptamine (serotonin) receptor 3A	Hs.413899	124280	BX100919
HSI006H01	GFRA2	GDNF family receptor alpha 2	Hs.441202	124377	BX101753
HSI006H02	ZBED4	Zinc finger, BED-type containing 4	Hs.475208	124351	BX101780
HSI006H03	ACP5	Acid phosphatase 5, tartrate resistant	Hs.1211	125101	BX101772
HSI006H04	GLYAT	Glycine-N-acyltransferase	Hs.145384	124365	BX101864
HSI006H05	RCL1	RNA terminal phosphate cyclase-like 1	Hs.194121	125148	BX101833
HSI006H06	TRIAD3	TRIAD3 protein	Hs.487458	124791	BX101897
HSI006H07	GALNT14	UDP-N-acetyl-alpha-D-galactosamine:polypeptide N-acetylgalactosaminyltransferase 14 (GalNAc-T14)	Hs.468058	124006	BX102810
HSI006H08	C1orf37	Chromosome 1 open reading frame 37	Hs.497443	124391	BX102786
HSI006H09	RAB11FIP4	RAB11 family interacting protein 4 (class II)	Hs.406788	122857	BX112560
HSI006H10	ZFYVE26	Zinc finger, FYVE domain containing 26	Hs.98041	122861	BX112682
HSI006H11	ENAH	Enabled homolog (Drosophila)	Hs.497893	124369	BX112778
HSI006H12	NEIL2	Nei like 2 (E. coli)	Hs.293818	123750	BX112902
HSI007A01	KIAA1429	KIAA1429	Hs.202238	122873	BX113732
HSI007A02	AGTR1	Angiotensin II receptor, type 1	Hs.477887	123933	BX106176
HSI007A03	RNF4	Ring finger protein 4	Hs.66394	123652	BX108892
HSI007A04	NFATC2IP	Nuclear factor of activated T-cells, cytoplasmic, calcineurin-dependent 2 interacting protein	Hs.513470	124087	BX108971
HSI007A05	MBTPS1	Membrane-bound transcription factor peptidase, site 1	Hs.75890	124040	BX109712
HSI007A06	PAIP2	Poly(A) binding protein interacting protein 2	Hs.396644	124402	BX109729
HSI007A07	C8orf50	Chromosome 8 open reading frame 50	Hs.265165	1703464	BX108653
HSI007A08	ZNF346	Zinc finger protein 346	Hs.484259	124046	BX109933
HSI007A09	ABHD5	Abhydrolase domain containing 5	Hs.19385	124022	BX109879
HSI007A10	MMS19L	MMS19-like (MET18 homolog, S. cerevisiae)	Hs.500721	123679	BX116741
HSI007A11	MFAP1	Microfibrillar-associated protein 1	Hs.61418	123802	BX091435
HSI007A12	STX7	Syntaxin 7	Hs.520383	122919	BX091534
HSI007B01	LOC441909	Similar to KIAA1606 protein	Hs.585330	123329	BX115184
HSI007B02	AP3B1	Adaptor-related protein complex 3, beta 1 subunit	Hs.532091	123092	BX110849
HSI007B03	CNIH	Cornichon homolog (Drosophila)	Hs.294603	123743	BX092459
HSI007B04	SENP8	SUMO/sentrin specific peptidase family member 8	Hs.513002	123692	BX110934
HSI007B05	CARD4	Caspase recruitment domain family, member 4	Hs.405153	124082	BX116589
HSI007B06	RAC1	Ras-related C3 botulinum toxin substrate 1 (rho family, small GTP binding protein Rac1)	Hs.413812	124875	BX116639
HSI007B07	ABCE1	ATP-binding cassette, sub-family E (OABP), member 1	Hs.12013	124471	BX116792
HSI007B08	ASB9	Ankyrin repeat and SOCS box-containing 9	Hs.19404	124071	BX117678
HSI007B09	PFKFB4	6-phosphofructo-2-kinase/fructose-2,6-biphosphatase 4	Hs.476217	124452	BX117634
HSI007B10	DKFZP761H1710	Hypothetical protein DKFZp761H1710	Hs.512767	124143	BX117773
HSI007B11	POP5	Processing of precursor 5, ribonuclease P/MRP subunit (S. cerevisiae)	Hs.279913	125244	BX117723
HSI007B12	DDB2	LIM homeobox 3	Hs.446564	124428	BX117885
HSI007C01	BCL2L13	BCL2-like 13 (apoptosis facilitator)	Hs.118681	122976	BX098382
HSI007C02	GRN	Granulin	Hs.514220	122965	BX099531
HSI007C03	HDHD3	Haloacid dehalogenase-like hydrolase domain containing 3	Hs.7739	123756	BX099571
HSI007C04	S100A12	S100 calcium binding protein A12 (calgranulin C)	Hs.19413	123640	BX092856
HSI007C05	PLEKHG6	Pleckstrin homology domain containing, family G (with RhoGef domain) member 6	Hs.163953	123742	BX100541
HSI007C06	TRMU	TRNA 5-methylaminomethyl-2-thiouridylate methyltransferase	Hs.439524	124134	BX094531
HSI007C07	RAPGEF5	Rap guanine nucleotide exchange factor (GEF) 5	Hs.174768	124902	BX095137
HSI007C08	PHF20L1	PHD finger protein 20-like 1	Hs.304362	124191	R01276
HSI007C09	ZNF200	Zinc finger protein 200	Hs.513288	124575	BX104234
HSI007C10	C15orf15	Chromosome 15 open reading frame 15	Hs.274772	124560	BX102256
HSI007C11	NDUFA7	NADH dehydrogenase (ubiquinone) 1 alpha subcomplex, 7, 14.5kDa	Hs.333427	125334	BX102656
HSI007C12	NDUFB5	NADH dehydrogenase (ubiquinone) 1 beta subcomplex, 5, 16kDa	Hs.518424	124123	BX103521
HSI007D01	CCL3	Chemokine (C-C motif) ligand 3	Hs.514107	125723	BX103455
HSI007D02	CSF1	Colony stimulating factor 1 (macrophage)	Hs.173894	124554	BX104265
HSI007D03	ACTR2	ARP2 actin-related protein 2 homolog (yeast)	Hs.393201	123504	BX114211
HSI007D04	FST	Follistatin	Hs.9914	124543	BX110400
HSI007D05	G6PC	Glucose-6-phosphatase, catalytic (glycogen storage disease type I, von Gierke disease)	Hs.212293	124592	BX110477
HSI007D06	SART1	Squamous cell carcinoma antigen recognised by T cells	Hs.502883	123056	BX114441
HSI007D07	MEG3	Maternally expressed 3	Hs.568182	124565	BX111451
HSI007D08	TFDP2	Transcription factor Dp-2 (E2F dimerization partner 2)	Hs.379018	124294	BX108068
HSI007D09	ATPBD1B	ATP binding domain 1 family, member B	Hs.14333	124559	BX116341
HSI007D10	MRPS26	Mitochondrial ribosomal protein S26	Hs.18946	123454	BX104656
HSI007D11	PALLD	Palladin, cytoskeletal associated protein	Hs.151220	124594	BX111395
HSI007D12	MOBK1B	MOB1, Mps One Binder kinase activator-like 1B (yeast)	Hs.196437	125295	BX111541
HSI007E01	LOC92689	Hypothetical protein BC001096	Hs.476517	125756	BX111616
HSI007E02	ZNF10	Zinc finger protein 10	Hs.507355	124578	BX112405
HSI007E03	GSR	Glutathione reductase	Hs.271510	125176	BX112378
HSI007E04	MGC3260	Hypothetical protein MGC3260	Hs.570357	123482	BX091897
HSI007E05	GCGR	Glucagon receptor	Hs.208	124201	BX114160
HSI007E06	VCP	Valosin-containing protein	Hs.529782	123873	BX092923
HSI007E07	GCN5L2	GCN5 general control of amino-acid synthesis 5-like 2 (yeast)	Hs.463045	123136	BX092963
HSI007E08	DDX18	DEAD (Asp-Glu-Ala-Asp) box polypeptide 18	Hs.363492	123835	BX090213
HSI007E09	ZSWIM3	Zinc finger, SWIM-type containing 3	Hs.292135	126581	BX118471
HSI007E10	MGC2654	LP8272	Hs.306380	125339	BX089205
HSI007E11	KIAA0484	KIAA0484 protein	Hs.495632	125056	BX090122
HSI007E12	hfl-B5	Dendritic cell protein	Hs.502244	124733	BX092945
HSI007F01	TUBAL3	Tubulin, alpha-like 3	Hs.163079	125145	BX097071
HSI007F02	PSMB3	Proteasome (prosome, macropain) subunit, beta type, 3	Hs.82793	124693	BX093947
HSI007F03	KIAA0859	KIAA0859	Hs.494705	125080	BX094025
HSI007F04	EST	Transcribed locus	Hs.570219	1703488	BX102173
HSI007F05	MGMT	O-6-methylguanine-DNA methyltransferase	Hs.501522	126309	BX094941
HSI007F06	QSER1	Glutamine and serine rich 1	Hs.369368	125086	BX098985
HSI007F07	ATF5	Activating transcription factor 5	Hs.9754	127059	BX100902
HSI007F08	GLT1D1	Glycosyltransferase 1 domain containing 1	Hs.12381	126325	BX093002
HSI007F09	FBXO27	F-box protein 27	Hs.187461	127024	BX093921
HSI007F10	ORAOV1	Oral cancer overexpressed 1	Hs.523854	127239	CR736119
HSI007F11	GCKR	Glucokinase (hexokinase 4) regulator	Hs.89771	126617	BX101812
HSI007F12	CARM1	Coactivator-associated arginine methyltransferase 1	Hs.371416	127004	BX098148
HSI007G01	SUDS3	Suppressor of defective silencing 3 homolog (S. cerevisiae)	Hs.416630	127168	BX094955
HSI007G02	GRAP2	GRB2-related adaptor protein 2	Hs.517499	124760	BX100847
HSI007G03	ERCC2	Excision repair cross-complementing rodent repair deficiency, complementation group 2 (xeroderma pigmentosum D)	Hs.487294	125187	BX104913
HSI007G04	TUBGCP3	Tubulin, gamma complex associated protein 3	Hs.224152	125670	BX100889
HSI007G05	CHES1	Checkpoint suppressor 1	Hs.434286	124720	R01024
HSI007G06	STEAP4	STEAP family member 4	Hs.521008	126266	BX104933
HSI007G07	ECD	Ecdysoneless homolog (Drosophila)	Hs.446373	126295	BX100942
HSI007G08	ATP6V1F	ATPase, H+ transporting, lysosomal 14kDa, V1 subunit F	Hs.78089	126278	BX093021
HSI007G09	LOC146909	Hypothetical protein LOC146909	Hs.135094	1704605	BX100379
HSI007G10	ANKS1A	Ankyrin repeat and sterile alpha motif domain containing 1A	Hs.132639	127028	BX094969
HSI007G11	C2orf32	Chromosome 2 open reading frame 32	Hs.212885	126722	BX108824
HSI007G12	FLJ12684	Hypothetical protein FLJ12684	Hs.363087	127061	BX100922
HSI007H01	TP53AP1	TP53 activated protein 1	Hs.274329	126349	BX110032
HSI007H02	VPS4B	Vacuolar protein sorting 4B (yeast)	Hs.126550	124708	BX116546
HSI007H03	PEX1	Peroxisome biogenesis factor 1	Hs.164682	125653	BX090754
HSI007H04	FAM111A	Family with sequence similarity 111, member A	Hs.150651	125240	BX091275
HSI007H05	GALE	UDP-galactose-4-epimerase	Hs.557524	126404	BX117827
HSI007H06	RNF12	Ring finger protein 12	Hs.550150	125250	BX092273
HSI007H07	ACO1	Aconitase 1, soluble	Hs.567229	126725	BX102388
HSI007H08	DTL	Denticleless homolog (Drosophila)	Hs.126774	126650	BX094174
HSI007H09	GATA1	GATA binding protein 1 (globin transcription factor 1)	Hs.765	126368	BX090462
HSI007H10	IPO13	Importin 13	Hs.158497	126461	BX116797
HSI007H11	CD5L	CD5 antigen-like (scavenger receptor cysteine rich family)	Hs.134035	126392	BX094535
HSI007H12	SMTN	Smoothelin	Hs.149098	126776	BX090810
HSI008A01	ITGA5	Sorting nexin 11	Hs.505654	126399	BX091686
HSI008A02	EDN1	Endothelin 1	Hs.511899	125596	BX098479
HSI008A03	C1orf2	Chromosome 1 open reading frame 2	Hs.348308	125314	BX095192
HSI008A04	FHIT	Nasopharyngeal carcinoma, down-regulated 1	Hs.196981	125273	BX095299
HSI008A05	FXYD2	FXYD domain containing ion transport regulator 2	Hs.413137	125222	BX095407
HSI008A06	CNIH4	Cornichon homolog 4 (Drosophila)	Hs.445890	125199	BX099605
HSI008A07	ZNF76	Zinc finger protein 76 (expressed in testis)	Hs.388024	125674	BX095537
HSI008A08	NAPG	N-ethylmaleimide-sensitive factor attachment protein, gamma	Hs.464622	125399	BX099705
HSI008A09	CLDN4	Claudin 4	Hs.520942	125278	BX096428
HSI008A10	ZC3H7A	Zinc finger CCCH-type containing 7A	Hs.371856	125207	BX100577
HSI008A11	SAP30BP	SAP30 binding protein	Hs.257077	126816	BX098324
HSI008A12	CTH	Cystathionase (cystathionine gamma-lyase)	Hs.19904	126795	BX094409
HSI008B01	PSME4	Proteasome (prosome, macropain) activator subunit 4	Hs.413801	127169	BX096273
HSI008B02	HFE	Hemochromatosis	Hs.233325	125808	BX106516
HSI008B03	ZNF589	Zinc finger protein 589	Hs.19585	124922	BX106442
HSI008B04	EIF3S10	Eukaryotic translation initiation factor 3, subunit 10 theta, 150/170kDa	Hs.523299	125261	BX106586
HSI008B05	MPO	Myeloperoxidase	Hs.458272	125308	BX106821
HSI008B06	TCF7L2	Transcription factor 7-like 2 (T-cell specific, HMG-box)	Hs.501080	124907	BX103333
HSI008B07	PLEK	Pleckstrin	Hs.468840	124911	BX103588
HSI008B08	FCN1	Ficolin (collagen/fibrinogen domain containing) 1	Hs.440898	124913	BX104184
HSI008B09	TTC17	Tetratricopeptide repeat domain 17	Hs.191186	124743	BX104266
HSI008B10	SLC29A3	Solute carrier family 29 (nucleoside transporters), member 3	Hs.438419	126851	BX089135
HSI008B11	MVK	Mevalonate kinase (mevalonic aciduria)	Hs.130607	126474	BX107829
HSI008B12	ATP6V0E	ATPase, H+ transporting, lysosomal 9kDa, V0 subunit e	Hs.484188	126789	BX108486
HSI008C01	IFIT5	Interferon-induced protein with tetratricopeptide repeats 5	Hs.252839	125665	BX114212
HSI008C02	PARVB	Parvin, beta	Hs.475074	124951	BX110557
HSI008C03	TBC1D22A	TBC1 domain family, member 22A	Hs.435044	125797	BX114419
HSI008C04	USP31	Ubiquitin specific peptidase 31	Hs.183817	125831	BX115399
HSI008C05	KLF3	Kruppel-like factor 3 (basic)	Hs.298658	126519	BX116195
HSI008C06	ANXA9	Annexin A9	Hs.430324	124967	BX112382
HSI008C07	FANCA	Fanconi anemia, complementation group A	Hs.567267	126796	BX114297
HSI008C08	SEMA4G	Sema domain, immunoglobulin domain (Ig), transmembrane domain (TM) and short cytoplasmic domain, (semaphorin) 4G	Hs.567556	127289	BX090089
HSI008C09	FLJ23191	Hypothetical protein FLJ23191	Hs.90250	126814	BX102787
HSI008C10	ANKRD36	Protein immuno-reactive with anti-PTH polyclonal antibodies	Hs.434930	124829	CR745338
HSI008C11	C14orf32	Chromosome 14 open reading frame 32	Hs.437831	125408	BX092844
HSI008C12	CA14	Carbonic anhydrase XIV	Hs.528988	125823	BX092864
HSI008D01	MMAB	Methylmalonic aciduria (cobalamin deficiency) cblB type	Hs.12106	126595	CR744907
HSI008D02	NDST3	N-deacetylase/N-sulfotransferase (heparan glucosaminyl) 3	Hs.480596	125806	BX090124
HSI008D03	NDUFS2	NADH dehydrogenase (ubiquinone) Fe-S protein 2, 49kDa (NADH-coenzyme Q reductase)	Hs.173611	125010	BX090189
HSI008D04	ADRB2	Adrenergic, beta-2-, receptor, surface	Hs.2551	127360	BX092021
HSI008D05	SLC22A18AS	Solute carrier family 22 (organic cation transporter), member 18 antisense	Hs.300076	126856	BX092944
HSI008D06	C14orf142	Chromosome 14 open reading frame 142	Hs.20142	127264	BX111617
HSI008D07	BTBD4	BTB (POZ) domain containing 4	Hs.585028	126862	BX093946
HSI008D08	ILF3	Interleukin enhancer binding factor 3, 90kDa	Hs.465885	128136	BX100848
HSI008D09	ET	Hypothetical protein ET	Hs.73965	127776	BX104922
HSI008D10	RAI14	Retinoic acid induced 14	Hs.431400	127802	BX092965
HSI008D11	PSMB8	Proteasome (prosome, macropain) subunit, beta type, 8 (large multifunctional peptidase 7)	Hs.180062	128146	BX105966
HSI008D12	DIDO1	Death inducer-obliterator 1	Hs.15783	129293	BX097024
HSI008E01	ITIH3	Inter-alpha (globulin) inhibitor H3	Hs.76716	128982	BX097063
HSI008E02	SNTB1	Syntrophin, beta 1 (dystrophin-associated protein A1, 59kDa, basic component 1)	Hs.567339	128530	BX097977
HSI008E03	SOX13	SRY (sex determining region Y)-box 13	Hs.201671	129348	BX094012
HSI008E04	STAMBP	STAM binding protein	Hs.183070	127775	BX098151
HSI008E05	BARD1	BRCA1 associated RING domain 1	Hs.54089	128171	BX098964
HSI008E06	RHOU	Ras homolog gene family, member U	Hs.435106	127900	BX100860
HSI008E07	CDH11	Cadherin 11, type 2, OB-cadherin (osteoblast)	Hs.116471	127515	BX100874
HSI008E08	WDR79	WD repeat domain 79	Hs.437460	128210	BX112684
HSI008E09	DNAJB1	DnaJ (Hsp40) homolog, subfamily B, member 1	Hs.515210	127810	BX113461
HSI008E10	FLJ10847	Hypothetical protein FLJ10847	Hs.232054	127443	BX101865
HSI008E11	CAMKK2	Calcium/calmodulin-dependent protein kinase kinase 2, beta	Hs.297343	128198	BX109884
HSI008E12	SIAH2	Seven in absentia homolog 2 (Drosophila)	Hs.477959	127789	BX110898
HSI008F01	MRPS18B	Mitochondrial ribosomal protein S18B	Hs.274417	128595	BX104934
HSI008F02	HGD	Homogentisate 1,2-dioxygenase (homogentisate oxidase)	Hs.368254	127783	BX101754
HSI008F03	TRIM10	Tripartite motif-containing 10	Hs.274295	128945	BX106141
HSI008F04	AP1M1	Adaptor-related protein complex 1, mu 1 subunit	Hs.71040	128637	BX107167
HSI008F05	TPR	Translocated promoter region (to activated MET oncogene)	Hs.279640	128159	BX102748
HSI008F06	OGFRL1	Opioid growth factor receptor-like 1	Hs.567577	127924	BX112732
HSI008F07	EST	Transcribed locus		127496
HSI008F08	VPS41	Vacuolar protein sorting 41 (yeast)	Hs.148721	127498	BX113483
HSI008F09	CIDEC	Cell death-inducing DFFA-like effector c	Hs.276310	127500	BX113576
HSI008F10	PSG1	Pregnancy specific beta-1-glycoprotein 10	Hs.584793	127882	CR740018
HSI008F11	MGC4692	Hypothetical protein LOC283871	Hs.442634	127551	BX109989
HSI008F12	STX4A	Syntaxin 4A (placental)	Hs.83734	127833	BX091742
HSI008G01	DUSP16	Dual specificity phosphatase 16	Hs.536535	127508	BX110818
HSI008G02	APCDD1	Adenomatosis polyposis coli down-regulated 1	Hs.293274	128956	BX112598
HSI008G03	ARAF	V-raf murine sarcoma 3611 viral oncogene homolog	Hs.446641	128669	BX112634
HSI008G04	RBM21	RNA binding motif protein 21	Hs.256184	128632	BX113801
HSI008G05	SIAE	Sialic acid acetylesterase	Hs.10056	128975	BX113872
HSI008G06	LDHD	Lactate dehydrogenase D	Hs.380929	127486	BX114620
HSI008G07	MLYCD	Malonyl-CoA decarboxylase	Hs.461571	127540	BX090645
HSI008G08	MARCO	Macrophage receptor with collagenous structure	Hs.67726	128000	BX117532
HSI008G09	JARID1B	Jumonji, AT rich interactive domain 1B (RBP2-like)	Hs.443650	127619	BX117566
HSI008G10	FLJ13231	Hypothetical protein FLJ13231	Hs.481936	127621	BX091492
HSI008G11	GMEB1	Glucocorticoid modulatory element binding protein 1	Hs.4069	129005	BX090373
HSI008G12	FOSB	FBJ murine osteosarcoma viral oncogene homolog B	Hs.75678	128702	BX091438
HSI008H01	MAD2L1	MAD2 mitotic arrest deficient-like 1 (yeast)	Hs.559215	129140	BX092337
HSI008H02	VPS11	Vacuolar protein sorting 11 (yeast)	Hs.234282	128331	BX102258
HSI008H03	UBE2H	Ubiquitin-conjugating enzyme E2H (UBC8 homolog, yeast)	Hs.344165	128011	BX099497
HSI008H04	DDX17	DEAD (Asp-Glu-Ala-Asp) box polypeptide 17	Hs.528305	127578	BX100496
HSI008H05	BAZ2A	Bromodomain adjacent to zinc finger domain, 2A	Hs.314263	1693893	BX119221
HSI008H06	ACY3	Aspartoacylase (aminocyclase) 3	Hs.126265	129128	BX099342
HSI008H07	MAFB	V-maf musculoaponeurotic fibrosarcoma oncogene homolog B (avian)	Hs.169487	129564	BX095138
HSI008H08	SLC15A3	Solute carrier family 15, member 3	Hs.237856	127958	BX099653
HSI008H09	DCP1A	DCP1 decapping enzyme homolog A (S. cerevisiae)	Hs.476353	128730	BX100388
HSI008H10	RP11-125A7.3	KIAA0564 protein	Hs.368282	127634	BX106663
HSI008H11	CD36	CD36 antigen (collagen type I receptor, thrombospondin receptor)	Hs.120949	127648	BX104186
HSI008H12	UBE3B	Ubiquitin protein ligase E3B	Hs.374067	129175	BX106747
HSI009A01	HBXAP	Hepatitis B virus x associated protein	Hs.420229	128792	BX106929
HSI009A02	ZNF138	Zinc finger protein 138	Hs.530045	128795	BX106973
HSI009A03	DLC1	Deleted in liver cancer 1	Hs.134296	128787	BX107675
HSI009A04	FLJ20209	Hypothetical protein FLJ20209	Hs.528655	128763	BX107772
HSI009A05	CSTF3	Hypothetical protein LOC283267	Hs.44402	129183	BX107830
HSI009A06	LRRC51	Leucine rich repeat containing 51	Hs.317243	128035	CR743538
HSI009A07	KIAA0182	KIAA0182	Hs.461647	128784	BX108546
HSI009A08	ZDHHC2	Zinc finger, DHHC-type containing 2	Hs.443852	127682	BX110435
HSI009A09	C21orf66	Chromosome 21 open reading frame 66	Hs.473635	127658	BX110519
HSI009A10	MKI67IP	MKI67 (FHA domain) interacting nucleolar phosphoprotein	Hs.367842	128090	BX091935
HSI009A11	CDK7	Cyclin-dependent kinase 7 (MO15 homolog, Xenopus laevis, cdk-activating kinase)	Hs.184298	127671	BX111344
HSI009A12	NFKBIB	Nuclear factor of kappa light polypeptide gene enhancer in B-cells inhibitor, beta	Hs.9731	127620	BX111397
HSI009B01	YWHAZ	Tyrosine 3-monooxygenase/tryptophan 5-monooxygenase activation protein, zeta polypeptide	Hs.492407	128436	BX092878
HSI009B02	KIAA0319L	KIAA0319-like	Hs.456507	127678	BX090125
HSI009B03	WDR40A	WD repeat domain 40A	Hs.493750	128041	BX114265
HSI009B04	PDCD5	Programmed cell death 5	Hs.443831	129176	BX114336
HSI009B05	ADD1	Adducin 1 (alpha)	Hs.183706	128834	BX115289
HSI009B06	C6orf57	Chromosome 6 open reading frame 57	Hs.418495	129641	BX115326
HSI009B07	PCDHGC3	Protocadherin gamma subfamily A, 12	Hs.368160	129159	BX115351
HSI009B08	ASCC2	Activating signal cointegrator 1 complex subunit 2	Hs.517438	129166	CR745919
HSI009B09	C15orf42	Chromosome 15 open reading frame 42	Hs.441708	1693122	BX089227
HSI009B10	SKIP	Skeletal muscle and kidney enriched inositol phosphatase	Hs.178347	127715	BX118438
HSI009B11	PXDN	Peroxidasin homolog (Drosophila)	Hs.332197	127740	BX092900
HSI009B12	SCARA3	Scavenger receptor class A, member 3	Hs.128856	128515	BX092946
HSI009C01	SMAD1	SMAD, mothers against DPP homolog 1 (Drosophila)	Hs.519005	128882	BX091882
HSI009C02	SEZ6L2	Seizure related 6 homolog (mouse)-like 2	Hs.6314	128891	BX092022
HSI009C03	PSEN2	Presenilin 2 (Alzheimer disease 4)	Hs.25363	128731	BX093003
HSI009C04	MRPL40	Mitochondrial ribosomal protein L40	Hs.431307	129260	BX093897
HSI009C05	ZBTB9	Zinc finger and BTB domain containing 9	Hs.520072	129238	CR748948
HSI009C06	CUGBP1	CUG triplet repeat, RNA binding protein 1	Hs.530727	25588	BX089112
HSI009C07	FAM65A	Family with sequence similarity 65, member A	Hs.152717	129707	BX102815
HSI009C08	BIRC6	Splicing factor, arginine/serine-rich 12	Hs.150107	129335	BX094970
HSI009C09	TXNDC14	Thioredoxin domain containing 14	Hs.279861	129311	BX094000
HSI009C10	PLD3	Phospholipase D family, member 3	Hs.257008	26004	BX102668
HSI009C11	SNX26	Sorting nexin 26	Hs.515364	25797	BX089560
HSI009C12	KIF21B	Kinesin family member 21B	Hs.169182	25900	BX090136
HSI009D01	DYRK1A	Dual-specificity tyrosine-(Y)-phosphorylation regulated kinase 1A	Hs.368240	1692828	BX117274
HSI009D02	CDC20	CDC20 cell division cycle 20 homolog (S. cerevisiae)	Hs.524947	129381	BX117893
HSI009D03	VDAC1	Voltage-dependent anion channel 1	Hs.519320	129751	BX100866
HSI009D04	HSPA2	Heat shock 70kDa protein 2	Hs.432648	129370	BX103401
HSI009D05	FSTL1	Follistatin-like 1	Hs.269512	1692779	BX115037
HSI009D06	RHOBTB1	Rho-related BTB domain containing 1	Hs.148670	129396	BX094049
HSI009D07	AMIGO1	Adhesion molecule with Ig-like domain 1	Hs.12264	129789	BX102788
HSI009D08	ELF2	E74-like factor 2 (ets domain transcription factor)	Hs.480763	26130	CR737168
HSI009D09	C14orf153	Chromosome 14 open reading frame 153	Hs.116029	26865	R13667
HSI009D10	CLIC1	Chloride intracellular channel 1	Hs.414565	26125	BX104760
HSI009D11	MGC15912	Hypothetical protein MGC15912	Hs.534506	129726	BX094537
HSI009D12	RetSat	All-trans-13,14-dihydroretinol saturase	Hs.440401	25698	BX112648
HSI009E01	SH3GL2	SH3-domain GRB2-like 2	Hs.75149	26249	BX090546
HSI009E02	TRAF4	TNF receptor-associated factor 4	Hs.8375	26128	BX102483
HSI009E03	MARCKS	Myristoylated alanine-rich protein kinase C substrate	Hs.519909	26572	BX106699
HSI009E04	DNER	Delta-notch-like EGF repeat-containing transmembrane	Hs.234074	25810	BX114311
HSI009E05	RP11-54H7.1	Myosin heavy chain Myr 8	Hs.368522	26447	BX092165
HSI009E06	ZNF586	Zinc finger protein 586	Hs.469601	1688412	BX117189
HSI009E07	ARMCX5	Armadillo repeat containing, X-linked 5	Hs.522729	25359	BX093028
HSI009E08	SMARCA2	SWI/SNF related, matrix associated, actin dependent regulator of chromatin, subfamily a, member 2	Hs.298990	128962	BX109731
HSI009E09	NDUFB8	NADH dehydrogenase (ubiquinone) 1 beta subcomplex, 8, 19kDa	Hs.523215	25515	BX118797
HSI009E10	CUTL1	Cut-like 1, CCAAT displacement protein (Drosophila)	Hs.191482	25304	BX118135
HSI009E11	BTD	Biotinidase	Hs.517830	25517	BX104888
HSI009E12	LOC400713	Zinc finger-like	Hs.502314	1696463	BX110982
HSI009F01	EST	Transcribed locus	Hs.570590	26562	CR738374
HSI009F02	ZNF581	Zinc finger protein 581	Hs.20768	129465	BX109714
HSI009F03	DDAH2	Dimethylarginine dimethylaminohydrolase 2	Hs.247362	26055	BX112930
HSI009F04	CYP4F12	Cytochrome P450, family 4, subfamily F, polypeptide 12	Hs.131459	129446	BX109837
HSI009F05	SIN3A	SIN3 homolog A, transcription regulator (yeast)	Hs.513039	26455	BX096938
HSI009F06	C12orf30	Chromosome 12 open reading frame 30	Hs.530941	26914	BX110830
HSI009F07	A2M	Alpha-2-macroglobulin	Hs.212838	25715	BX114556
HSI009F08	SLC30A10	Solute carrier family 30, member 10	Hs.519812	25930	BX108758
HSI009F09	UNC84A	Unc-84 homolog A (C. elegans)	Hs.438072	25398	BX109676
HSI009F10	RAD17	RAD17 homolog (S. pombe)	Hs.16184	128309	BX100903
HSI009F11	SPAG7	Sperm associated antigen 7	Hs.90436	129505	BX116693
HSI009F12	C7orf23	Chromosome 7 open reading frame 23	Hs.196129	129466	BX116747
HSI009G01	LOC440309	LOC440309	Hs.459403	25507	BX094305
HSI009G02	HIST1H2BJ	Histone 1, H2bj	Hs.132550	129467	BX101782
HSI009G03	ST7L	Suppression of tumorigenicity 7 like	Hs.201921	129070	CR748337
HSI009G04	ANLN	Anillin, actin binding protein (scraps homolog, Drosophila)	Hs.62180	128711	BX118779
HSI009G05	HUWE1	HECT, UBA and WWE domain containing 1	Hs.136905	26682	BX093728
HSI009G06	CLCN7	Chloride channel 7	Hs.459649	26367	BX105890
HSI009G07	CLCN6	Chloride channel 6	Hs.193043	26151	BX113417
HSI009G08	FOS	V-fos FBJ murine osteosarcoma viral oncogene homolog	Hs.25647	26474	BX091171
HSI009G09	EST	Transcribed locus		1690106
HSI009G10	SCUBE2	Signal peptide, CUB domain, EGF-like 2	Hs.523468	1691237	BX114287
HSI009G11	ELAVL3	ELAV (embryonic lethal, abnormal vision, Drosophila)-like 3 (Hu antigen C)	Hs.1701	26582	BX103957
HSI009G12	PAFAH1B3	Platelet-activating factor acetylhydrolase, isoform Ib, gamma subunit 29kDa	Hs.466831	26467	BX092931
HSI009H01	NEO1	Neogenin homolog 1 (chicken)	Hs.388613	25942	CR740169
HSI009H02	USP32	Ubiquitin specific peptidase 32	Hs.132868	26692	BX113281
HSI009H03	RCD-8	Autoantigen	Hs.75682	25353	BX095726
HSI009H04	DOK5	Docking protein 5	Hs.473133	25664	BX104371
HSI009H05	UBE2B	Ubiquitin-conjugating enzyme E2B (RAD6 homolog)	Hs.385986	129501	BX095539
HSI009H06	CSMD3	CUB and Sushi multiple domains 3	Hs.91381	25465	BX091310
HSI009H07	SNX9	Sorting nexin 9	Hs.191213	26056	BX106234
HSI009H08	RANBP5	RAN binding protein 5	Hs.513057	25814	BX113952
HSI009H09	WNK2	WNK lysine deficient protein kinase 2	Hs.522291	25950	BX099796
HSI009H10	G3BP2	Ras-GTPase activating protein SH3 domain-binding protein 2	Hs.303676	25829	CR748459
HSI009H11	FADD	Fas (TNFRSF6)-associated via death domain	Hs.86131	26167	BX115644
HSI009H12	C4A	Complement component 4B (Childo blood group)	Hs.534847	26063	CR741408
HSI010A01	PSME1	Proteasome (prosome, macropain) activator subunit 1 (PA28 alpha)	Hs.75348	25849	BX101560
HSI010A02	ARL8A	ADP-ribosylation factor-like 8A	Hs.497399	25455	R39847
HSI010A03	KCNH3	Potassium voltage-gated channel, subfamily H (eag-related), member 3	Hs.64064	26487	BX095172
HSI010A04	DNM1	Dynamin 1	Hs.522413	25551	BX090255
HSI010A05	NUP210	Nucleoporin 210kDa	Hs.475525	25643	BX097031
HSI010A06	HIAT1	Hippocampus abundant transcript 1	Hs.124156	25364	BX114481
HSI010A07	RABGGTB	Rab geranylgeranyltransferase, beta subunit	Hs.78948	26949	BX104551
HSI010A08	SV2B	Synaptic vesicle glycoprotein 2B	Hs.21754	26510	BX091116
HSI010A09	EIF3S6	Eukaryotic translation initiation factor 3, subunit 6 48kDa	Hs.405590	25964	BX116414
HSI010A10	PAX5	Paired box gene 5 (B-cell lineage specific activator)	Hs.126365	129613	CR742721
HSI010A11	CCHCR1	Coiled-coil alpha-helical rod protein 1	Hs.485075	25843	BX094003
HSI010A12	FAM20B	Family with sequence similarity 20, member B	Hs.5737	25343	BX109909
HSI010B01	SETDB1	SET domain, bifurcated 1	Hs.516278	25755	BX117756
HSI010B02	PFKP	Phosphofructokinase, platelet	Hs.26010	26184	BX104332
HSI010B03	FCN3	Ficolin (collagen/fibrinogen domain containing) 3 (Hakata antigen)	Hs.333383	129964	BX110478
HSI010B04	EST	Transcribed locus	Hs.299043	1693542	BX113292
HSI010B05	TM4SF18	Transmembrane 4 L six family member 18	Hs.22026	129610	BX110559
HSI010B06	raptor	Raptor	Hs.133044	129628	BX110592
HSI010B07	RPUSD4	RNA pseudouridylate synthase domain containing 4	Hs.150458	130005	BX095462
HSI010B08	PIK3R1	Phosphoinositide-3-kinase, regulatory subunit 1 (p85 alpha)	Hs.132225	25354	BX092036
HSI010B09	CETP	Cholesteryl ester transfer protein, plasma	Hs.89538	129988	BX110628
HSI010B10	ATP1B1	ATPase, Na+/K+ transporting, beta 1 polypeptide	Hs.291196	25433	BX099376
HSI010B11	PRPF38A	PRP38 pre-mRNA processing factor 38 (yeast) domain containing A	Hs.5301	25678	BX116276
HSI010B12	FEM1B	Fem-1 homolog b (C. elegans)	Hs.362733	25344	CR743800
HSI010C01	TMEM106C	Transmembrane protein 106C	Hs.103834	129983	BX112313
HSI010C02	FMNL1	Formin-like 1	Hs.100217	25975	BX107009
HSI010C03	CTCF	CCCTC-binding factor (zinc finger protein)	Hs.368367	26029	BX116444
HSI010C04	MXI1	MAX interactor 1	Hs.501023	26084	BX094635
HSI010C05	ST13	Suppression of tumorigenicity 13 (colon carcinoma) (Hsp70 interacting protein)	Hs.546303	25655	BX114455
HSI010C06	SORCS2	Sortilin-related VPS10 domain containing receptor 2	Hs.479099	25980	BX110646
HSI010C07	ALDH18A1	Aldehyde dehydrogenase 18 family, member A1	Hs.500645	26406	BX118550
HSI010C08	SLC11A2	Solute carrier family 11 (proton-coupled divalent metal ion transporters), member 2	Hs.505545	25555	BX091084
HSI010C09	SGCB	Sarcoglycan, beta (43kDa dystrophin-associated glycoprotein)	Hs.438953	25556	BX095973
HSI010C10	MARK2	MAP/microtubule affinity-regulating kinase 2	Hs.567261	25665	BX112443
HSI010C11	ATP6V1B2	ATPase, H+ transporting, lysosomal 56/58kDa, V1 subunit B2	Hs.295917	129661	BX089208
HSI010C12	REV1L	REV1-like (yeast)	Hs.443077	130044	CR744766
HSI010D01	PPP2R5C	Protein phosphatase 2, regulatory subunit B (B56), gamma isoform	Hs.368264	129640	BX103903
HSI010D02	MAP2	Microtubule-associated protein 2	Hs.368281	1690107	BX119773
HSI010D03	CD37	CD37 antigen	Hs.166556	26202	BX113180
HSI010D04	MAOB	Monoamine oxidase B	Hs.46732	26094	BX109261
HSI010D05	HSDL1	Hydroxysteroid dehydrogenase like 1	Hs.555992	26629	R13588
HSI010D06	PTP4A1	Protein tyrosine phosphatase type IVA, member 1	Hs.227777	26097	BX102912
HSI010D07	CNR1	Cannabinoid receptor 1 (brain)	Hs.75110	26295	BX111066
HSI010D08	RFNG	Radical fringe homolog (Drosophila)	Hs.569700	26579	BX104773
HSI010D09	PRPS1	Phosphoribosyl pyrophosphate synthetase 1	Hs.56	26210	BX112663
HSI010D10	STK25	Serine/threonine kinase 25 (STE20 homolog, yeast)	Hs.516807	26050	BX090566
HSI010D11	PROM1	Prominin 1	Hs.479220	27544	BX099263
HSI010D12	FGFR2	Fibroblast growth factor receptor 2 (bacteria-expressed kinase, keratinocyte growth factor receptor, craniofacial dysostosis 1, Crouzon syndrome, Pfeiffer syndrome, Jackson-Weiss syndrome)	Hs.533683	26871	BX098727
HSI010E01	ATAD1	ATPase family, AAA domain containing 1	Hs.435948	26005	BX097401
HSI010E02	NUDCD3	NudC domain containing 3	Hs.488171	26756	BX114066
HSI010E03	GSS	Glutathione synthetase	Hs.82327	28239	BX117867
HSI010E04	ADORA1	Adenosine A1 receptor	Hs.77867	30159	BX111565
HSI010E05	MYO10	Myosin X	Hs.481720	28796	BX105540
HSI010E06	HDAC5	Histone deacetylase 5	Hs.438782	28995	BX109439
HSI010E07	MICAL3	Microtubule associated monoxygenase, calponin and LIM domain containing 3	Hs.528024	28249	BX107583
HSI010E08	C13orf7	Chromosome 13 open reading frame 7	Hs.567576	29310	BX094916
HSI010E09	TTK	TTK protein kinase	Hs.169840	29739	BX103137
HSI010E10	GLRB	Glycine receptor, beta	Hs.32973	28471	CR737022
HSI010E11	ETNK2	Ethanolamine kinase 2	Hs.497469	29797	BX091837
HSI010E12	MECP2	Methyl CpG binding protein 2 (Rett syndrome)	Hs.200716	27706	BX107339
HSI010F01	EST	Transcribed locus	Hs.55452	29004	CR737193
HSI010F02	MAGEH1	Melanoma antigen family H, 1	Hs.279819	27510	BX115056
HSI010F03	PPP2R2D	Protein phosphatase 2, regulatory subunit B, delta isoform	Hs.380372	27083	BX106004
HSI010F04	ITPKC	Inositol 1,4,5-trisphosphate 3-kinase C	Hs.515415	26878	BX113517
HSI010F05	ACAA2	Acetyl-Coenzyme A acyltransferase 2 (mitochondrial 3-oxoacyl-Coenzyme A thiolase)	Hs.200136	28580	BX110454
HSI010F06	MEIS2	Meis1, myeloid ecotropic viral integration site 1 homolog 2 (mouse)	Hs.510989	28688	R40740
HSI010F07	TCF4	Transcription factor 4	Hs.200285	28689	BX096145
HSI010F08	NDUFV1	NADH dehydrogenase (ubiquinone) flavoprotein 1, 51kDa	Hs.7744	27529	BX102906
HSI010F09	DUSP9	Dual specificity phosphatase 9	Hs.144879	28678	BX092067
HSI010F10	FGF1	Fibroblast growth factor 1 (acidic)	Hs.483635	29949	BX119756
HSI010F11	LYPD1	LY6/PLAUR domain containing 1	Hs.432395	29218	BX101796
HSI010F12	SLC9A1	Solute carrier family 9 (sodium/hydrogen exchanger), member 1 (antiporter, Na+/H+, amiloride sensitive)	Hs.469116	30272	BX112649
HSI010G01	NUP93	Nucleoporin 93kDa	Hs.276878	29220	BX098501
HSI010G02	TRIM5	Tripartite motif-containing pseudogene 1	Hs.370515	29808	R42235
HSI010G03	CENTD2	Centaurin, delta 2	Hs.503165	27930	BX115490
HSI010G04	PAK4	P21(CDKN1A)-activated kinase 4	Hs.20447	28775	BX100227
HSI010G05	WWC1	WW, C2 and coiled-coil domain containing 1	Hs.484047	27748	BX104832
HSI010G06	PIB5PA	Phosphatidylinositol (4,5) bisphosphate 5-phosphatase, A	Hs.517549	27392	BX102670
HSI010G07	CTNNA2	Catenin (cadherin-associated protein), alpha 2	Hs.167368	27532	BX099998
HSI010G08	TRPM7	Transient receptor potential cation channel, subfamily M, member 7	Hs.512894	1703418	BX090954
HSI010G09	HERC1	Hect (homologous to the E6-AP (UBE3A) carboxyl terminus) domain and RCC1 (CHC1)-like domain (RLD) 1	Hs.210385	28896	BX109034
HSI010G10	MAL2	Mal, T-cell differentiation protein 2	Hs.201083	27751	BX098100
HSI010G11	OLIG2	Oligodendrocyte lineage transcription factor 2	Hs.176977	26884	BX117415
HSI010G12	PARC	P53-associated parkin-like cytoplasmic protein	Hs.485434	26989	BX106874
HSI010H01	KIAA1239	KIAA1239 protein	Hs.4280	27938	BX091974
HSI010H02	DULLARD	Dullard homolog (Xenopus laevis)	Hs.513913	26674	BX114392
HSI010H03	VPS35	Vacuolar protein sorting 35 (yeast)	Hs.454528	27286	BX116152
HSI010H04	SPARCL1	SPARC-like 1 (mast9, hevin)	Hs.62886	27956	BX112537
HSI010H05	CAMLG	Calcium modulating ligand	Hs.529846	27516	BX111055
HSI010H06	FAM49A	Family with sequence similarity 49, member A	Hs.467769	28465	BX111653
HSI010H07	ESD	Esterase D/formylglutathione hydrolase	Hs.432491	27818	BX116429
HSI010H08	DCAMKL1	Doublecortin and CaM kinase-like 1	Hs.507755	28587	BX097107
HSI010H09	WIBG	Within bgcn homolog (Drosophila)	Hs.505687	28484	BX114790
HSI010H10	CDC42EP2	CDC42 effector protein (Rho GTPase binding) 2	Hs.343380	29964	BX101921
HSI010H11	STRN3	Striatin, calmodulin binding protein 3	Hs.401843	29629	BX110552
HSI010H12	COX11	COX11 homolog, cytochrome c oxidase assembly protein (yeast)	Hs.96530	28259	BX104348
HSI011A01	PARP6	Poly (ADP-ribose) polymerase family, member 6	Hs.270244	1704569	BX089186
HSI011A02	EST	Transcribed locus		1692613
HSI011A03	EST	Transcribed locus	Hs.521338	1704205	BX114951
HSI011A04	EST	Transcribed locus	Hs.145804	1704940	BX090734
HSI011A05	GDDR	Down-regulated in gastric cancer GDDR	Hs.16757	1693411	BX099686
HSI011A06	TMEM30B	Transmembrane protein 30B	Hs.146180	1693078	BX097492
HSI011A07	EST	Transcribed locus	Hs.443715	1693054	BX096359
HSI011A08	EST	Transcribed locus		1691199
HSI011A09	EST	Transcribed locus		1694199
HSI011A10	LOC168850	Hypothetical protein LOC168850	Hs.159006	1693810	BX093420
HSI011A11	EST	Transcribed locus		1693323
HSI011A12	EST	Transcribed locus	Hs.444405	1705626	BX101722
HSI011B01	SETD7	SET domain containing (lysine methyltransferase) 7	Hs.480792	1707160	BX099837
HSI011B02	FKBP4	N-myristoyltransferase 2	Hs.524183	28606	BX104658
HSI011B03	WSB2	WD repeat and SOCS box-containing 2	Hs.506985	29981	BX115338
HSI011B04	SYPL2	Synaptophysin-like 2	Hs.528366	1706795	BX093337
HSI011B05	ZNF30	Zinc finger protein 30 (KOX 28)	Hs.135052	1704147	BX099268
HSI011B06	EST	Transcribed locus	Hs.134221	1694925	BX108242
HSI011B07	EST	Transcribed locus	Hs.175569	1689070	BX107587
HSI011B08	AOC2	Amine oxidase, copper containing 2 (retina-specific)	Hs.143102	28921	BX116991
HSI011B09	VSIG4	V-set and immunoglobulin domain containing 4	Hs.8904	26928	BX117487
HSI011B10	PLP1	Proteolipid protein 1 (Pelizaeus-Merzbacher disease, spastic paraplegia 2, uncomplicated)	Hs.1787	27308	BX100920
HSI011B11	SFXN1	Sideroflexin 1	Hs.369440	27689	BX113446
HSI011B12	LOC125893	Hypothetical protein LOC125893	Hs.446907	1691110	BX111645
HSI011C01	EST	Transcribed locus	Hs.380698	1690695	BX107905
HSI011C02	TSPAN13	Tetraspanin 13	Hs.364544	27811	BX098389
HSI011C03	CNOT7	CCR4-NOT transcription complex, subunit 7	Hs.170553	27330	BX106522
HSI011C04	MAST4	Microtubule associated serine/threonine kinase family member 4	Hs.133539	29120	CR741742
HSI011C05	KIAA1107	KIAA1107	Hs.21554	28414	BX108841
HSI011C06	EST	Transcribed locus		29662
HSI011C07	CNTN2	Contactin 2 (axonal)	Hs.519220	28510	BX111168
HSI011C08	PPP1R10	Protein phosphatase 1, regulatory subunit 10	Hs.106019	29456	BX119129
HSI011C09	NUDT4	Nudix (nucleoside diphosphate linked moiety X)-type motif 4 pseudogene 2	Hs.506325	27985	BX118595
HSI011C10	LASP1	LIM and SH3 protein 1	Hs.334851	27889	BX115458
HSI011C11	C16orf53	Chromosome 16 open reading frame 53	Hs.551559	27672	R12936
HSI011C12	PTGFRN	Hypothetical protein LOC348262	Hs.418093	28314	BX111956
HSI011D01	SFRS1	Splicing factor, arginine/serine-rich 1 (splicing factor 2, alternate splicing factor)	Hs.68714	1692987	AI092478
HSI011D02	C3orf62	Chromosome 3 open reading frame 62	Hs.403828	1688341	BX103163
HSI011D03	EST	Transcribed locus	Hs.587239	27443	CR743520
HSI011D04	KRAS	V-Ki-ras2 Kirsten rat sarcoma viral oncogene homolog	Hs.505033	28627	BX099855
HSI011D05	PEPD	Peptidase D	Hs.36473	30292	CR742448
HSI011D06	ARPC1A	Actin related protein 2/3 complex, subunit 1A, 41kDa	Hs.124126	29469	BX089357
HSI011D07	DPY19L1	Dpy-19-like 1 (C. elegans)	Hs.408623	30286	BX105820
HSI011D08	CAPZA2	Capping protein (actin filament) muscle Z-line, alpha 2	Hs.446123	27992	BX113396
HSI011D09	GPRC5B	G protein-coupled receptor, family C, group 5, member B	Hs.148685	30018	BX094988
HSI011D10	MAP3K5	Mitogen-activated protein kinase kinase kinase 5	Hs.186486	28450	BX099024
HSI011D11	IPO7	Importin 7	Hs.523470	29699	BX094314
HSI011D12	CYHR1	Cysteine/histidine-rich 1	Hs.459379	28289	BX092886
HSI011E01	EST	Transcribed locus	Hs.587442	1695088	BX102087
HSI011E02	ZC3H8	Zinc finger CCCH-type containing 8	Hs.418416	1689952	BX119500
HSI011E03	PIK4CA	Phosphatidylinositol 4-kinase, catalytic, alpha polypeptide	Hs.529438	28309	BX110041
HSI011E04	EEFSEC	Eukaryotic elongation factor, selenocysteine-tRNA-specific	Hs.477498	26729	BX108397
HSI011E05	TMEM48	Transmembrane protein 48	Hs.476525	27569	BX106712
HSI011E06	GEM	GTP binding protein overexpressed in skeletal muscle	Hs.345139	27899	BX089578
HSI011E07	ELOVL5	ELOVL family member 5, elongation of long chain fatty acids (FEN1/Elo2, SUR4/Elo3-like, yeast)	Hs.520189	28425	BX103707
HSI011E08	TRPM2	Transient receptor potential cation channel, subfamily M, member 2	Hs.369759	29708	R42301
HSI011E09	TCN2	Pescadillo homolog 1, containing BRCT domain (zebrafish)	Hs.417948	30228	BX089985
HSI011E10	NONO	Non-POU domain containing, octamer-binding	Hs.533282	29149	BX097828
HSI011E11	DTNB	Dystrobrevin, beta	Hs.307720	29483	BX105922
HSI011E12	UQCRB	Ubiquinol-cytochrome c reductase binding protein	Hs.131255	1688335	BX103536
HSI011F01	ST8SIA1	ST8 alpha-N-acetyl-neuraminide alpha-2,8-sialyltransferase 1	Hs.408614	1689627	BX092630
HSI011F02	DDX59	DEAD (Asp-Glu-Ala-Asp) box polypeptide 59	Hs.497332	29911	BX114322
HSI011F03	LRRC8B	Leucine rich repeat containing 8 family, member B	Hs.584874	29486	R41498
HSI011F04	SPPL3	Signal peptide peptidase 3	Hs.507087	28074	BX119417
HSI011F05	LOC81691	Exonuclease NEF-sp	Hs.177926	28543	BX115403
HSI011F06	MAPK4	Mitogen-activated protein kinase 4	Hs.433728	27052	BX116475
HSI011F07	RAI17	Retinoic acid induced 17	Hs.193118	29022	BX100128
HSI011F08	FYN	FYN oncogene related to SRC, FGR, YES	Hs.390567	28442	CR744826
HSI011F09	FZD1	Frizzled homolog 1 (Drosophila)	Hs.94234	27364	BX090328
HSI011F10	EST	Transcribed locus	Hs.589943	27471	CR745521
HSI011F11	CASC3	Cancer susceptibility candidate 3	Hs.350229	28111	BX092171
HSI011F12	GARNL3	GTPase activating Rap/RanGAP domain-like 3	Hs.29304	26740	BX096154
HSI011G01	EST	Transcribed locus	Hs.208447	1694525	BX100312
HSI011G02	XAB2	XPA binding protein 2	Hs.9822	28448	R40674
HSI011G03	ADRM1	Adhesion regulating molecule 1	Hs.90107	28126	BX116625
HSI011G04	MYST2	MYST histone acetyltransferase 2	Hs.21907	29161	BX098277
HSI011G05	PLCE1	Phospholipase C, epsilon 1	Hs.549158	27908	BX114090
HSI011G06	C1QDC1	C1q domain containing 1	Hs.234355	28337	BX092076
HSI011G07	ADCY3	Adenylate cyclase 3	Hs.467898	29697	BX096022
HSI011G08	SERTAD2	Aldolase A, fructose-bisphosphate	Hs.77293	28555	BX119779
HSI011G09	CAMK1G	Calcium/calmodulin-dependent protein kinase IG	Hs.199068	29500	BX115783
HSI011G10	PTPRN2	Protein tyrosine phosphatase, receptor type, N polypeptide 2	Hs.490789	29720	BX104775
HSI011G11	EST	Transcribed locus	Hs.586525	28343	BX101803
HSI011G12	FBXO3	F-box protein 3	Hs.406787	29944	BX102331
HSI011H01	BDH1	3-hydroxybutyrate dehydrogenase, type 1	Hs.274539	1703756	BX108175
HSI011H02	MLR1	Transcription factor MLR1	Hs.446201	1703720	BX107807
HSI011H03	EST	Transcribed locus	Hs.259168	1704466	BX103700
HSI011H04	K6IRS3	Keratin 6 irs3	Hs.55410	1707177	BX106959
HSI011H05	SPRED1	Sprouty-related, EVH1 domain containing 1	Hs.525781	1688720	BX115921
HSI011H06	FLJ20160	FLJ20160 protein	Hs.418581	1689996	BX113799
HSI011H07	EST	Transcribed locus	Hs.572992	1689994	BX118453
HSI011H08	MLLT6	Myeloid/lymphoid or mixed-lineage leukemia (trithorax homolog, Drosophila); translocated to, 6	Hs.91531	31982	BX091676
HSI011H09	DOCK10	Dedicator of cytokinesis 10	Hs.46578	31145	BX100241
HSI011H10	GTF3C4	General transcription factor IIIC, polypeptide 4, 90kDa	Hs.22302	31759	BX108110
HSI011H11	WDR21A	WD repeat domain 21A	Hs.331491	30700	BX117358
HSI011H12	CDC14B	CDC14 cell division cycle 14 homolog B (S. cerevisiae)	Hs.40582	31876	BX103672
HSI012A01	SP2	Sp2 transcription factor	Hs.514276	29960	BX111040
HSI012A02	ABCF1	ATP-binding cassette, sub-family F (GCN20), member 1	Hs.9573	30400	BX119033
HSI012A03	LRRN3	Leucine rich repeat neuronal 3	Hs.3781	30055	BX118469
HSI012A04	CLSTN2	Calsyntenin 2	Hs.158529	30930	BX116606
HSI012A05	TDG	Thymine-DNA glycosylase	Hs.584809	30075	BX114313
HSI012A06	UCHL1	Ubiquitin carboxyl-terminal esterase L1 (ubiquitin thiolesterase)	Hs.518731	32319	BX092068
HSI012A07	FLJ14154	Hypothetical protein FLJ14154	Hs.513296	31228	BX102893
HSI012A08	GANAB	Glucosidase, alpha; neutral AB	Hs.76847	31456	BX117417
HSI012A09	LGI2	Leucine-rich repeat LGI family, member 2	Hs.12488	31564	BX101797
HSI012A10	CDH10	Cadherin 10, type 2 (T2-cadherin)	Hs.92489	32431	BX116257
HSI012A11	CLSTN1	Calsyntenin 1	Hs.29665	32097	BX093934
HSI012A12	TM4SF18	Transmembrane 4 L six family member 18	Hs.22026	31675	BX103454
HSI012B01	EST	Transcribed locus	Hs.426162	29646	BX110713
HSI012B02	ZNF222	Zinc finger protein 222	Hs.279840	20113	R42451
HSI012B03	RP5-1077B9.4	Invasion inhibitory protein 45	Hs.8595	29961	BX112932
HSI012B04	RPRM	Reprimo, TP53 dependent G2 arrest mediator candidate	Hs.100890	31150	BX100013
HSI012B05	C14orf93	Chromosome 14 open reading frame 93	Hs.255874	30076	BX095943
HSI012B06	CCT4	Chaperonin containing TCP1, subunit 4 (delta)	Hs.421509	31573	BX108704
HSI012B07	GPM6A	Glycoprotein M6A	Hs.75819	31471	BX110553
HSI012B08	PUM2	Pumilio homolog 2 (Drosophila)	Hs.467824	31883	BX094307
HSI012B09	LOC89944	Hypothetical protein BC008326	Hs.436178	31891	BX093603
HSI012B10	KIAA0319	KIAA0319	Hs.26441	31478	BX101658
HSI012B11	FLJ12688	Hypothetical protein FLJ12688	Hs.13526	30613	BX105916
HSI012B12	DKFZP564I1171	Exocyst complex component 3	Hs.586205	30529	BX091172
HSI012C01	C14orf112	Chromosome 14 open reading frame 112	Hs.137108	30431	BX107991
HSI012C02	SCOC	Short coiled-coil protein	Hs.480815	29370	BX109351
HSI012C03	YTHDC2	YTH domain containing 2	Hs.231942	1683334	BX095474
HSI012C04	NID2	Nidogen 2 (osteonidogen)	Hs.369840	1680226	BX089569
HSI012C05	KIAA0363	KIAA0363 protein	Hs.96633	31971	BX110160
HSI012C06	PAK7	P21(CDKN1A)-activated kinase 7	Hs.32539	32334	BX100982
HSI012C07	TMEM97	Transmembrane protein 97	Hs.199695	30538	BX118922
HSI012C08	GRB10	Growth factor receptor-bound protein 10	Hs.164060	31593	BX104659
HSI012C09	DBC1	Deleted in bladder cancer 1	Hs.532316	32342	BX096489
HSI012C10	ZNF651	Zinc finger protein 651	Hs.409561	32130	BX104889
HSI012C11	PTPLAD1	Protein tyrosine phosphatase-like A domain containing 1	Hs.512973	31703	BX112538
HSI012C12	MYST3	MYST histone acetyltransferase (monocytic leukemia) 3	Hs.491577	31887	R43233
HSI012D01	TIAM1	T-cell lymphoma invasion and metastasis 1	Hs.517228	30105	BX098193
HSI012D02	YLPM1	YLP motif containing 1	Hs.531111	30851	BX102033
HSI012D03	NLE1	Notchless homolog 1 (Drosophila)	Hs.85570	30853	BX118029
HSI012D04	TRIM41	Tripartite motif-containing 41	Hs.441488	31074	BX105701
HSI012D05	TRIM66	Tripartite motif-containing 66	Hs.130836	30221	BX113539
HSI012D06	TNFAIP1	Tumor necrosis factor, alpha-induced protein 1 (endothelial)	Hs.76090	29782	BX095175
HSI012D07	SNX15	Sorting nexin 15	Hs.80132	31067	BX095039
HSI012D08	MRPS16	Mitochondrial ribosomal protein S16	Hs.180312	32134	BX109677
HSI012D09	GOSR2	Golgi SNAP receptor complex member 2	Hs.463278	30641	BX103019
HSI012D10	C14orf150	Chromosome 14 open reading frame 150	Hs.497301	32350	BX094747
HSI012D11	SRP9	Signal recognition particle 9kDa	Hs.511425	32257	BX103613
HSI012D12	MEF2D	MADS box transcription enhancer factor 2, polypeptide D (myocyte enhancer factor 2D)	Hs.314327	32353	BX097064
HSI012E01	DKFZp761I2123	Hypothetical protein DKFZp761I2123	Hs.77978	30646	R42070
HSI012E02	DNAJB6	DnaJ (Hsp40) homolog, subfamily B, member 6	Hs.490745	32474	BX097032
HSI012E03	FLRT1	Fibronectin leucine rich transmembrane protein 1	Hs.584876	30963	BX090702
HSI012E04	ZNF646	Zinc finger protein 646	Hs.119273	32142	BX112785
HSI012E05	EGLN1	Egl nine homolog 1 (C. elegans)	Hs.444450	32144	BX107159
HSI012E06	DRG2	Developmentally regulated GTP binding protein 2	Hs.78582	30226	BX117647
HSI012E07	ARHGAP29	Rho GTPase activating protein 29	Hs.483238	30337	BX110004
HSI012E08	B4GALT5	UDP-Gal:betaGlcNAc beta 1,4- galactosyltransferase, polypeptide 5	Hs.370487	29392	BX115404
HSI012E09	LSM16	LSM16 homolog (EDC3, S. cerevisiae)	Hs.96852	30872	BX106083
HSI012E10	NS4ATP2	Hypothetical protein LOC56757	Hs.483906	32481	BX104319
HSI012E11	CIRH1A	Cirrhosis, autosomal recessive 1A (cirhin)	Hs.461113	32149	BX114482
HSI012E12	PTDSS1	Phosphatidylserine synthase 1	Hs.292579	31906	BX089358
HSI012F01	PCSK1	Proprotein convertase subtilisin/kexin type 1	Hs.78977	31072	BX097162
HSI012F02	SMAP1	Stromal membrane-associated protein 1	Hs.485717	30459	R18206
HSI012F03	VWF	Von Willebrand factor	Hs.440848	32459	BX107276
HSI012F04	KIAA0195	KIAA0195	Hs.514474	32490	BX115273
HSI012F05	CDKL3	Cyclin-dependent kinase-like 3	Hs.105818	31384	BX104333
HSI012F06	EST	Transcribed locus	Hs.560417	1687064	BX093875
HSI012F07	DNAJA2	DnaJ (Hsp40) homolog, subfamily A, member 2	Hs.368078	30665	BX096870
HSI012F08	ST18	Suppression of tumorigenicity 18 (breast carcinoma) (zinc finger protein)	Hs.147170	1685965	BX104668
HSI012F09	RAVER1	RAVER1	Hs.337228	30351	BX108742
HSI012F10	GSPT1	G1 to S phase transition 1	Hs.528780	30773	BX112512
HSI012F11	LOC51057	Hypothetical protein LOC51057	Hs.414952	30671	BX098748
HSI012F12	PCDH21	Protocadherin 21	Hs.137556	29178	BX113760
HSI012G01	AYTL2	Acyltransferase like 2	Hs.368853	31099	CR738180
HSI012G02	FARP1	FERM, RhoGEF (ARHGEF) and pleckstrin domain protein 1 (chondrocyte-derived)	Hs.403917	30019	BX111709
HSI012G03	FGF12	Fibroblast growth factor 12	Hs.584758	31262	R42865
HSI012G04	C1orf108	Chromosome 1 open reading frame 108	Hs.293563	29982	CR744256
HSI012G05	GCK	Glucokinase (hexokinase 4, maturity onset diabetes of the young 2)	Hs.1270	30981	BX108401
HSI012G06	OSTM1	Osteopetrosis associated transmembrane protein 1	Hs.226780	30038	BX112333
HSI012G07	AQP4	Aquaporin 4	Hs.315369	31210	BX116277
HSI012G08	EST	Transcribed locus	Hs.123307	1687550	BX113802
HSI012G09	NDUFAF1	NADH dehydrogenase (ubiquinone) 1 alpha subcomplex, assembly factor 1	Hs.106529	32376	BX112179
HSI012G10	LIMK1	LIM domain kinase 1	Hs.36566	31097	BX105923
HSI012G11	PEX11B	Peroxisomal biogenesis factor 11B	Hs.504284	30793	BX116445
HSI012G12	SETD2	SET domain containing 2	Hs.517941	30979	R42648
HSI012H01	GLE1L	GLE1 RNA export mediator-like (yeast)	Hs.522418	31740	BX119420
HSI012H02	CDC42BPA	CDC42 binding protein kinase alpha (DMPK-like)	Hs.35433	32385	BX119587
HSI012H03	SUPV3L1	Suppressor of var1, 3-like 1 (S. cerevisiae)	Hs.106469	30041	BX093129
HSI012H04	POR	P450 (cytochrome) oxidoreductase	Hs.354056	30786	BX113182
HSI012H05	KIAA1944	KIAA1944 protein	Hs.569063	30986	BX090967
HSI012H06	PPM1E	Protein phosphatase 1E (PP2C domain containing)	Hs.245044	30152	R18482
HSI012H07	SPTAN1	Spectrin, alpha, non-erythrocytic 1 (alpha-fodrin)	Hs.372331	29624	BX111658
HSI012H08	PPA1	Pyrophosphatase (inorganic) 1	Hs.437403	31100	BX100662
HSI012H09	NARFL	Nuclear prelamin A recognition factor-like	Hs.513247	31744	BX106385
HSI012H10	C11orf9	Chromosome 11 open reading frame 9	Hs.473109	32174	BX115444
HSI012H11	KIAA0692	KIAA0692	Hs.524874	31642	BX114094
HSI012H12	TRIM9	Tripartite motif-containing 9	Hs.368928	31766	CR744093
HSI013A01	OPRL1	Opiate receptor-like 1	Hs.2859	32221	BX093617
HSI013A02	HTR6	5-hydroxytryptamine (serotonin) receptor 6	Hs.22180	31955	BX105822
HSI013A03	RAB11FIP4	RAB11 family interacting protein 4 (class II)	Hs.406788	30995	BX089340
HSI013A04	NAP1L1	Nucleosome assembly protein 1-like 1	Hs.524599	32615	BX102673
HSI013A05	CMTM1	CKLF-like MARVEL transmembrane domain containing 1	Hs.585005	1677146	BX112082
HSI013A06	EST	Transcribed locus		1688705
HSI013A07	PHC3	Polyhomeotic like 3 (Drosophila)	Hs.529592	1682750	BX104075
HSI013A08	ATP6V1E1	ATPase, H+ transporting, lysosomal 31kDa, V1 subunit E1	Hs.517338	32649	BX112322
HSI013A09	CNTNAP5	Contactin associated protein-like 5	Hs.21975	32730	CR736994
HSI013A10	ANKRD17	Ankyrin repeat domain 17	Hs.518804	33346	BX110637
HSI013A11	NMD3	NMD3 homolog (S. cerevisiae)	Hs.492805	34015	BX098732
HSI013A12	STK38	Serine/threonine kinase 38	Hs.409578	34211	BX099694
HSI013B01	FOXG1B	Forkhead box G1A	Hs.525266	33051	R44020
HSI013B02	RYR2	Ryanodine receptor 2 (cardiac)	Hs.109514	34006	BX112650
HSI013B03	SQLE	Squalene epoxidase	Hs.71465	32834	BX114069
HSI013B04	LZTS1	Leucine zipper, putative tumor suppressor 1	Hs.521432	32837	BX090138
HSI013B05	PDLIM3	PDZ and LIM domain 3	Hs.85862	34337	BX111277
HSI013B06	BBOX1	Butyrobetaine (gamma), 2-oxoglutarate dioxygenase (gamma-butyrobetaine hydroxylase) 1	Hs.144845	34218	BX095825
HSI013B07	NFE2L3	Nuclear factor (erythroid-derived 2)-like 3	Hs.404741	32759	BX102894
HSI013B08	NAP1L3	Nucleosome assembly protein 1-like 3	Hs.21365	32954	BX096625
HSI013B09	PPP1CA	Protein phosphatase 1, catalytic subunit, alpha isoform	Hs.183994	31988	BX106006
HSI013B10	DIP	Death-inducing-protein	Hs.475150	33476	BX091433
HSI013B11	ZNF207	Zinc finger protein 207	Hs.500775	32529	BX114314
HSI013B12	MAPKAPK3	Mitogen-activated protein kinase-activated protein kinase 3	Hs.234521	31782	BX115491
HSI013C01	CTBP2	C-terminal binding protein 2	Hs.501345	32743	BX092168
HSI013C02	EST	Transcribed locus	Hs.143713	1682891	BX102370
HSI013C03	RP13-102H20.1	Hypothetical protein FLJ30058	Hs.22905	34319	BX106992
HSI013C04	RNPS1	RNA binding protein S1, serine-rich domain	Hs.355643	34575	BX092643
HSI013C05	COMMD5	COMM domain containing 5	Hs.2076	34554	BX099495
HSI013C06	TM2D3	TM2 domain containing 3	Hs.288912	34348	BX110455
HSI013C07	GNAI1	Guanine nucleotide binding protein (G protein), alpha inhibiting activity polypeptide 1	Hs.134587	33171	BX119570
HSI013C08	IPO8	Importin 8	Hs.505136	34250	BX111705
HSI013C09	AGPS	Alkylglycerone phosphate synthase	Hs.516543	32969	BX105956
HSI013C10	WDR41	WD repeat domain 41	Hs.482573	34585	BX109045
HSI013C11	HDAC4	Histone deacetylase 4	Hs.20516	33193	BX097108
HSI013C12	EI24	Etoposide induced 2.4 mRNA	Hs.343911	32216	BX098101
HSI013D01	CTSH	Cathepsin H	Hs.148641	33176	BX112934
HSI013D02	HBLD2	HESB like domain containing 2	Hs.449291	31895	BX091976
HSI013D03	PDK2	Pyruvate dehydrogenase kinase, isozyme 2	Hs.256667	33686	BX099946
HSI013D04	ENTPD7	Ectonucleoside triphosphate diphosphohydrolase 7	Hs.369424	33611	BX108760
HSI013D05	TAGLN2	Transgelin 2	Hs.517168	33386	BX089906
HSI013D06	DGCR14	DiGeorge syndrome critical region gene 14	Hs.517407	34562	BX093029
HSI013D07	LOC401431	Hypothetical gene LOC401431	Hs.556097	34333	BX091125
HSI013D08	FGF13	Fibroblast growth factor 13	Hs.6540	34133	BX100984
HSI013D09	DDO	D-aspartate oxidase	Hs.195313	32955	BX109035
HSI013D10	FLJ20010	Hypothetical protein FLJ20010	Hs.91816	34134	BX094951
HSI013D11	LRRC4	Leucine rich repeat containing 4	Hs.567566	33723	BX114395
HSI013D12	UBE2Z	Ubiquitin-conjugating enzyme E2Z (putative)	Hs.514297	33717	BX093884
HSI013E01	SHANK2	SH3 and multiple ankyrin repeat domains 2	Hs.268726	31265	BX090905
HSI013E02	EST	Transcribed locus	Hs.587895	1690154	BX110034
HSI013E03	C12orf4	Chromosome 12 open reading frame 4	Hs.302977	33587	BX107101
HSI013E04	NT5DC2	5'-nucleotidase domain containing 2	Hs.84753	32231	BX114671
HSI013E05	PFN2	Profilin 2	Hs.91747	32232	BX102774
HSI013E06	B4GALT6	UDP-Gal:betaGlcNAc beta 1,4- galactosyltransferase, polypeptide 6	Hs.464848	33727	BX107992
HSI013E07	XPOT	Exportin, tRNA (nuclear export receptor for tRNAs)	Hs.85951	32234	BX108548
HSI013E08	MYNN	Myoneurin	Hs.507025	32767	BX092933
HSI013E09	KLHL26	Kelch-like 26 (Drosophila)	Hs.250632	32343	BX094183
HSI013E10	ARHGDIA	Rho GDP dissociation inhibitor (GDI) alpha	Hs.159161	32555	BX100880
HSI013E11	EST	Transcribed locus	Hs.588288	31913	CR740925
HSI013E12	ZNF289	Zinc finger protein 289, ID1 regulated	Hs.436204	34012	BX116994
HSI013F01	SF3B3	Splicing factor 3b, subunit 3, 130kDa	Hs.514435	33105	BX113419
HSI013F02	C20orf82	Chromosome 20 open reading frame 82	Hs.348297	34150	BX119679
HSI013F03	PTPRN	Protein tyrosine phosphatase, receptor type, N	Hs.89655	33941	BX101562
HSI013F04	FZR1	Fizzy/cell division cycle 20 related 1 (Drosophila)	Hs.413133	33518	R44089
HSI013F05	MALT1	Mucosa associated lymphoid tissue lymphoma translocation gene 1	Hs.180566	31929	BX099162
HSI013F06	RNF144	Ring finger protein 144	Hs.22146	33573	BX107459
HSI013F07	ECHS1	Enoyl Coenzyme A hydratase, short chain, 1, mitochondrial	Hs.76394	32898	BX113954
HSI013F08	CDH4	Cadherin 4, type 1, R-cadherin (retinal)	Hs.473231	32777	BX100923
HSI013F09	EST	Transcribed locus	Hs.527484	32996	BX119131
HSI013F10	KIF2	Kinesin heavy chain member 2	Hs.558351	32781	BX116745
HSI013F11	UBTF	Upstream binding transcription factor, RNA polymerase I	Hs.89781	33208	BX110840
HSI013F12	AP3D1	Adaptor-related protein complex 3, delta 1 subunit	Hs.512815	31821	BX110778
HSI013G01	STARD7	START domain containing 7	Hs.469331	31822	BX118716
HSI013G02	ODF2L	Outer dense fiber of sperm tails 2-like	Hs.149360	33614	BX107142
HSI013G03	MRPS35	Mitochondrial ribosomal protein S35	Hs.311072	33187	BX092824
HSI013G04	DEAF1	Deformed epidermal autoregulatory factor 1 (Drosophila)	Hs.243994	34481	BX118030
HSI013G05	DUSP5	Dual specificity phosphatase 5	Hs.2128	33285	BX093471
HSI013G06	TAF6	TAF6 RNA polymerase II, TATA box binding protein (TBP)-associated factor, 80kDa	Hs.489309	33438	BX113283
HSI013G07	EST	Transcribed locus	Hs.380291	32479	BX099856
HSI013G08	IGSF4D	Immunoglobulin superfamily, member 4D	Hs.164578	1677113	BX111128
HSI013G09	KIAA1906	KIAA1906 protein	Hs.524838	31825	BX119552
HSI013G10	YY1AP1	YY1 associated protein 1	Hs.584927	32605	CR742381
HSI013G11	BM88	BM88 antigen	Hs.22140	31724	BX115459
HSI013G12	RABGEF1	RAB guanine nucleotide exchange factor (GEF) 1	Hs.530053	31730	BX101615
HSI013H01	MSH2	MutS homolog 2, colon cancer, nonpolyposis type 1 (E. coli)	Hs.156519	32790	BX119869
HSI013H02	DLG3	Discs, large homolog 3 (neuroendocrine-dlg, Drosophila)	Hs.522680	33327	BX092384
HSI013H03	RNU3IP2	RNA, U3 small nucleolar interacting protein 2	Hs.153768	33593	BX096947
HSI013H04	STMN2	Stathmin-like 2	Hs.521651	33541	BX109914
HSI013H05	MAG	Myelin associated glycoprotein	Hs.515354	32444	BX111435
HSI013H06	ARFRP1	ADP-ribosylation factor related protein 1	Hs.389277	32796	BX096996
HSI013H07	CACNB1	Calcium channel, voltage-dependent, beta 1 subunit	Hs.635	31941	BX089213
HSI013H08	CENTD1	Centaurin, delta 1	Hs.479451	32623	BX104334
HSI013H09	IFT122	Intraflagellar transport 122 homolog (Chlamydomonas)	Hs.477537	33547	BX093054
HSI013H10	ANKRD15	Ankyrin repeat domain 15	Hs.306764	32897	BX112445
HSI013H11	SCRG1	Scrapie responsive protein 1	Hs.7122	34631	BX113397
HSI013H12	DGCR9	DiGeorge syndrome critical region gene 9	Hs.106311	33448	BX098047
HSI014A01	SOX11	SRY (sex determining region Y)-box 11	Hs.432638	34609	BX118552
HSI014A02	EST	Transcribed locus	Hs.112582	1677877	BX113155
HSI014A03	KIAA0494	KIAA0494	Hs.100874	34288	BX092887
HSI014A04	SEC61A1	Sec61 alpha 1 subunit (S. cerevisiae)	Hs.518236	33235	BX099717
HSI014A05	ZNF398	Zinc finger protein 398	Hs.490504	32504	BX097424
HSI014A06	RAB5C	RAB5C, member RAS oncogene family	Hs.567329	33345	BX112335
HSI014A07	SENP2	SUMO1/sentrin/SMT3 specific peptidase 2	Hs.401388	32706	BX108183
HSI014A08	ATP5F1	ATP synthase, H+ transporting, mitochondrial F0 complex, subunit B1	Hs.514870	34310	BX093138
HSI014A09	CACNA2D3	Calcium channel, voltage-dependent, alpha 2/delta 3 subunit	Hs.128594	32708	BX093834
HSI014A10	COL20A1	Collagen, type XX, alpha 1	Hs.271285	34933	BX109265
HSI014A11	C9orf95	Chromosome 9 open reading frame 95	Hs.494186	32604	CR743942
HSI014A12	OGFOD1	2-oxoglutarate and iron-dependent oxygenase domain containing 1	Hs.231883	34187	BX117141
HSI014B01	KIAA0350	KIAA0350 protein	Hs.35490	34084	BX113818
HSI014B02	UFD1L	Ubiquitin fusion degradation 1 like (yeast)	Hs.474213	34937	BX091698
HSI014B03	HIST1H4H	Histone 1, H4h	Hs.421737	1687361	BX117028
HSI014B04	PIGK	Phosphatidylinositol glycan, class K	Hs.293653	33372	BX116279
HSI014B05	LZTR1	Leucine-zipper-like transcription regulator 1	Hs.78788	33244	BX094845
HSI014B06	STX5A	Syntaxin 5A	Hs.524936	31855	BX096023
HSI014B07	PTCHD2	Patched domain containing 2	Hs.202355	33237	BX104445
HSI014B08	PPP4R1	Protein phosphatase 4, regulatory subunit 1	Hs.464595	32819	BX111070
HSI014B09	ZNF365	Zinc finger protein 365	Hs.22653	33139	BX119045
HSI014B10	UGCGL2	UDP-glucose ceramide glucosyltransferase-like 2	Hs.193226	32716	BX089829
HSI014B11	CPLX2	Complexin 2	Hs.193235	33141	BX096647
HSI014B12	EBP	Emopamil binding protein (sterol isomerase)	Hs.522636	33505	BX104839
HSI014C01	TRIB2	Tribbles homolog 2 (Drosophila)	Hs.467751	32292	BX112485
HSI014C02	KCNS2	Potassium voltage-gated channel, delayed-rectifier, subfamily S, member 2	Hs.388045	33144	BX116434
HSI014C03	SGNE1	Chromosome 15 open reading frame 45	Hs.156540	34499	BX092077
HSI014C04	CD151	CD151 antigen (Raph blood group)	Hs.512857	33871	BX100017
HSI014C05	AFF1	DDHD domain containing 2	Hs.480190	34086	BX114799
HSI014C06	TNFRSF7	TAP binding protein-like	Hs.355307	34637	BX116628
HSI014C07	RBM4	RNA binding motif protein 4	Hs.533712	34382	BX109809
HSI014C08	SNTA1	Hypothetical protein FLJ34048	Hs.31121	34505	R44339
HSI014C09	SEZ6	Seizure related 6 homolog (mouse)	Hs.21837	34959	CR736424
HSI014C10	LIG1	Ligase I, DNA, ATP-dependent	Hs.1770	35280	BX114448
HSI014C11	GDAP1L1	Ganglioside-induced differentiation-associated protein 1-like 1	Hs.517059	34855	BX118543
HSI014C12	DNALI1	Dynein, axonemal, light intermediate polypeptide 1	Hs.406050	35498	BX116260
HSI014D01	CSDC2	Cold shock domain containing C2, RNA binding	Hs.310893	35393	BX097403
HSI014D02	ATP9B	ATPase, Class II, type 9B	Hs.465475	34219	BX101766
HSI014D03	PVR	Poliovirus receptor	Hs.171844	35195	BX110265
HSI014D04	ADNP	Activity-dependent neuroprotector	Hs.293736	34967	CR747996
HSI014D05	ATP6V0A1	ATPase, H+ transporting, lysosomal V0 subunit a1	Hs.463074	35609	BX118141
HSI014D06	HSPA1L	Heat shock 70kDa protein 1-like	Hs.558337	35091	BX115051
HSI014D07	PTPN13	Protein tyrosine phosphatase, non-receptor type 13 (APO-1/CD95 (Fas)-associated phosphatase)	Hs.436142	36348	BX113780
HSI014D08	PRDM4	PR domain containing 4	Hs.506655	35815	BX099696
HSI014D09	NXF1	Nuclear RNA export factor 1	Hs.523739	35080	BX097994
HSI014D10	HYAL3	N-acetyltransferase 6	Hs.129910	34439	BX102896
HSI014D11	LOC388524	Similar to Laminin receptor 1	Hs.449909	34759	BX111042
HSI014D12	PIGQ	Phosphatidylinositol glycan, class Q	Hs.18079	35295	BX089809
HSI014E01	LETM1	Leucine zipper-EF-hand containing transmembrane protein 1	Hs.120165	35405	R24989
HSI014E02	ENC1	Ectodermal-neural cortex (with BTB-like domain)	Hs.104925	35298	BX116607
HSI014E03	MPPED1	Metallophosphoesterase domain containing 1	Hs.159538	34874	BX118641
HSI014E04	CCNG1	Cyclin G1	Hs.79101	35516	BX119571
HSI014E05	YARS	Tyrosyl-tRNA synthetase	Hs.213264	33689	BX103673
HSI014E06	APEG1	Aortic preferentially expressed gene 1	Hs.21639	35077	BX115493
HSI014E07	C17orf75	Chromosome 17 open reading frame 75	Hs.462754	35827	BX100001
HSI014E08	GYG2	Glycogenin 2	Hs.567381	35085	BX089551
HSI014E09	ZNF384	Zinc finger protein 384	Hs.103315	35514	BX117633
HSI014E10	SSBP3	Single stranded DNA binding protein 3	Hs.476706	36356	BX099675
HSI014E11	SNAPC2	Small nuclear RNA activating complex, polypeptide 2, 45kDa	Hs.557654	36582	BX103456
HSI014E12	SNTG1	Syntrophin, gamma 1	Hs.584914	35410	BX110286
HSI014F01	HERC3	Hect domain and RLD 3	Hs.35804	35211	BX104834
HSI014F02	GABRB3	Gamma-aminobutyric acid (GABA) A receptor, beta 3	Hs.302352	34880	BX089338
HSI014F03	NUP85	Nucleoporin 85kDa	Hs.362817	35215	BX097109
HSI014F04	SNX27	Sorting nexin family member 27	Hs.192326	35178	BX106878
HSI014F05	ABCC1	ATP-binding cassette, sub-family C (CFTR/MRP), member 1	Hs.391464	35180	BX114397
HSI014F06	RRAGA	Ras-related GTP binding A	Hs.432330	34660	BX091978
HSI014F07	GOPC	Golgi associated PDZ and coiled-coil motif containing	Hs.191539	34863	BX116154
HSI014F08	KIAA1468	KIAA1468	Hs.465323	34583	BX112539
HSI014F09	PNOC	Prepronociceptin	Hs.88218	34783	BX093885
HSI014F10	CHD4	Chromodomain helicase DNA binding protein 4	Hs.162233	34884	BX101730
HSI014F11	DUSP14	Dual specificity phosphatase 14	Hs.91448	35093	BX113039
HSI014F12	JUP	Junction plakoglobin	Hs.514174	35628	BX090907
HSI014G01	PARD6A	Par-6 partitioning defective 6 homolog alpha (C.elegans)	Hs.112933	36707	BX116430
HSI014G02	LOC197336	Similar to RIKEN cDNA 3230401M21 [Mus musculus]	Hs.511903	35736	BX094034
HSI014G03	CAND2	ACA7 small nucleolar RNA	Hs.343664	36589	BX101926
HSI014G04	ULBP2	UL16 binding protein 2	Hs.250618	36367	BX110568
HSI014G05	LNPEP	Leucyl/cystinyl aminopeptidase	Hs.585114	35526	BX114407
HSI014G06	EST	Transcribed locus	Hs.571295	35741	BX104350
HSI014G07	DOCK9	Dedicator of cytokinesis 9	Hs.314413	35731	BX097907
HSI014G08	ENO2	Enolase 2 (gamma, neuronal)	Hs.511915	35850	R45346
HSI014G09	CLIC5	Chloride intracellular channel 5	Hs.485489	34260	BX101659
HSI014G10	COMT	Catechol-O-methyltransferase	Hs.370408	34255	R44202
HSI014G11	PPP4R2	Protein phosphatase 4, regulatory subunit 2	Hs.431092	35324	R45431
HSI014G12	NDST1	N-deacetylase/N-sulfotransferase (heparan glucosaminyl) 1	Hs.222055	35194	BX100583
HSI014H01	SST	Somatostatin	Hs.12409	35864	BX097033
HSI014H02	TXNRD2	Thioredoxin reductase 2	Hs.443430	34689	BX116376
HSI014H03	NR3C2	Nuclear receptor subfamily 3, group C, member 2	Hs.163924	34262	BX108549
HSI014H04	BAIAP3	BAI1-associated protein 3	Hs.458427	35437	BX112411
HSI014H05	SFMBT1	Scm-like with four mbt domains 1	Hs.343679	35330	BX094186
HSI014H06	SDF2	Stromal cell-derived factor 2	Hs.514036	35191	BX111829
HSI014H07	SEC31L1	SEC31-like 1 (S. cerevisiae)	Hs.370024	36397	BX118926
HSI014H08	TUBB4	Tubulin, beta 4	Hs.110837	36590	BX098393
HSI014H09	PDE9A	Phosphodiesterase 9A	Hs.473927	34950	BX091203
HSI014H10	ATG5	ATG5 autophagy related 5 homolog (S. cerevisiae)	Hs.486063	35441	BX099163
HSI014H11	BNIP3L	BCL2/adenovirus E1B 19kDa interacting protein 3-like	Hs.131226	34683	BX107461
HSI014H12	GM2A	GM2 ganglioside activator	Hs.483873	35110	BX089705
HSI015A01	PLEKHG5	Pleckstrin homology domain containing, family G (with RhoGef domain) member 5	Hs.284232	35464	BX116749
HSI015A02	ITGB1BP1	Integrin beta 1 binding protein 1	Hs.467662	34161	BX113450
HSI015A03	PPP2R5B	Protein phosphatase 2, regulatory subunit B (B56), beta isoform	Hs.75199	35661	BX094477
HSI015A04	PDGFRB	Platelet-derived growth factor receptor, beta polypeptide	Hs.509067	35369	BX102743
HSI015A05	KCNF1	Potassium voltage-gated channel, subfamily F, member 1	Hs.23735	35344	BX113354
HSI015A06	SIAHBP1	Fuse-binding protein-interacting repressor	Hs.521924	34810	BX118718
HSI015A07	ZNF236	Zinc finger protein 236	Hs.189826	36601	BX104556
HSI015A08	C8ORFK32	C8orfK32 protein	Hs.126024	36461	BX090706
HSI015A09	SRF	Serum response factor (c-fos serum response element-binding transcription factor)	Hs.520140	36392	BX098614
HSI015A10	STOML2	Stomatin (EPB72)-like 2	Hs.3439	35374	BX115460
HSI015A11	ANXA7	Annexin A7	Hs.386434	35240	BX099950
HSI015A12	ACTN2	Actinin, alpha 2	Hs.498178	35219	CR739453
HSI015B01	JMJD2B	Jumonji domain containing 2B	Hs.371013	34071	BX113660
HSI015B02	ZNF16	Zinc finger protein 16 (KOX 9)	Hs.493225	35845	BX094990
HSI015B03	RAB5A	RAB5A, member RAS oncogene family	Hs.475663	34928	BX091924
HSI015B04	SYT1	Synaptotagmin I	Hs.310545	35141	BX091153
HSI015B05	KIAA0090	KIAA0090	Hs.439200	35453	BX119236
HSI015B06	CMKOR1	Chemokine orphan receptor 1	Hs.471751	35630	BX111686
HSI015B07	EIF2C1	Eukaryotic translation initiation factor 2C, 1	Hs.22867	35570	BX107278
HSI015B08	GADD45G	Growth arrest and DNA-damage-inducible, gamma	Hs.9701	35572	BX092888
HSI015B09	GORASP1	Golgi reassembly stacking protein 1, 65kDa	Hs.250181	34401	BX090837
HSI015B10	SCN1A	Sodium channel, voltage-gated, type I, alpha	Hs.22654	35683	BX116162
HSI015B11	FLJ10374	Hypothetical protein FLJ10374	Hs.21811	35826	BX098750
HSI015B12	HSF2	Heat shock transcription factor 2	Hs.158195	35903	BX107010
HSI015C01	HBEGF	Heparin-binding EGF-like growth factor	Hs.799	35828	BX113822
HSI015C02	SLC22A6	Solute carrier family 22 (organic anion transporter), member 6	Hs.369252	36482	BX103715
HSI015C03	SMYD2	SET and MYND domain containing 2	Hs.66170	35905	BX101476
HSI015C04	C13orf8	Chromosome 13 open reading frame 8	Hs.7542	34947	BX099857
HSI015C05	AKAP10	A kinase (PRKA) anchor protein 10	Hs.462457	34092	BX119553
HSI015C06	GABRA1	Gamma-aminobutyric acid (GABA) A receptor, alpha 1	Hs.175934	35378	BX118577
HSI015C07	PRTFDC1	Phosphoribosyl transferase domain containing 1	Hs.405619	35059	BX104446
HSI015C08	CHPF	Chondroitin polymerizing factor	Hs.516711	34847	BX119783
HSI015C09	EIF4G1	Eukaryotic translation initiation factor 4 gamma, 1	Hs.433750	35382	BX113546
HSI015C10	EEF1A1	WD repeats and SOF1 domain containing	Hs.439552	35064	CR746279
HSI015C11	C1orf124	Chromosome 1 open reading frame 124	Hs.554892	36495	BX106387
HSI015C12	CTNNAL1	Catenin (cadherin-associated protein), alpha-like 1	Hs.58488	36498	BX100018
HSI015D01	CPE	Carboxypeptidase E	Hs.75360	36500	BX115789
HSI015D02	ARID5A	AT rich interactive domain 5A (MRF1-like)	Hs.920	36502	BX093619
HSI015D03	RBM23	RNA binding motif protein 23	Hs.4997	35251	BX097428
HSI015D04	C14orf103	Chromosome 14 open reading frame 103	Hs.168241	37521	BX110639
HSI015D05	D4ST1	Dermatan 4 sulfotransferase 1	Hs.442449	37420	BX090140
HSI015D06	ASCIZ	ATM/ATR-Substrate Chk2-Interacting Zn2+-finger protein	Hs.16349	37271	BX094919
HSI015D07	FLJ21742	Hypothetical protein FLJ21742	Hs.306809	37378	BX105957
HSI015D08	TMBIM1	Transmembrane BAX inhibitor motif containing 1	Hs.98475	38277	BX111706
HSI015D09	MAEA	Macrophage erythroblast attacher	Hs.139896	38719	BX114780
HSI015D10	ERGIC3	ERGIC and golgi 3	Hs.472558	38693	BX106995
HSI015D11	ERO1L	ERO1-like (S. cerevisiae)	Hs.525339	38722	BX119401
HSI015D12	KPNA1	Karyopherin alpha 1 (importin alpha 5)	Hs.570660	38056	BX099697
HSI015E01	CXorf39	Chromosome X open reading frame 39	Hs.496535	38377	BX116609
HSI015E02	TNPO3	Transportin 3	Hs.193613	39017	BX101798
HSI015E03	LRRC61	Leucine rich repeat containing 61	Hs.488679	38606	BX093316
HSI015E04	KIAA0427	KIAA0427	Hs.145230	39249	BX111558
HSI015E05	SEC24B	SEC24 related gene family, member B (S. cerevisiae)	Hs.292472	38607	BX110457
HSI015E06	DDOST	Dolichyl-diphosphooligosaccharide-protein glycosyltransferase	Hs.523145	39140	BX101767
HSI015E07	KCNQ3	Potassium voltage-gated channel, KQT-like subfamily, member 3	Hs.374023	38822	BX110266
HSI015E08	PER1	Period homolog 1 (Drosophila)	Hs.445534	37222	BX103143
HSI015E09	RGS5	Regulator of G-protein signalling 5	Hs.24950	37225	BX089400
HSI015E10	GABRA5	Gamma-aminobutyric acid (GABA) A receptor, alpha 5	Hs.24969	38065	BX092069
HSI015E11	CHD8	Chromodomain helicase DNA binding protein 8	Hs.530698	40244	BX100654
HSI015E12	C1orf123	Chromosome 1 open reading frame 123	Hs.525391	38070	BX117419
HSI015F01	POGZ	Pogo transposable element with ZNF domain	Hs.489873	38926	BX093596
HSI015F02	ARHGEF7	Rho guanine nucleotide exchange factor (GEF) 7	Hs.508738	39245	BX094309
HSI015F03	SLC38A2	Solute carrier family 38, member 2	Hs.221847	39233	CR738735
HSI015F04	RP11-484I6.3	Hypothetical protein BC015148	Hs.398111	38605	BX102489
HSI015F05	LRRC29	Leucine rich repeat containing 29	Hs.461000	39019	BX118643
HSI015F06	CA5B	Carbonic anhydrase VB, mitochondrial	Hs.369095	39544	BX096148
HSI015F07	FA2H	Fatty acid 2-hydroxylase	Hs.461329	39892	BX103675
HSI015F08	NR4A2	Nuclear receptor subfamily 4, group A, member 2	Hs.165258	38452	BX111655
HSI015F09	PCDHB15	Protocadherin beta 15	Hs.130757	37439	BX097908
HSI015F10	UFC1	Ubiquitin-fold modifier conjugating enzyme 1	Hs.301412	37242	BX108705
HSI015F11	GCC1	GRIP and coiled-coil domain containing 1	Hs.521168	38376	BX100004
HSI015F12	SLIT1	Slit homolog 1 (Drosophila)	Hs.500712	38403	BX116431
HSI015G01	BAIAP2	BAI1-associated protein 2	Hs.128316	37443	BX091121
HSI015G02	GJA4	Gap junction protein, alpha 4, 37kDa (connexin 37)	Hs.296310	37231	BX110556
HSI015G03	SEZ6	Seizure related 6 homolog (mouse)	Hs.21837	38459	BX098980
HSI015G04	MGC2752	Hypothetical protein MGC2752	Hs.467409	38175	BX093738
HSI015G05	PDHA1	Pyruvate dehydrogenase (lipoamide) alpha 1	Hs.530331	37450	BX090061
HSI015G06	RP11-311P8.3	Hypothetical protein MGC23937 similar to CG4798	Hs.91612	39132	BX093730
HSI015G07	RTN4	Reticulon 4	Hs.429581	38934	BX101664
HSI015G08	SPRYD3	SPRY domain containing 3	Hs.343334	38937	BX109036
HSI015G09	CSTF2T	Cleavage stimulation factor, 3' pre-RNA, subunit 2, 64kDa, tau variant	Hs.538493	38833	BX102771
HSI015G10	GSN	Gelsolin (amyloidosis, Finnish type)	Hs.522373	38567	BX100823
HSI015G11	AKR1B1	Aldo-keto reductase family 1, member B1 (aldose reductase)	Hs.521212	39672	BX118799
HSI015G12	TNIK	TRAF2 and NCK interacting kinase	Hs.34024	38728	BX096943
HSI015H01	CIAPIN1	Cytokine induced apoptosis inhibitor 1	Hs.4900	39263	BX104891
HSI015H02	ITM2B	Integral membrane protein 2B	Hs.446450	38123	CR740444
HSI015H03	PRDM10	PR domain containing 10	Hs.275086	37455	BX102725
HSI015H04	TRIO	Triple functional domain (PTPRF interacting)	Hs.130031	37241	BX096494
HSI015H05	DEDD	Death effector domain containing	Hs.517342	38130	BX115339
HSI015H06	TRIP10	Thyroid hormone receptor interactor 10	Hs.515094	37491	BX112540
HSI015H07	PRAF1	Polymerase (RNA) I associated factor 1	Hs.446334	39254	R54238
HSI015H08	SYNGR1	Synaptogyrin 1	Hs.216226	39119	BX109679
HSI015H09	SEPTIN5	Septin 5	Hs.283743	39174	BX117472
HSI015H10	CNAP1	Chromosome condensation-related SMC-associated protein 1	Hs.5719	38736	R50913
HSI015H11	HSA9761	Dimethyladenosine transferase	Hs.533222	39258	BX118927
HSI015H12	EST	Transcribed locus	Hs.269783	1691326	BX107805
HSI016A01	GFM2	G elongation factor, mitochondrial 2	Hs.277154	38911	BX111504
HSI016A02	FAM107A	Family with sequence similarity 107, member A	Hs.8022	38954	BX112413
HSI016A03	OSBPL9	Oxysterol binding protein-like 9	Hs.21938	38596	BX113284
HSI016A04	OTOF	Otoferlin	Hs.91608	38517	BX099381
HSI016A05	RPL15	Ribosomal protein L15	Hs.381219	39688	BX091027
HSI016A06	FLJ20582	Hypothetical protein FLJ20582	Hs.5327	38108	BX119136
HSI016A07	OPTN	Optineurin	Hs.332706	38217	BX119681
HSI016A08	OLFM2	Olfactomedin 2	Hs.169743	38433	R35832
HSI016A09	KIAA1161	KIAA1161	Hs.522083	37582	BX105390
HSI016A10	TTN	Titin	Hs.134602	37489	BX113452
HSI016A11	N4BP2	Nedd4 binding protein 2	Hs.396494	38330	BX095177
HSI016A12	ARL2BP	ADP-ribosylation factor-like 2 binding protein	Hs.513631	37264	BX114502
HSI016B01	HTATIP	HIV-1 Tat interacting protein, 60kDa	Hs.528299	38959	BX117488
HSI016B02	PPM1G	Protein phosphatase 1G (formerly 2C), magnesium-dependent, gamma isoform	Hs.17883	39921	BX118034
HSI016B03	LSM14A	LSM14 homolog A (SCD6, S. cerevisiae)	Hs.407368	39586	BX095728
HSI016B04	PEX12	Peroxisomal biogenesis factor 12	Hs.270532	39183	BX105704
HSI016B05	ARG2	Arginase, type II	Hs.584741	39074	BX107160
HSI016B06	GABRE	Gamma-aminobutyric acid (GABA) A receptor, epsilon	Hs.22785	38755	BX091313
HSI016B07	LRP4	Low density lipoprotein receptor-related protein 4	Hs.4930	38228	BX092114
HSI016B08	C3orf18	Chromosome 3 open reading frame 18	Hs.517860	37507	BX111687
HSI016B09	ADCY2	Adenylate cyclase 2 (brain)	Hs.481545	38139	BX100131
HSI016B10	SYNPO	Synaptopodin	Hs.435228	38156	CR748555
HSI016B11	EXOC4	Exocyst complex component 4	Hs.321273	38154	BX113399
HSI016B12	NRN1	Neuritin 1	Hs.103291	38531	BX095842
HSI016C01	PDYN	Prodynorphin	Hs.22584	39839	BX118600
HSI016C02	IGSF21	Immunoglobin superfamily, member 21	Hs.212511	39510	BX098752
HSI016C03	SYT4	Synaptotagmin IV	Hs.8059	38777	BX109915
HSI016C04	ACOX3	Acyl-Coenzyme A oxidase 3, pristanoyl	Hs.479122	39167	BX098048
HSI016C05	SORCS1	Sortilin-related VPS10 domain containing receptor 1	Hs.145675	39180	BX114457
HSI016C06	COL4A3BP	Collagen, type IV, alpha 3 (Goodpasture antigen) binding protein	Hs.270437	38903	BX099026
HSI016C07	SF3B4	Splicing factor 3b, subunit 4, 49kDa	Hs.516160	38675	BX100483
HSI016C08	TRUB2	TruB pseudouridine (psi) synthase homolog 2 (E. coli)	Hs.98541	37599	BX112184
HSI016C09	CREB3	CAMP responsive element binding protein 3	Hs.522110	38454	BX092826
HSI016C10	RICS	Rho GTPase-activating protein	Hs.440379	37603	BX112446
HSI016C11	ASAHL	N-acylsphingosine amidohydrolase (acid ceramidase)-like	Hs.437365	1682030	BX089273
HSI016C12	SIN3B	SIN3 homolog B, transcription regulator (yeast)	Hs.13999	37608	BX115406
HSI016D01	EST	Transcribed locus	Hs.553987	1691654	BX117334
HSI016D02	ZFPM2	Zinc finger protein, multitype 2	Hs.431009	38347	R49439
HSI016D03	BCR	Breakpoint cluster region	Hs.517461	39295	CR739999
HSI016D04	NPTXR	Neuronal pentraxin receptor	Hs.91622	39109	BX090839
HSI016D05	NDUFB10	NADH dehydrogenase (ubiquinone) 1 beta subcomplex, 10, 22kDa	Hs.513266	38351	BX091700
HSI016D06	ZNF224	Zinc finger protein 224	Hs.549077	39606	BX107011
HSI016D07	PSD2	Pleckstrin and Sec7 domain containing 2	Hs.21963	38794	BX092664
HSI016D08	RP5-1104E15.5	Hypothetical protein FLJ20232	Hs.148677	38553	BX100664
HSI016D09	RP5-1119A7.4	Hypothetical protein FLJ23322	Hs.387601	39096	R51454
HSI016D10	PTN	Pleiotrophin (heparin binding growth factor 8, neurite growth-promoting factor 1)	Hs.371249	38784	BX108406
HSI016D11	RHOG	Ras homolog gene family, member G (rho G)	Hs.501728	39541	BX116281
HSI016D12	EST	Transcribed locus	Hs.146859	1680542	BX113076
HSI016E01	GABRA1	Gamma-aminobutyric acid (GABA) A receptor, alpha 1	Hs.175934	37408	BX115791
HSI016E02	RUTBC3	RUN and TBC1 domain containing 3	Hs.474914	37496	BX104778
HSI016E03	EIF2AK3	Eukaryotic translation initiation factor 2-alpha kinase 3	Hs.434326	38559	BX097214
HSI016E04	PTDSS2	Phosphatidylserine synthase 2	Hs.12851	39319	BX090329
HSI016E05	MAST2	Microtubule associated serine/threonine kinase 2	Hs.319481	40173	BX105263
HSI016E06	CRSP2	Cofactor required for Sp1 transcriptional activation, subunit 2, 150kDa	Hs.407604	39320	CR745275
HSI016E07	CRELD1	Cysteine-rich with EGF-like domains 1	Hs.9383	38788	BX113189
HSI016E08	SEC24C	SEC24 related gene family, member C (S. cerevisiae)	Hs.81964	39755	BX090969
HSI016E09	MYLIP	Myosin regulatory light chain interacting protein	Hs.484738	39757	BX099086
HSI016E10	CNTNAP2	Contactin associated protein-like 2	Hs.190621	39204	BX092078
HSI016E11	ARSG	Arylsulfatase G	Hs.437249	38792	BX107360
HSI016E12	VGLL4	Vestigial like 4 (Drosophila)	Hs.373959	39006	BX112549
HSI016F01	RAB28	RAB28, member RAS oncogene family	Hs.306899	39506	BX114801
HSI016F02	SLC9A6	Solute carrier family 9 (sodium/hydrogen exchanger), member 6	Hs.62185	39007	BX119784
HSI016F03	C11orf11	Chromosome 11 open reading frame 11	Hs.241564	39219	BX101177
HSI016F04	COMMD7	COMM domain containing 7	Hs.408427	39165	BX101804
HSI016F05	KIAA1411	KIAA1411	Hs.211700	40932	BX111510
HSI016F06	KIAA0241	KIAA0241	Hs.128056	41149	BX106009
HSI016F07	PRKAG2	Protein kinase, AMP-activated, gamma 2 non-catalytic subunit	Hs.549162	39706	BX103992
HSI016F08	GFPT1	Glutamine-fructose-6-phosphate transaminase 1	Hs.468864	39658	BX091439
HSI016F09	HPCA	Hippocalcin	Hs.288654	39899	BX090141
HSI016F10	PABPC1	Poly(A) binding protein, cytoplasmic 1	Hs.387804	39872	BX114073
HSI016F11	ATIC	5-aminoimidazole-4-carboxamide ribonucleotide formyltransferase/IMP cyclohydrolase	Hs.90280	40424	BX093116
HSI016F12	FLJ21657	Hypothetical protein FLJ21657	Hs.558531	41174	R56106
HSI016G01	NT5DC3	5'-nucleotidase domain containing 3	Hs.48428	41892	BX117869
HSI016G02	NR4A3	Nuclear receptor subfamily 4, group A, member 3	Hs.279522	40831	BX092030
HSI016G03	TCEA2	Transcription elongation factor A (SII), 2	Hs.505004	41477	BX093937
HSI016G04	PFKL	Phosphofructokinase, liver	Hs.255093	41473	BX113357
HSI016G05	IQSEC1	IQ motif and Sec7 domain 1	Hs.475506	42007	BX091077
HSI016G06	ERP29	Endoplasmic reticulum protein 29	Hs.75841	41696	BX099252
HSI016G07	CHRAC1	Chromatin accessibility complex 1	Hs.279704	40740	BX107994
HSI016G08	REV1L	REV1-like (yeast)	Hs.443077	40535	CR748018
HSI016G09	MAP2	Microtubule-associated protein 2	Hs.368281	40318	BX111044
HSI016G10	LPPR2	Lipid phosphate phosphatase-related protein type 2	Hs.6846	40944	BX114782
HSI016G11	TMEM123	Transmembrane protein 123	Hs.503709	39986	BX100656
HSI016G12	ATRN	Attractin	Hs.276252	40539	BX104767
HSI016H01	IMPDH1	IMP (inosine monophosphate) dehydrogenase 1	Hs.558347	39884	BX112652
HSI016H02	AKAP6	A kinase (PRKA) anchor protein 6	Hs.509083	40844	BX116611
HSI016H03	GPR158	G protein-coupled receptor 158	Hs.499108	39442	BX102490
HSI016H04	UBE3A	Ubiquitin protein ligase E3A (human papilloma virus E6-associated protein, Angelman syndrome)	Hs.567354	40417	BX106704
HSI016H05	MN1	Meningioma (disrupted in balanced translocation) 1	Hs.268515	41591	BX092938
HSI016H06	ARL8B	ADP-ribosylation factor-like 8B	Hs.250009	39677	BX103678
HSI016H07	APBA2	Amyloid beta (A4) precursor protein-binding, family A, member 2 (X11-like)	Hs.525718	40946	BX107343
HSI016H08	STXBP5	Syntaxin binding protein 5 (tomosyn)	Hs.93534	41478	BX097038
HSI016H09	SCARB2	Scavenger receptor class B, member 2	Hs.349656	42122	BX111935
HSI016H10	BAP1	BRCA1 associated protein-1 (ubiquitin carboxy-terminal hydrolase)	Hs.106674	40642	BX096626
HSI016H11	RGS8	Regulator of G-protein signalling 8	Hs.20982	40724	BX108838
HSI016H12	EST	Transcribed locus	Hs.284464	1687642	BX113334
HSI017A01	ELAVL4	ELAV (embryonic lethal, abnormal vision, Drosophila)-like 4 (Hu antigen D)	Hs.213050	40618	BX106243
HSI017A02	MGC2803	Hypothetical protein MGC2803	Hs.515155	40843	BX098504
HSI017A03	APLP1	Amyloid beta (A4) precursor-like protein 1	Hs.74565	40624	BX115494
HSI017A04	GDF10	Growth differentiation factor 10	Hs.2171	40106	BX098840
HSI017A05	KIAA2002	KIAA2002 protein	Hs.9587	40429	BX097110
HSI017A06	RFC1	Replication factor C (activator 1) 1, 145kDa	Hs.507475	39682	BX100471
HSI017A07	DAG1	Dystroglycan 1 (dystrophin-associated glycoprotein 1)	Hs.76111	40456	BX098981
HSI017A08	WASF1	WAS protein family, member 1	Hs.75850	41065	BX110836
HSI017A09	CRYL1	Crystallin, lambda 1	Hs.370703	40115	BX092375
HSI017A10	EST	Transcribed locus	Hs.134801	1692026	BX101566
HSI017A11	KPNA4	Karyopherin alpha 4 (importin alpha 3)	Hs.288193	42026	BX112481
HSI017A12	MRPL10	Mitochondrial ribosomal protein L10	Hs.347535	41172	BX090277
HSI017B01	CCNJ	Cyclin J	Hs.281348	41495	BX098105
HSI017B02	TARS	Threonyl-tRNA synthetase	Hs.481860	41922	BX106880
HSI017B03	AKT3	V-akt murine thymoma viral oncogene homolog 3 (protein kinase B, gamma)	Hs.498292	41818	BX091979
HSI017B04	FHOD3	Formin homology 2 domain containing 3	Hs.436636	40833	BX114561
HSI017B05	PIK3R3	Phosphoinositide-3-kinase, regulatory subunit 3 (p55, gamma)	Hs.170510	42263	BX119619
HSI017B06	ST6GALNAC5	ST6 (alpha-N-acetyl-neuraminyl-2,3-beta-galactosyl-1,3)-N-acetylgalactosaminide alpha-2,6-sialyltransferase 5	Hs.303609	42035	BX116155
HSI017B07	IQGAP1	IQ motif containing GTPase activating protein 1	Hs.430551	41500	BX093886
HSI017B08	APBA2BP	Amyloid beta (A4) precursor protein-binding, family A, member 2 binding protein	Hs.516986	39908	R52646
HSI017B09	TIE1	Tyrosine kinase with immunoglobulin-like and EGF-like domains 1	Hs.78824	41094	BX114920
HSI017B10	CYCS	Cytochrome c, somatic	Hs.437060	40017	BX113420
HSI017B11	NFIA	Nuclear factor I/A	Hs.191911	40175	BX100585
HSI017B12	C3orf37	Chromosome 3 open reading frame 37	Hs.458320	40233	BX115340
HSI017C01	ARPC4	Actin related protein 2/3 complex, subunit 4, 20kDa	Hs.323342	41407	BX118645
HSI017C02	UBOX5	U-box domain containing 5	Hs.129448	40342	BX100882
HSI017C03	SCN2B	Sodium channel, voltage-gated, type II, beta	Hs.129783	40891	BX105393
HSI017C04	PKIA	Protein kinase (cAMP-dependent, catalytic) inhibitor alpha	Hs.433700	40343	BX109356
HSI017C05	SEMA4C	Sema domain, immunoglobulin domain (Ig), transmembrane domain (TM) and short cytoplasmic domain, (semaphorin) 4C	Hs.516220	39995	BX091029
HSI017C06	SLC25A5	Solute carrier family 25 (mitochondrial carrier; adenine nucleotide translocator), member 5	Hs.522767	40959	BX113041
HSI017C07	RASD2	RASD family, member 2	Hs.474711	40864	BX090908
HSI017C08	ARHGEF1	Rho guanine nucleotide exchange factor (GEF) 1	Hs.278186	40647	BX089279
HSI017C09	ALG12	Asparagine-linked glycosylation 12 homolog (yeast, alpha-1,6-mannosyltransferase)	Hs.526711	42047	BX116379
HSI017C10	TJP1	Tight junction protein 1 (zona occludens 1)	Hs.510833	41141	BX094642
HSI017C11	NIP30	NEFA-interacting nuclear protein NIP30	Hs.396740	42158	BX102337
HSI017C12	SOSTDC1	Sclerostin domain containing 1	Hs.25956	41757	BX117265
HSI017D01	EST	Transcribed locus	Hs.133851	1687045	BX095733
HSI017D02	SGEF	Src homology 3 domain-containing guanine nucleotide exchange factor	Hs.240845	41305	BX093031
HSI017D03	MORF4L2	Mortality factor 4 like 2	Hs.326387	41761	BX101618
HSI017D04	KIAA0323	KIAA0323	Hs.558466	41525	CR748648
HSI017D05	ATRX	Alpha thalassemia/mental retardation syndrome X-linked (RAD54 homolog, S. cerevisiae)	Hs.533526	39819	BX093476
HSI017D06	NAV3	Neuron navigator 3	Hs.306322	42282	BX091034
HSI017D07	NFE2L2	Nuclear factor (erythroid-derived 2)-like 2	Hs.155396	41750	BX107464
HSI017D08	EFCBP2	EF-hand calcium binding protein 2	Hs.140950	40900	R56589
HSI017D09	SRCAP	Snf2-related CBP activator protein	Hs.584857	40884	BX092988
HSI017D10	NLN	Neurolysin (metallopeptidase M3 family)	Hs.247460	40658	BX119682
HSI017D11	SEPTIN11	Septin 11	Hs.128199	41144	BX115651
HSI017D12	C1orf198	Chromosome 1 open reading frame 198	Hs.520494	41979	BX116753
HSI017E01	BMP1	Bone morphogenetic protein 1	Hs.1274	41208	BX113453
HSI017E02	ATP5L	ATP synthase, H+ transporting, mitochondrial F0 complex, subunit G	Hs.486360	40148	BX118601
HSI017E03	THNSL1	Threonine synthase-like 1 (bacterial)	Hs.534486	40150	BX116415
HSI017E04	MYT1L	Myelin transcription factor 1-like	Hs.434418	41004	BX095619
HSI017E05	MFSD4	Major facilitator superfamily domain containing 4	Hs.567714	39725	BX104245
HSI017E06	EST	Transcribed locus	Hs.449191	40880	BX106086
HSI017E07	RWDD2	RWD domain containing 2	Hs.423336	42176	BX093056
HSI017E08	GRIP2	Glutamate receptor interacting protein 2	Hs.517819	42299	BX109617
HSI017E09	KIAA0644	KIAA0644 gene product	Hs.21572	41539	BX094991
HSI017E10	KIAA0841	KIAA0841	Hs.7426	41238	BX102827
HSI017E11	ALG1	Asparagine-linked glycosylation 1 homolog (yeast, beta-1,4-mannosyltransferase)	Hs.406461	41542	BX089216
HSI017E12	MLL4	Myeloid/lymphoid or mixed-lineage leukemia 4	Hs.92236	40564	BX092828
HSI017F01	C20orf100	Chromosome 20 open reading frame 100	Hs.26608	41332	BX098850
HSI017F02	LRRN1	Leucine rich repeat neuronal 1	Hs.163244	40606	BX116447
HSI017F03	SPOCK2	Sparc/osteonectin, cwcv and kazal-like domains proteoglycan (testican) 2	Hs.523009	40384	BX112339
HSI017F04	CSGlcA-T	Chondroitin sulfate glucuronyltransferase	Hs.86392	39955	BX116283
HSI017F05	ADCY8	Adenylate cyclase 8 (brain)	Hs.414631	41972	BX108189
HSI017F06	C1orf77	Chromosome 1 open reading frame 77	Hs.371788	41331	BX096877
HSI017F07	GNAZ	Guanine nucleotide binding protein (G protein), alpha z polypeptide	Hs.584760	40773	BX100782
HSI017F08	DDR2	Discoidin domain receptor family, member 2	Hs.275757	42188	BX093835
HSI017F09	MYOZ3	Myozenin 3	Hs.91626	41550	BX117908
HSI017F10	PIK3R4	Phosphoinositide-3-kinase, regulatory subunit 4, p150	Hs.149032	1677437	BX112255
HSI017F11	LFNG	Lunatic fringe homolog (Drosophila)	Hs.159142	40887	BX100485
HSI017F12	TMEM11	Transmembrane protein 11	Hs.567379	42088	BX097431
HSI017G01	NCOA4	Nuclear receptor coactivator 4	Hs.522932	41773	BX092668
HSI017G02	GPC1	Glypican 1	Hs.328232	40921	BX114689
HSI017G03	HSPA9B	Heat shock 70kDa protein 9B (mortalin-2)	Hs.184233	39863	BX117148
HSI017G04	MYCN	V-myc myelocytomatosis viral related oncogene, neuroblastoma derived (avian)	Hs.25960	41565	BX098049
HSI017G05	WDR42A	WD repeat domain 42A	Hs.492236	40181	CR744894
HSI017G06	UBR2	Ubiquitin protein ligase E3 component n-recognin 2	Hs.529925	40394	BX096655
HSI017G07	WBSCR1	Williams-Beuren syndrome chromosome region 1	Hs.520943	41462	BX108846
HSI017G08	HCRTR1	Hypocretin (orexin) receptor 1	Hs.388226	40608	BX119589
HSI017G09	FCHSD2	FCH and double SH3 domains 2	Hs.445748	41765	BX115440
HSI017G10	RLF	Rearranged L-myc fusion	Hs.205627	41345	BX105264
HSI017G11	NAPB	N-ethylmaleimide-sensitive factor attachment protein, beta	Hs.269471	40695	BX113192
HSI017G12	RAN	RAN, member RAS oncogene family	Hs.10842	42093	BX102190
HSI017H01	C20orf3	Chromosome 20 open reading frame 3	Hs.472330	40818	BX107361
HSI017H02	OPCML	Opioid binding protein/cell adhesion molecule-like	Hs.4817	41777	R66461
HSI017H03	STIM1	Stromal interaction molecule 1	Hs.501735	41993	CR748935
HSI017H04	COG7	Component of oligomeric golgi complex 7	Hs.185807	41249	BX100665
HSI017H05	PHACTR3	Phosphatase and actin regulator 3	Hs.473218	42099	CR745626
HSI017H06	LOC93622	Hypothetical protein BC006130	Hs.6815	42300	BX098004
HSI017H07	C14orf121	Chromosome 14 open reading frame 121	Hs.26135	41010	BX116630
HSI017H08	VIL2	Villin 2 (ezrin)	Hs.487027	40907	BX090576
HSI017H09	PSMC5	Proteasome (prosome, macropain) 26S subunit, ATPase, 5	Hs.79387	42744	BX113782
HSI017H10	KIAA0652	FERM domain containing 4A	Hs.410092	42426	BX096508
HSI017H11	GRIN3A	Glutamate receptor, ionotropic, N-methyl-D-aspartate 3A	Hs.567657	42747	BX099698
HSI017H12	KLHDC7B	Kelch domain containing 7B	Hs.137007	1683587	BX089801
HSI018A01	GOT1	Glutamic-oxaloacetic transaminase 1, soluble (aspartate aminotransferase 1)	Hs.500756	41939	BX097405
HSI018A02	TSPAN7	Tetraspanin 7	Hs.441664	41691	BX101457
HSI018A03	ANKRD32	Ankyrin repeat domain 32	Hs.482853	43074	R61259
HSI018A04	ADNP	Activity-dependent neuroprotector	Hs.293736	42851	BX090278
HSI018A05	FNTA	Farnesyltransferase, CAAX box, alpha	Hs.370312	37853	BX105205
HSI018A06	OCIAD1	OCIA domain containing 1	Hs.518750	37947	BX099948
HSI018A07	SLC19A2	Solute carrier family 19 (thiamine transporter), member 2	Hs.30246	130060	BX097042
HSI018A08	CLIPR-59	CLIP-170-related protein	Hs.466539	43071	BX091981
HSI018A09	SOAT1	Sterol O-acyltransferase (acyl-Coenzyme A: cholesterol acyltransferase) 1	Hs.496383	130109	BX097099
HSI018A10	STXBP3	Syntaxin binding protein 3	Hs.530436	42858	BX105547
HSI018A11	SRI	Sorcin	Hs.489040	130095	BX097996
HSI018A12	TOMM70A	Translocase of outer mitochondrial membrane 70 homolog A (yeast)	Hs.227253	37861	BX091441
HSI018B01	TXLNA	Taxilin alpha	Hs.17987	42594	BX118146
HSI018B02	PSCD2	Pleckstrin homology, Sec7 and coiled-coil domains 2 (cytohesin-2)	Hs.8517	130552	R22505
HSI018B03	EHD3	EH-domain containing 3	Hs.368808	130892	BX098975
HSI018B04	MSI2	Musashi homolog 2 (Drosophila)	Hs.134470	42213	BX096013
HSI018B05	RGN	Regucalcin (senescence marker protein-30)	Hs.77854	42758	BX092070
HSI018B06	SYK	Spleen tyrosine kinase	Hs.371720	42214	BX104434
HSI018B07	NDRG4	NDRG family member 4	Hs.322430	41593	BX095303
HSI018B08	PHACTR3	Phosphatase and actin regulator 3	Hs.473218	41807	BX112417
HSI018B09	KIAA0574	KIAA0574 protein	Hs.383564	42326	BX103460
HSI018B10	TRAF2	TNF receptor-associated factor 2	Hs.522506	42716	BX111707
HSI018B11	RPL28	Ribosomal protein L28	Hs.356371	42131	BX089402
HSI018B12	CX3CL1	Chemokine (C-X3-C motif) ligand 1	Hs.531668	42356	BX116385
HSI018C01	GGPS1	Geranylgeranyl diphosphate synthase 1	Hs.55498	42865	BX107103
HSI018C02	NOVA1	Neuro-oncological ventral antigen 1	Hs.31588	37855	BX113143
HSI018C03	BAI2	Brain-specific angiogenesis inhibitor 2	Hs.524138	42870	BX106011
HSI018C04	EP400	E1A binding protein p400	Hs.507307	130114	BX101937
HSI018C05	C16orf34	Chromosome 16 open reading frame 34	Hs.513261	130143	BX102749
HSI018C06	SNX3	Sorting nexin 3	Hs.12102	37753	BX110371
HSI018C07	RAB2	RAB2, member RAS oncogene family	Hs.369017	37649	BX107576
HSI018C08	EST	Transcribed locus	Hs.587267	42560	CR739044
HSI018C09	SNAPC3	Small nuclear RNA activating complex, polypeptide 3, 50kDa	Hs.546299	41694	BX119762
HSI018C10	YWHAE	Tyrosine 3-monooxygenase/tryptophan 5-monooxygenase activation protein, epsilon polypeptide	Hs.513851	43093	R59710
HSI018C11	SLC25A6	Solute carrier family 25 (mitochondrial carrier; adenine nucleotide translocator), member 6	Hs.350927	42352	BX118474
HSI018C12	TKT	Transketolase (Wernicke-Korsakoff syndrome)	Hs.89643	42648	BX117093
HSI018D01	JAGN1	Jagunal homolog 1 (Drosophila)	Hs.24054	42649	BX104352
HSI018D02	CHRM2	Cholinergic receptor, muscarinic 2	Hs.535891	41608	BX090062
HSI018D03	DGKI	Diacylglycerol kinase, iota	Hs.242947	41824	BX095830
HSI018D04	TCF8	Transcription factor 8 (represses interleukin 2 expression)	Hs.124503	42721	BX100730
HSI018D05	FBLN1	Fibulin 1	Hs.24601	130212	BX112601
HSI018D06	SCG3	Secretogranin III	Hs.232618	42321	BX094948
HSI018D07	RRM1	Ribonucleotide reductase M1 polypeptide	Hs.558393	43103	BX102772
HSI018D08	ZNF721	Zinc finger protein 721	Hs.428360	130193	BX113631
HSI018D09	ZNF263	Zinc finger protein 263	Hs.124553	42675	BX119620
HSI018D10	HM13	Histocompatibility (minor) 13	Hs.373741	130195	BX113738
HSI018D11	C4orf8	Chromosome 4 open reading frame 8	Hs.125348	42463	BX112541
HSI018D12	PPP1R13B	Protein phosphatase 1, regulatory (inhibitor) subunit 13B	Hs.584871	42572	BX109153
HSI018E01	B3GALT3	UDP-Gal:betaGlcNAc beta 1,3-galactosyltransferase, polypeptide 3 (Globoside blood group)	Hs.418062	42737	BX118930
HSI018E02	MTCH1	Mitochondrial carrier homolog 1 (C. elegans)	Hs.485262	42048	BX116380
HSI018E03	RCN2	Reticulocalbin 2, EF-hand calcium binding domain	Hs.79088	37917	CR740842
HSI018E04	SPTB	Spectrin, beta, erythrocytic (includes spherocytosis, clinical type I)	Hs.417303	43170	BX106530
HSI018E05	CENPB	Centromere protein B, 80kDa	Hs.516855	37772	BX104835
HSI018E06	GCDH	Glutaryl-Coenzyme A dehydrogenase	Hs.532699	42544	BX090910
HSI018E07	ECEL1	Endothelin converting enzyme-like 1	Hs.26880	37986	BX091205
HSI018E08	STC2	Stanniocalcin 2	Hs.233160	130057	BX090587
HSI018E09	C8orf57	Chromosome 8 open reading frame 57	Hs.492187	42895	BX102726
HSI018E10	INVS	Inversin	Hs.558477	130233	BX117681
HSI018E11	EIF3S2	Eukaryotic translation initiation factor 3, subunit 2 beta, 36kDa	Hs.530096	42897	BX111506
HSI018E12	MGC11102	Hypothetical protein MGC11102	Hs.425178	130239	BX091440
HSI018F01	TMEM40	Transmembrane protein 40	Hs.475502	130243	BX091636
HSI018F02	UBL7	Ubiquitin-like 7 (bone marrow stromal cell-derived)	Hs.334713	42635	BX100587
HSI018F03	VAMP2	Vesicle-associated membrane protein 2 (synaptobrevin 2)	Hs.25348	42798	BX117489
HSI018F04	EXTL3	Exostoses (multiple)-like 3	Hs.491354	42254	BX095042
HSI018F05	C10orf89	Chromosome 10 open reading frame 89	Hs.281004	1683245	BX117705
HSI018F06	PITRM1	Pitrilysin metallopeptidase 1	Hs.528300	42508	BX111178
HSI018F07	DKFZP761N09121	Hypothetical protein DKFZp761N09121	Hs.6421	42803	BX119139
HSI018F08	COQ9	Coenzyme Q9 homolog (yeast)	Hs.513632	41946	BX111834
HSI018F09	UBXD2	UBX domain containing 2	Hs.350806	42804	BX097067
HSI018F10	RAB6A	RAB6A, member RAS oncogene family	Hs.503222	42151	BX116757
HSI018F11	DJ122O8.2	Hypothetical protein dJ122O8.2	Hs.112909	37728	BX112798
HSI018F12	PTPRK	Protein tyrosine phosphatase, receptor type, K	Hs.155919	42062	BX098620
HSI018G01	EST	Transcribed locus		1677459
HSI018G02	SPON1	Spondin 1, extracellular matrix protein	Hs.445818	42480	BX118037
HSI018G03	PELI1	Pellino homolog 1 (Drosophila)	Hs.7886	130633	BX116801
HSI018G04	APOD	Apolipoprotein D	Hs.522555	130279	BX095250
HSI018G05	RAB11A	RAB11A, member RAS oncogene family	Hs.321541	130285	BX099399
HSI018G06	HPCAL1	Hippocalcin-like 1	Hs.467696	42724	BX097532
HSI018G07	RAP1GA1	RAP1, GTPase activating protein 1	Hs.148178	42808	BX094488
HSI018G08	SPP1	Secreted phosphoprotein 1 (osteopontin, bone sialoprotein I, early T-lymphocyte activation 1)	Hs.313	37796	BX102828
HSI018G09	UBC	Ubiquitin C	Hs.520348	37797	BX102341
HSI018G10	KIAA0984	KIAA0984 protein	Hs.192492	37646	BX118722
HSI018G11	SEC15L2	SEC15-like 2 (S. cerevisiae)	Hs.303454	41958	BX119555
HSI018G12	C9orf74	Chromosome 9 open reading frame 74	Hs.495229	41732	BX115462
HSI018H01	LARS2	Leucyl-tRNA synthetase 2, mitochondrial	Hs.526975	42814	BX111688
HSI018H02	LOC152217	Hypothetical protein BC007882	Hs.118820	42180	BX104969
HSI018H03	PAFAH1B1	Platelet-activating factor acetylhydrolase, isoform Ib, alpha subunit 45kDa	Hs.77318	41859	BX099027
HSI018H04	TM2D2	TM2 domain containing 2	Hs.7471	42822	BX115278
HSI018H05	DDX3X	DEAD (Asp-Glu-Ala-Asp) box polypeptide 3, X-linked	Hs.380774	43138	BX099861
HSI018H06	GRB7	Growth factor receptor-bound protein 7	Hs.86859	130323	BX094412
HSI018H07	CELSR2	Cadherin, EGF LAG seven-pass G-type receptor 2 (flamingo homolog, Drosophila)	Hs.57652	42919	BX110290
HSI018H08	CRYM	Crystallin, mu	Hs.924	42373	BX106539
HSI018H09	CORO1B	Coronin, actin binding protein, 1B	Hs.6191	37697	BX092991
HSI018H10	CREB5	CAMP responsive element binding protein 5	Hs.437075	130280	BX107718
HSI018H11	HERC5	Hect domain and RLD 5	Hs.26663	37942	BX109618
HSI018H12	EST	Transcribed locus	Hs.130231	1691633	BX094855
HSI019A01	ACSL6	Acyl-CoA synthetase long-chain family member 6	Hs.14945	42928	BX107280
HSI019A02	TARDBP	TAR DNA binding protein	Hs.300624	41775	BX093836
HSI019A03	ZDHHC17	Zinc finger, DHHC-type containing 17	Hs.4014	41870	BX095622
HSI019A04	NAGPA	N-acetylglucosamine-1-phosphodiester alpha-N-acetylglucosaminidase	Hs.21334	43150	BX091704
HSI019A05	AP1GBP1	AP1 gamma subunit binding protein 1	Hs.101480	41731	BX114458
HSI019A06	REEP5	Receptor accessory protein 5	Hs.429608	42417	BX119428
HSI019A07	CARD12	Caspase recruitment domain family, member 12	Hs.584951	42729	BX093352
HSI019A08	CSTF1	Cleavage stimulation factor, 3' pre-RNA, subunit 1, 50kDa	Hs.172865	43155	BX101483
HSI019A09	DYSF	Dysferlin, limb girdle muscular dystrophy 2B (autosomal recessive)	Hs.252180	130347	BX111346
HSI019A10	EPB41L1	Erythrocyte membrane protein band 4.1-like 1	Hs.437422	42385	BX098201
HSI019A11	KIAA1949	KIAA1949	Hs.101150	130381	BX115189
HSI019A12	KIAA1026	Kazrin	Hs.368823	131582	BX115268
HSI019B01	DSCR4	Down syndrome critical region gene 4	Hs.23251	130358	BX112350
HSI019B02	CTSS	Cathepsin S	Hs.181301	130391	R22873
HSI019B03	VGLL3	Vestigial like 3 (Drosophila)	Hs.435013	130297	BX116348
HSI019B04	GPR162	G protein-coupled receptor 162	Hs.418105	41811	BX102192
HSI019B05	COCH	Coagulation factor C homolog, cochlin (Limulus polyphemus)	Hs.21016	42627	BX098283
HSI019B06	PTMA	Prothymosin, alpha (gene sequence 28)	Hs.459927	42295	R60916
HSI019B07	NCBP1	Nuclear cap binding protein subunit 1, 80kDa	Hs.288867	1688478	BX109963
HSI019B08	RTN1	Reticulon 1	Hs.368626	41992	BX111963
HSI019B09	SPATA7	Spermatogenesis associated 7	Hs.525518	43059	BX119786
HSI019B10	C16orf34	Chromosome 16 open reading frame 34	Hs.513261	42528	CR746183
HSI019B11	PTPN11	Protein tyrosine phosphatase, non-receptor type 11 (Noonan syndrome 1)	Hs.506852	42848	BX093627
HSI019B12	HMOX2	Heme oxygenase (decycling) 2	Hs.284279	43168	BX101805
HSI019C01	CRHR1	Corticotropin releasing hormone receptor 1	Hs.417628	42530	BX113548
HSI019C02	ABLIM3	Actin binding LIM protein family, member 3	Hs.49688	43063	BX109810
HSI019C03	SLC37A4	Solute carrier family 37 (glycerol-6-phosphate transporter), member 4	Hs.132760	37719	BX116040
HSI019C04	APBA2BP	Amyloid beta (A4) precursor protein-binding, family A, member 2 binding protein	Hs.516986	42947	BX090970
HSI019C05	DNAJB4	DnaJ (Hsp40) homolog, subfamily B, member 4	Hs.380282	131100	CR745294
HSI019C06	MS4A8B	Membrane-spanning 4-domains, subfamily A, member 8B	Hs.150878	37689	BX117911
HSI019C07	SYNGR2	Synaptogyrin 2	Hs.464210	42740	BX116477
HSI019C08	RAVER2	Hypothetical protein FLJ10770	Hs.207538	38049	BX089588
HSI019C09	ATP6V1A	ATPase, H+ transporting, lysosomal 70kDa, V1 subunit A	Hs.477155	131291	BX096973
HSI019C10	PSMD9	Proteasome (prosome, macropain) 26S subunit, non-ATPase, 9	Hs.131151	37951	BX112327
HSI019C11	ARFIP1	ADP-ribosylation factor interacting protein 1 (arfaptin 1)	Hs.416089	132765	BX094028
HSI019C12	KCNK7	Potassium channel, subfamily K, member 7	Hs.175218	131636	BX094943
HSI019D01	C14orf125	Chromosome 14 open reading frame 125	Hs.370299	134666	BX096991
HSI019D02	MAGEA10	Melanoma antigen family A, 10	Hs.18048	131595	BX097006
HSI019D03	NXPH4	Neurexophilin 4	Hs.534396	134667	BX097025
HSI019D04	SLC25A32	Solute carrier family 25, member 32	Hs.208425	134692	BX097052
HSI019D05	TBC1D1	TBC1 (tre-2/USP6, BUB2, cdc16) domain family, member 1	Hs.176503	131984	BX097065
HSI019D06	AP3S2	Adaptor-related protein complex 3, sigma 2 subunit	Hs.19720	135085	BX098014
HSI019D07	RNF128	Ring finger protein 128	Hs.496542	132015	BX101982
HSI019D08	TPST1	Tyrosylprotein sulfotransferase 1	Hs.421194	134130	BX098054
HSI019D09	PIP5K2C	Phosphatidylinositol-4-phosphate 5-kinase, type II, gamma	Hs.144502	133173	BX098965
HSI019D10	CPD	Carboxypeptidase D	Hs.446079	132638	BX094050
HSI019D11	ZNF644	Zinc finger protein 644	Hs.173001	134300	BX098986
HSI019D12	TFEB	Transcription factor EB	Hs.485360	130575	BX108797
HSI019E01	RP6-213H19.1	Mst3 and SOK1-related kinase	Hs.444247	131281	BX100849
HSI019E02	CCDC34	Coiled-coil domain containing 34	Hs.143733	131287	BX097073
HSI019E03	RNF170	Ring finger protein 170	Hs.491626	130887	BX117641
HSI019E04	OR7E91P	Olfactory receptor, family 7, subfamily E, member 91 pseudogene	Hs.327033	132102	BX099017
HSI019E05	SLC31A1	Solute carrier family 31 (copper transporters), member 1	Hs.532315	133274	BX104964
HSI019E06	DSCR1L2	Down syndrome critical region gene 1-like 2	Hs.468261	132828	BX105019
HSI019E07	BRPF1	Bromodomain and PHD finger containing, 1	Hs.1004	132010	BX105967
HSI019E08	BNC1	Basonuclin 1	Hs.459153	132373	BX106012
HSI019E09	PLAC2	Placenta-specific 2	Hs.515575	134366	BX106036
HSI019E10	GRAMD1C	GRAM domain containing 1C	Hs.24583	135106	BX106093
HSI019E11	VEZT	Vezatin, adherens junctions transmembrane protein	Hs.24135	132781	BX106118
HSI019E12	YPEL3	Yippee-like 3 (Drosophila)	Hs.513491	134728	BX106144
HSI019F01	TNS3	Tensin 3	Hs.520814	132787	BX106179
HSI019F02	CLTA	Clathrin, light polypeptide (Lca)	Hs.522114	132398	BX107238
HSI019F03	PECAM1	Platelet/endothelial cell adhesion molecule (CD31 antigen)	Hs.514412	130541	BX098567
HSI019F04	SLC30A2	Solute carrier family 30 (zinc transporter), member 2	Hs.143545	130926	BX108937
HSI019F05	NTF5	Neurotrophin 5 (neurotrophin 4/5)	Hs.266902	130941	BX099609
HSI019F06	AVPI1	Arginine vasopressin-induced 1	Hs.23918	132852	BX109796
HSI019F07	LOC57228	Small trans-membrane and glycosylated protein	Hs.558523	130698	BX099708
HSI019F08	KIAA0100	KIAA0100	Hs.151761	38018	BX116156
HSI019F09	FRZB	Frizzled-related protein	Hs.128453	131669	BX109993
HSI019F10	PSMA1	Proteasome (prosome, macropain) subunit, alpha type, 1	Hs.102798	134544	BX112637
HSI019F11	COIL	Coilin	Hs.532795	132844	BX112688
HSI019F12	NXT1	NTF2-like export factor 1	Hs.516933	135177	BX113437
HSI019G01	DLX4	Distal-less homeobox 4	Hs.172648	134812	BX113580
HSI019G02	PERP	PERP, TP53 apoptosis effector	Hs.520421	134793	BX113680
HSI019G03	EST	Transcribed locus	Hs.404298	134394	BX114512
HSI019G04	PEX26	Peroxisome biogenesis factor 26	Hs.517400	1692390	BX091746
HSI019G05	NFIB	Nuclear factor I/B	Hs.370359	130995	BX112561
HSI019G06	ZNF692	Zinc finger protein 692	Hs.377705	132901	BX112576
HSI019G07	C9orf27	Chromosome 9 open reading frame 27	Hs.23367	130972	BX116645
HSI019G08	LHFP	Lipoma HMGIC fusion partner	Hs.507798	133323	BX112735
HSI019G09	LOC63929	Hypothetical protein LOC63929	Hs.558649	130600	BX108020
HSI019G10	TMEM4	Transmembrane protein 4	Hs.8752	130610	BX108316
HSI019G11	PDCD8	Programmed cell death 8 (apoptosis-inducing factor)	Hs.424932	131374	BX114670
HSI019G12	C20orf67	Chromosome 20 open reading frame 67	Hs.472856	132528	BX090374
HSI019H01	BAZ2A	Bromodomain adjacent to zinc finger domain, 2A	Hs.314263	134843	BX091690
HSI019H02	ZBTB33	Zinc finger and BTB domain containing 33	Hs.143604	134995	BX092275
HSI019H03	ARMC1	Armadillo repeat containing 1	Hs.269542	132476	BX092338
HSI019H04	SPPL2A	Signal peptide peptidase-like 2A	Hs.401537	133341	BX092463
HSI019H05	FLJ20160	FLJ20160 protein	Hs.418581	131402	BX094218
HSI019H06	BAT2D1	BAT2 domain containing 1	Hs.494614	133371	BX094340
HSI019H07	FAM91A1	Family with sequence similarity 91, member A1	Hs.459174	131049	BX094479
HSI019H08	FLJ90575	Hypothetical protein FLJ90575	Hs.381181	132981	BX091584
HSI019H09	BMP5	Bone morphogenetic protein 5	Hs.296648	131093	BX095543
HSI019H10	ZNF354A	Zinc finger protein 354A	Hs.484324	132144	BX098612
HSI019H11	ALPP	Alkaline phosphatase, placental (Regan isozyme)	Hs.284255	131419	BX095665
HSI019H12	EST	Transcribed locus	Hs.134230	1678485	BX098718
HSI020A01	PAK3	P21 (CDKN1A)-activated kinase 3	Hs.390616	132217	BX098524
HSI020A02	KLF5	Kruppel-like factor 5 (intestinal)	Hs.508234	132711	BX099498
HSI020A03	ECHDC1	Enoyl Coenzyme A hydratase domain containing 1	Hs.486410	131825	BX099655
HSI020A04	WNT6	Wingless-type MMTV integration site family, member 6	Hs.29764	134893	BX100389
HSI020A05	KCNK3	Potassium channel, subfamily K, member 3	Hs.24040	133076	BX100444
HSI020A06	KIAA1018	KIAA1018	Hs.584863	133719	BX100498
HSI020A07	ADAM33	ADAM metallopeptidase domain 33	Hs.173716	131485	BX103461
HSI020A08	RAD51L1	RAD51-like 1 (S. cerevisiae)	Hs.172587	130720	BX104268
HSI020A09	KIAA0971	KIAA0971	Hs.84429	134904	BX106519
HSI020A10	PPP1R15B	Protein phosphatase 1, regulatory (inhibitor) subunit 15B	Hs.304376	133374	BX107773
HSI020A11	HPS4	Hermansky-Pudlak syndrome 4	Hs.474436	134491	BX108547
HSI020A12	WDR36	WD repeat domain 36	Hs.533237	131519	BX110480
HSI020B01	C10orf25	Chromosome 10 open reading frame 25	Hs.568448	131886	BX106824
HSI020B02	PRSS12	Protease, serine, 12 (neurotrypsin, motopsin)	Hs.445857	131556	BX110404
HSI020B03	ZNF500	Zinc finger protein 500	Hs.513316	130733	BX111375
HSI020B04	JMJD2C	Jumonji domain containing 2C	Hs.157106	131865	BX108419
HSI020B05	MLL3	Myeloid/lymphoid or mixed-lineage leukemia 3	Hs.270492	131845	BX112386
HSI020B06	ZNF42	Zinc finger protein 42 (myeloid-specific retinoic acid-responsive)	Hs.399810	135342	BX114371
HSI020B07	ETAA16	ETAA16 protein	Hs.353022	135369	BX115148
HSI020B08	COMMD8	COMM domain containing 8	Hs.23956	132530	BX089270
HSI020B09	WNT10A	Wingless-type MMTV integration site family, member 10A	Hs.121540	135346	BX115352
HSI020B10	DDX49	DEAD (Asp-Glu-Ala-Asp) box polypeptide 49	Hs.143187	133048	BX115374
HSI020B11	HSPA14	Heat shock 70kDa protein 14	Hs.534169	132619	BX115421
HSI020B12	ONECUT1	One cut domain, family member 1	Hs.511432	1673415	BX110663
HSI020C01	LARS	Leucyl-tRNA synthetase	Hs.432674	135407	BX116374
HSI020C02	RASGRP3	RAS guanyl releasing protein 3 (calcium and DAG-regulated)	Hs.143674	133082	BX114300
HSI020C03	DBN1	Drebrin 1	Hs.130316	130657	BX118403
HSI020C04	PRKRIR	Protein-kinase, interferon-inducible double stranded RNA dependent inhibitor, repressor of (P58 repressor)	Hs.503315	131881	BX089138
HSI020C05	C1orf115	Chromosome 1 open reading frame 115	Hs.519839	131887	BX091982
HSI020C06	LAMC3	Laminin, gamma 3	Hs.201805	131562	BX089329
HSI020C07	CD164	CD164 antigen, sialomucin	Hs.520313	131928	BX102260
HSI020C08	NDUFB7	NADH dehydrogenase (ubiquinone) 1 beta subcomplex, 7, 18kDa	Hs.532853	132618	BX118330
HSI020C09	SLC16A1	AKR7 family pseudogene	Hs.75231	135007	BX091998
HSI020C10	P4HB	Procollagen-proline, 2-oxoglutarate 4-dioxygenase (proline 4-hydroxylase), beta polypeptide	Hs.464336	132702	BX092023
HSI020C11	SLC5A6	Solute carrier family 5 (sodium-dependent vitamin transporter), member 6	Hs.435735	135018	BX092867
HSI020C12	ACSL4	Acyl-CoA synthetase long-chain family member 4	Hs.268785	133073	BX092925
HSI020D01	SEC24D	SEC24 related gene family, member D (S. cerevisiae)	Hs.189641	133098	BX104187
HSI020D02	CLPX	ClpX caseinolytic peptidase X homolog (E. coli)	Hs.113823	132334	BX093924
HSI020D03	BAZ1B	Bromodomain adjacent to zinc finger domain, 1B	Hs.488671	132488	BX093970
HSI020D04	SVEP1	Sushi, von Willebrand factor type A, EGF and pentraxin domain containing 1	Hs.522334	135431	BX093982
HSI020D05	TFAP2A	Transcription factor AP-2 alpha (activating enhancer binding protein 2 alpha)	Hs.519880	136207	BX097101
HSI020D06	PEMT	Phosphatidylethanolamine N-methyltransferase	Hs.287717	136643	BX097964
HSI020D07	IGKC	Immunoglobulin kappa variable 1-5	Hs.449621	134292	BX094002
HSI020D08	BMS1L	BMS1-like, ribosome assembly protein (yeast)	Hs.10848	135838	BX098085
HSI020D09	SNX13	Sorting nexin 13	Hs.487648	135910	BX094051
HSI020D10	IFITM2	Interferon induced transmembrane protein 2 (1-8D)	Hs.174195	133174	BX098117
HSI020D11	STX11	Syntaxin 11	Hs.118958	136223	BX099000
HSI020D12	GIPC1	GIPC PDZ domain containing family, member 1	Hs.6454	135843	BX097007
HSI020E01	PAM	Peptidylglycine alpha-amidating monooxygenase	Hs.369430	136657	BX092970
HSI020E02	FLJ20152	Hypothetical protein FLJ20152	Hs.481704	135078	BX097075
HSI020E03	PPFIA1	Protein tyrosine phosphatase, receptor type, f polypeptide (PTPRF), interacting protein (liprin), alpha 1	Hs.530749	138153	BX093006
HSI020E04	CNOT2	CCR4-NOT transcription complex, subunit 2	Hs.133350	1668484	BX106681
HSI020E05	ADORA3	Adenosine A3 receptor	Hs.281342	137746	BX093971
HSI020E06	CDYL	Chromodomain protein, Y-like	Hs.269092	137825	BX094040
HSI020E07	TMED7	Transmembrane emp24 protein transport domain containing 7	Hs.508765	138141	BX094957
HSI020E08	CSF3R	Colony stimulating factor 3 receptor (granulocyte)	Hs.524517	134369	BX104916
HSI020E09	USP15	Ubiquitin specific peptidase 15	Hs.434951	136304	BX105021
HSI020E10	BHLHB3	Basic helix-loop-helix domain containing, class B, 3	Hs.177841	137785	BX100861
HSI020E11	ZA20D2	Zinc finger, A20 domain containing 2	Hs.406096	137405	BX104930
HSI020E12	GULP1	GULP, engulfment adaptor PTB domain containing 1	Hs.470887	137861	BX100904
HSI020F01	EST	Transcribed locus	Hs.86538	1652139	AI023995
HSI020F02	LAMA3	Laminin, alpha 3	Hs.436367	138209	BX101940
HSI020F03	C9orf72	Chromosome 9 open reading frame 72	Hs.493639	135498	BX107169
HSI020F04	CKAP2	Cytoskeleton associated protein 2	Hs.444028	135943	BX112690
HSI020F05	DUS3L	Dihydrouridine synthase 3-like (S. cerevisiae)	Hs.284297	133663	BX112639
HSI020F06	NCKAP1	NCK-associated protein 1	Hs.516633	135176	BX112791
HSI020F07	RAB40C	RAB40C, member RAS oncogene family	Hs.459630	136303	BX112916
HSI020F08	FBXO11	F-box protein 11	Hs.555987	134008	BX092401
HSI020F09	GCLM	Glutamate-cysteine ligase, modifier subunit	Hs.315562	135931	BX113876
HSI020F10	STIM2	Stromal interaction molecule 2	Hs.135763	133964	BX092522
HSI020F11	DLL4	Delta-like 4 (Drosophila)	Hs.511076	135185	BX114546
HSI020F12	TTC19	Tetratricopeptide repeat domain 19	Hs.462316	136366	BX114627
HSI020G01	PDCD10	Programmed cell death 10	Hs.478150	137836	BX108896
HSI020G02	ANXA9	Annexin A9	Hs.430324	137481	BX108978
HSI020G03	LOC387755	LOC387755 hypothetical protein	Hs.374080	1649080	BX105707
HSI020G04	WDR32	WD repeat domain 32	Hs.522130	1649529	BX090912
HSI020G05	CTBS	Chitobiase, di-N-acetyl-	Hs.558316	138294	BX109756
HSI020G06	RFXAP	Regulatory factor X-associated protein	Hs.24422	135542	BX113684
HSI020G07	FUSIP1	FUS interacting protein (serine/arginine-rich) 1	Hs.3530	135214	CR739591
HSI020G08	DALRD3	DALR anticodon binding domain containing 3	Hs.280978	134428	BX116502
HSI020G09	HIST1H2BK	Histone 1, H2bk	Hs.437275	135987	BX090468
HSI020G10	SCOTIN	Scotin	Hs.414579	134592	R27813
HSI020G11	EXOSC2	Exosome component 2	Hs.211973	135203	BX090819
HSI020G12	UFM1	Ubiquitin-fold modifier 1	Hs.524969	133732	BX116871
HSI020H01	PLCB1	Phospholipase C, beta 1 (phosphoinositide-specific)	Hs.431173	136838	CR748383
HSI020H02	C6orf61	Chromosome 6 open reading frame 61	Hs.279008	135999	BX091539
HSI020H03	CAPN6	Calpain 6	Hs.496593	134589	BX117833
HSI020H04	UBTF	Upstream binding transcription factor, RNA polymerase I	Hs.89781	136795	BX091747
HSI020H05	PKIB	Protein kinase (cAMP-dependent, catalytic) inhibitor beta	Hs.486354	134059	BX091692
HSI020H06	ZNF131	Zinc finger protein 131 (clone pHZ-10)	Hs.559433	136363	BX092340
HSI020H07	RPLP1	Ribosomal protein, large, P1	Hs.356502	135576	BX090422
HSI020H08	SMS	Spermine synthase	Hs.288487	135100	BX090524
HSI020H09	RDH14	Retinol dehydrogenase 14 (all-trans and 9-cis)	Hs.288880	137904	BX116594
HSI020H10	SEPTIN7	Septin 7	Hs.191346	136766	BX090653
HSI020H11	SFRS4	Splicing factor, arginine/serine-rich 4	Hs.469970	135606	BX090765
HSI020H12	OSBPL10	Oxysterol binding protein-like 10	Hs.150122	135608	BX091280
HSI021A01	DPP4	Dipeptidyl-peptidase 4 (CD26, adenosine deaminase complexing protein 2)	Hs.368912	1678533	AI080271
HSI021A02	EST	Transcribed locus	Hs.143610	1680453	BX106372
HSI021A03	EST	Transcribed locus	Hs.536174	138278	BX117780
HSI021A04	MYLK	Myosin, light polypeptide kinase	Hs.477375	138283	BX118740
HSI021A05	MRPS6	Mitochondrial ribosomal protein S6	Hs.302742	137538	BX118830
HSI021A06	SEC13L1	SEC13-like 1 (S. cerevisiae)	Hs.166924	1688026	BX103884
HSI021A07	COL22A1	Collagen, type XXII, alpha 1	Hs.117169	1691575	BX104734
HSI021A08	HGS	Hepatocyte growth factor-regulated tyrosine kinase substrate	Hs.514590	136021	BX099499
HSI021A09	MPP5	Membrane protein, palmitoylated 5 (MAGUK p55 subfamily member 5)	Hs.509699	135670	BX099753
HSI021A10	EST	Transcribed locus	Hs.568854	134479	BX100446
HSI021A11	EST	Transcribed locus	Hs.135562	1682797	BX089226
HSI021A12	KIAA1571	KIAA1571 protein	Hs.110489	138337	BX094177
HSI021B01	RSBN1	Round spermatid basic protein 1	Hs.486285	137620	BX098483
HSI021B02	EST	Transcribed locus	Hs.436136	1677727	BX101444
HSI021B03	PGF	Placental growth factor, vascular endothelial growth factor-related protein	Hs.252820	136045	BX099537
HSI021B04	GSTM3	Glutathione S-transferase M3 (brain)	Hs.2006	137940	BX095360
HSI021B05	FZD6	Frizzled homolog 6 (Drosophila)	Hs.292464	137125	BX109942
HSI021B06	PTPRG	Protein tyrosine phosphatase, receptor type, G	Hs.146050	137531	BX095466
HSI021B07	TTLL5	Tubulin tyrosine ligase-like family, member 5	Hs.200747	136026	BX099711
HSI021B08	PDK4	Pyruvate dehydrogenase kinase, isozyme 4	Hs.8364	138352	BX095607
HSI021B09	TRIM24	Tripartite motif-containing 24	Hs.490287	137535	BX096277
HSI021B10	OSGEPL1	O-sialoglycoprotein endopeptidase-like 1	Hs.60772	136775	BX100499
HSI021B11	C1orf123	Chromosome 1 open reading frame 123	Hs.525391	134213	BX106827
HSI021B12	HOXB5	Homeobox B5	Hs.149548	135050	BX106448
HSI021C01	FLJ37266	Hypothetical protein LOC283225	Hs.503453	1678541	CR740375
HSI021C02	ALPK2	Alpha-kinase 2	Hs.567656	134520	CR743265
HSI021C03	TXNDC	Thioredoxin domain containing	Hs.125221	136093	BX107832
HSI021C04	LGALS13	Lectin, galactoside-binding, soluble, 13 (galectin 13)	Hs.23671	135639	BX107774
HSI021C05	CCL28	Chemokine (C-C motif) ligand 28	Hs.334633	136919	BX108072
HSI021C06	STS	Steroid sulfatase (microsomal), arylsulfatase C, isozyme S	Hs.522578	134158	BX119415
HSI021C07	DDHD1	DDHD domain containing 1	Hs.513260	138049	BX102328
HSI021C08	TTYH3	Tweety homolog 3 (Drosophila)	Hs.440899	135657	BX106669
HSI021C09	SLC16A5	Solute carrier family 16 (monocarboxylic acid transporters), member 5	Hs.369554	138051	BX102459
HSI021C10	STX16	Syntaxin 16	Hs.307913	137982	BX102625
HSI021C11	PCNP	PEST-containing nuclear protein	Hs.275865	138374	BX104140
HSI021C12	CAMTA1	Calmodulin binding transcription activator 1	Hs.397705	137150	CR740156
HSI021D01	FAM13C1	Family with sequence similarity 13, member C1	Hs.499705	138444	BX104237
HSI021D02	LRP8	Low density lipoprotein receptor-related protein 8, apolipoprotein e receptor	Hs.280387	137995	BX103904
HSI021D03	CDS1	CDP-diacylglycerol synthase (phosphatidate cytidylyltransferase) 1	Hs.444924	133825	BX114169
HSI021D04	MLLT4	Myeloid/lymphoid or mixed-lineage leukemia (trithorax homolog, Drosophila); translocated to, 4	Hs.487188	136104	CR748758
HSI021D05	ZNF512	Zinc finger protein 512	Hs.529178	135560	BX110523
HSI021D06	MBD1	Methyl-CpG binding domain protein 1	Hs.405610	134257	BX114301
HSI021D07	OLR1	Oxidised low density lipoprotein (lectin-like) receptor 1	Hs.412484	135699	BX114403
HSI021D08	IFNGR1	Interferon gamma receptor 1	Hs.520414	136478	BX114443
HSI021D09	SLC35F5	Solute carrier family 35, member F5	Hs.292509	135687	BX115328
HSI021D10	ZFR	Zinc finger RNA binding protein	Hs.435231	136552	BX115375
HSI021D11	SFRS5	Splicing factor, arginine/serine-rich 5	Hs.166975	133843	BX112282
HSI021D12	RPS7	Ribosomal protein S7	Hs.534346	136938	BX116351
HSI021E01	KIAA0101	KIAA0101	Hs.81892	136876	BX094416
HSI021E02	ANXA4	Annexin A4	Hs.422986	138751	BX110594
HSI021E03	C1GALT1	Core 1 synthase, glycoprotein-N-acetylgalactosamine 3-beta-galactosyltransferase, 1	Hs.239666	138419	BX111399
HSI021E04	TMEM107	Transmembrane protein 107	Hs.513933	136856	BX115291
HSI021E05	RAD51AP1	RAD51 associated protein 1	Hs.504550	135746	BX115402
HSI021E06	C22orf5	Chromosome 22 open reading frame 5	Hs.182626	138041	BX111582
HSI021E07	TCF21	Transcription factor 21	Hs.78061	138045	BX112351
HSI021E08	EST	Transcribed locus	Hs.562713	1690766	BX101136
HSI021E09	AMMECR1	Alport syndrome, mental retardation, midface hypoplasia and elliptocytosis chromosomal region, gene 1	Hs.211021	138430	BX112410
HSI021E10	LOC124491	LOC124491	Hs.487510	135197	BX091900
HSI021E11	LOC401131	SH3-domain GRB2-like 3	Hs.458285	134816	BX091984
HSI021E12	FLJ21657	Hypothetical protein FLJ21657	Hs.558531	136528	BX092858
HSI021F01	S100P	S100 calcium binding protein P	Hs.2962	135221	BX092848
HSI021F02	EML2	Echinoderm microtubule associated protein like 2	Hs.24178	134523	BX092868
HSI021F03	OGDH	Oxoglutarate (alpha-ketoglutarate) dehydrogenase (lipoamide)	Hs.488181	135213	BX089330
HSI021F04	SLC1A3	Solute carrier family 1 (glial high affinity glutamate transporter), member 3	Hs.481918	136088	BX093926
HSI021F05	HPGD	Hydroxyprostaglandin dehydrogenase 15-(NAD)	Hs.77348	136154	BX091884
HSI021F06	TncRNA	Trophoblast-derived noncoding RNA	Hs.433995	138073	BX118286
HSI021F07	FLJ20035	Hypothetical protein FLJ20035	Hs.481141	138081	BX119303
HSI021F08	ACVR2B	Activin A receptor, type IIB	Hs.517775	136908	BX103402
HSI021F09	CASC4	Cancer susceptibility candidate 4	Hs.512867	138805	BX089235
HSI021F10	C1orf103	Chromosome 1 open reading frame 103	Hs.25245	137655	BX089321
HSI021F11	PLA2G5	Phospholipase A2, group V	Hs.319438	135692	BX093951
HSI021F12	EST	Transcribed locus	Hs.134192	1677257	BX090163
HSI021G01	EST	Transcribed locus	Hs.590719	138121	CR736419
HSI021G02	PSCD3	Pleckstrin homology, Sec7 and coiled-coil domains 3	Hs.487479	136972	BX097043
HSI021G03	RRAGC	Ras-related GTP binding C	Hs.532461	138897	BX093972
HSI021G04	C1orf48	Chromosome 1 open reading frame 48	Hs.497692	137370	BX097965
HSI021G05	NYD-SP21	MS4A13 protein	Hs.28514	139313	BX097102
HSI021G06	ASAM	Adipocyte-specific adhesion molecule	Hs.504187	139689	BX090712
HSI021G07	P2RY14	Purinergic receptor P2Y, G-protein coupled, 14	Hs.2465	136983	BX098156
[truncated: 15,557 more rows]
